# Supplementary material for: Use of Angiotensin System Inhibitors Is Associated with Immune Activation and Longer Survival in Nonmetastatic Pancreatic Ductal Adenocarcinoma
Source: Oxford University Press journal article supplement (doi:10.1158/1078-0432.ccr-17-0256), 2017-06-09
Supplement: 10780432ccr170256-sup-178162_3_unknown_upload_4060979_1qh81h.xlsx [file 10780432ccr170256-sup-178162_3_unknown_upload_4060979_1qh81h.xlsx]

## Sheet: Supplementary Table 1
Supplementary Table 1: Patient characteristics, unadjusted univariate model and adjusted analysis with multivariate model of overall survival in patients unresected due to metastatic tumor
Patient characteristics						unadjusted univariate model				adjusted analysis with multivariate model
Metastatic		no ASI	ASI	Total	p- value	n	Median Survival (months)	95% CI	p value	HR	95% CI	p value
Age	y	64.8 ± 12.2	70.6 ± 9.4	310	<0.001	310	HR 1.029	1.018 - 1.040	<0.001	1.024	1.012 - 1.036	<0.001
Site	Non-head	127 (73 %)	79 (58 %)	206 (66 %)	0.006	174	5.35524	4.2 - 6.5	0.218	0.767	0.605 - 0.972	0.028
	Head	47 (27 %)	57 (42 %)	104 (34 %)		136	6.14374	4.5 - 7.8
Chemo	-	55 (27 %)	37 (36 %)	92 (30 %)	0.106	92	2.33265	1.7 - 3	<0.001	0.244	0.184 - 0.325	<0.001
	+	151 (73 %)	67 (64 %)	218 (70 %)		218	8.37782	7.2 - 9.6
HTN	-	125 (61 %)	4 (4 %)	129 (42 %)	<0.001	129	6.50513	5 - 8	0.845	0.941	0.701 - 1.262	0.684
	+	81 (39 %)	100 (96 %)	181 (58 %)		181	5.0924	4 - 6.2
ASI	-					206	6.34086	5.2 - 7.5	0.561	0.944	0.705 - 1.263	0.697
	+					104	4.36961	3.3 - 5.5

## Sheet: Supplementary Table 2
Supplementary Table 2: Patient characteristics (left), unadjusted univariate model (middle) and adjusted analysis with multivariate model (right) of overall survival (months) in patients unresected due to locally advanced diesease
Patient characteristics						unadjusted univariate model				adjusted analysis with multivariate model
LA/Borderline Unresected		no ASI	ASI	Total	p- value	n	Median Survival (months)	95% CI	p value	HR	95% CI	p value
Age	y	65.5 ± 11.9	69.0 ± 11.8	185	0.066	185	HR 1.020	1.007 - 1.034	0.004	1.016	1.001 - 1.032	0.04
Size	cm	4.0 ± 1.4	3.6 ± 1.3	181	0.101	180	HR 1.075	0.959 - 1.205	0.216	1.014	0.9 - 1.143	0.818
Site	Non-head	41 (34 %)	22 (35 %)	63 (34 %)	0.858	63	8.8	6.8 - 10.7	0.182	0.771	0.533 - 1.116	0.168
	Head	81 (66 %)	41 (65 %)	122 (66 %)		122	10.1	8.4 - 11.8
RT	-	58 (48 %)	38 (60 %)	96 (52 %)	0.099	96	6.9	5.9 - 7.8	<0.001	0.455	0.327 - 0.632	<0.001
	+	64 (52 %)	25 (40 %)	89 (48 %)		89	12.6	10.1 - 15.1
Chemo	-	32 (26 %)	17 (27 %)	49 (26 %)	0.912	49	5	3.8 - 6.3	<0.001	0.338	0.231 - 0.493	<0.001
	+	90 (74 %)	46 (73 %)	136 (74 %)		136	11.9	10.4 - 13.5
HTN	-	67 (55 %)	2 (3 %)	69 (37 %)	<0.001	69	9.5	8.2 - 10.8	0.533	0.945	0.654 - 1.366	0.764
	+	55 (45 %)	61 (97 %)	116 (63 %)		116	10.1	8 - 12.2
ASI	-					122	9.3	8.4 - 10.1	0.091	0.572	0.386 - 0.847	0.005
	+					63	11.4	8.2 - 14.6

## Sheet: Supplementary Table 3
Supplementary Table 3: Unadjusted Univariate Analysis of Resected Patients with Hypertension, Stratified by ASI and Chemotherapy
Supplementary Table 3A: Case processing summary of patients with hypertension and resected primray tumor
RESECTEDHTN	Total N	N of Events	Censored
			N	Percent
ASI+, Chemo+	39	27	12	0.308
ASI+, Chemo-	22	12	10	0.455
ASI-, Chemo+	18	15	3	0.167
ASI-, Chemo-	9	8	1	0.111
Overall	88	62	26	0.295
Supplementary Table 3B: Means and medians for overall survival of patients with hypertension and resected primary tumor
RESECTEDHTN	Median
	Estimate	Std. Error	95% CI
			Lower Bound	Upper Bound
ASI+, Chemo+	28.7	9.83	9.433	47.967
ASI+, Chemo-	39.2	22.686	0	83.664
ASI-, Chemo+	12.3	4.861	2.772	21.828
ASI-, Chemo-	9.3	2.087	5.209	13.391
Overall	20.3	6.387	7.781	32.819
Supplementary Table 3C: Pairwise comparison of overall survival in patients with hypertension and resected primary tumor
	RESECTEDHTN	ASI+, Chemo+		ASI+, Chemo-		ASI-, Chemo+		ASI-, Chemo-
		Chi-Square	Sig.	Chi-Square	Sig.	Chi-Square	Sig.	Chi-Square	Sig.
Log Rank (Mantel-Cox)	ASI+, Chemo+			0.372	0.542	3.898	0.048	7.923	0.005
	ASI+, Chemo-	0.372	0.542			3.382	0.066	6.606	0.01
	ASI-, Chemo+	3.898	0.048	3.382	0.066			1.799	0.18
	ASI-, Chemo-	7.923	0.005	6.606	0.01	1.799	0.18

## Sheet: Supplementary Table 4
Supplementary Table 4: Propensity score analysis
A: Propensity score adjusted result in Cox model
	Factor	Haz. Ratio	Std. Err.	z	p value	[95% Conf. Interval]
Metastatic	ASI	1.04723	0.155219	0.31	0.756	0.783 - 1.4
LA	ASI	0.664421	0.137867	-1.97	0.049	0.442 - 0.998
Resected	ASI	0.559626	0.109551	-2.97	0.003	0.381 - 0.821
B: Survival treatment-effects estimation
Estimator: inverse-probability weights
		Coef.	Robust Std. Err.	z	P>|z|	[95% Conf. Interval]
Metastatic	ATE	-1.61702	0.924095	-1.75	0.08	-3.43 - 0.19
	POmean	8.64124	0.683572	12.64	0	7.3 - 9.98
Locally Advanced	ATE	8.4956	2.81043	3.02	0.003	2.99 - 14
	POmean	10.1083	0.875012	11.55	0	8.39 - 11.82
Resected	ATE	13.9312	6.98054	2	0.046	0.25 - 27.61
	POmean	21.675	2.91781	7.43	0	15.96 - 27.39
ATE: average treatment effects

## Sheet: Supplementary Table 5
Supplementary Table 5: Competing risk analysis in resected patients
Competing-risks regression	events	SHR	Robust Std. Err.	z	p value	[95% Conf. Interval]
Liver mets	n=85	0.729022	0.161725	-1.42	0.154	0.472 - 1.126
lung mets	n=60	1.04102	0.268576	0.16	0.876	0.628 - 1.726
ascites peritonium	n=30	0.715866	0.268205	-0.89	0.372	0.343 - 1.492
local	n=32	0.755772	0.274475	-0.77	0.441	0.371 - 1.54
unspecific	n=39	1.11457	0.356403	0.34	0.734	0.596 - 2.086

## Sheet: Supplementary Table 6
Supplementary Table 6: Adjusted multivariate model analysis of time to recurrence in the liver, lung, and local recurrence, in patients with resected disease.
		Time to recurrene in the liver				Time to recurrene in the lung				Time to local recurrene
		HR	95% CI	p value		HR	95% CI	p value		HR	95% CI	p value
Age	inc 1y	0.978	0.956 - 1	0.052		1.019	0.991 - 1.048	0.185		0.986	0.954 - 1.02	0.42
Size	inc 1cm	1.07	0.901 - 1.271	0.438		1.255	1.098 - 1.435	0.001		1.101	0.904 - 1.343	0.339
BMI	inc 1 unit	0.934	0.888 - 0.984	0.01		0.987	0.933 - 1.043	0.636		0.978	0.915 - 1.046	0.514
Site	Non-head	0.591	0.345 - 1.013	0.056		0.987	0.483 - 2.017	0.971		1.422	0.58 - 3.486	0.442
	Head
Margin	-	0.741	0.382 - 1.435	0.374		0.629	0.29 - 1.366	0.242		2.836	1.338 - 6.012	0.007
	+
LNR	0	1.434	1.018 - 2.022	0.039		1.843	1.241 - 2.737	0.002		1.264	0.785 - 2.036	0.335
	<= 0.2
	>0.2
Grade	1 & 2	1.716	1.083 - 2.717	0.021		1.621	0.955 - 2.752	0.074		1.427	0.731 - 2.787	0.297
	3 & 4
LVI	-	1.64	0.947 - 2.841	0.077		0.78	0.427 - 1.422	0.417		0.797	0.382 - 1.663	0.545
	+
PNI	-	1.092	0.485 - 2.458	0.832		2.803	0.842 - 9.326	0.093		3.515	0.964 - 12.823	0.057
	+
Naj Tx	-	1.041	0.577 - 1.876	0.895		1.235	0.616 - 2.475	0.552		0.916	0.383 - 2.193	0.844
	+
Adj RT	-	0.63	0.362 - 1.096	0.102		1.221	0.668 - 2.232	0.516		1.474	0.669 - 3.247	0.336
	+
Adj Chemo	-	1.081	0.549 - 2.129	0.822		1.664	0.62 - 4.469	0.312		0.502	0.2 - 1.26	0.142
	+
HTN	-	2.629	1.433 - 4.824	0.002		0.917	0.423 - 1.988	0.826		0.889	0.343 - 2.306	0.809
	+
ASI	-	0.447	0.256 - 0.781	0.005		0.818	0.389 - 1.719	0.596		0.554	0.206 - 1.492	0.242
	+
