# Supplementary material for: Use of Angiotensin System Inhibitors Is Associated with Immune Activation and Longer Survival in Nonmetastatic Pancreatic Ductal Adenocarcinoma
Source: Oxford University Press journal article supplement (doi:10.1158/1078-0432.ccr-17-0256), 2017-06-09
Supplement: 10780432ccr170256-sup-178162_3_unknown_upload_4060980_jqh8jj.xlsx [file 10780432ccr170256-sup-178162_3_unknown_upload_4060980_jqh8jj.xlsx]

## Sheet: Sheet1
Supplementary table 7: Genes differentially expressed in ACEi alone treated group compared to control group
Gene Name	Locus	Control (FPKM)	ACEI treated (FPKM)	Fold Change	p-value	q-value	significant
AMY2A	chr1:104159998-104168400	0.640358	150.478	7.87645	5e-05	0.00931692	yes
SYCN	chr19:39693561-39694906	9.00957	1754	7.60498	0.0006	0.0487732	yes
PI16	chr6:36916038-36932613	0.398697	68.2491	7.41937	5e-05	0.00931692	yes
ARC	chr8:143692409-143695833	0.945669	146.073	7.27114	5e-05	0.00931692	yes
PLA2G1B	chr12:120759913-120765592	11.3264	1424.27	6.97439	0.00045	0.0403733	yes
SCARA5	chr8:27727398-27850369	0.533093	59.6607	6.80625	5e-05	0.00931692	yes
HBA1	chr16:226678-227520	1.16269	119.944	6.68875	0.00015	0.0197478	yes
PLIN1	chr15:90207599-90222648	0.5867	50.8644	6.43789	5e-05	0.00931692	yes
HBA2	chr16:222845-223709	3.88921	335.805	6.432	5e-05	0.00931692	yes
CELA2B	chr1:15802595-15817895	2.44888	206.544	6.39819	5e-05	0.00931692	yes
FABP4	chr8:82390731-82395473	2.21114	151.273	6.09621	5e-05	0.00931692	yes
CADM3	chr1:159141376-159172932	0.309424	18.6379	5.91251	5e-05	0.00931692	yes
NOS2	chr17:26083791-26127555	0.369648	18.76	5.66536	5e-05	0.00931692	yes
PNLIPRP1	chr10:118350489-118368686	2.33953	101.805	5.44345	5e-05	0.00931692	yes
CNTFR	chr9:34551429-34590138	0.109867	4.47286	5.34737	0.0003	0.0315965	yes
WISP2	chr20:43343884-43356452	1.63974	64.7276	5.30284	5e-05	0.00931692	yes
ADAMTS16	chr5:5140442-5320412	0.587498	19.0905	5.02213	5e-05	0.00931692	yes
OSR1	chr2:19551245-19558372	2.33289	69.5573	4.89801	0.0001	0.0145928	yes
KLK1	chr19:51322403-51327043	6.70407	177.384	4.72569	5e-05	0.00931692	yes
PENK	chr8:57353512-57359282	0.842219	19.4978	4.53297	0.00055	0.0459421	yes
PDIA2	chr16:333117-337209	2.68123	52.0923	4.2801	5e-05	0.00931692	yes
SUCNR1	chr3:151591430-151599876	0.679062	12.7326	4.22884	0.0001	0.0145928	yes
EBF2	chr8:25701572-25902392	0.40757	7.47692	4.19732	5e-05	0.00931692	yes
SOX17	chr8:55370494-55373456	1.35856	23.0362	4.08374	5e-05	0.00931692	yes
MT1A	chr16:56672577-56673999	5.40314	89.7129	4.05345	5e-05	0.00931692	yes
NLRP2	chr19:55476651-55512510	0.805027	13.0063	4.01402	5e-05	0.00931692	yes
GPD1	chr12:50497800-50505095	2.26293	34.0024	3.90937	5e-05	0.00931692	yes
CIDEC	chr3:9908393-9921938	3.82942	55.4787	3.85674	5e-05	0.00931692	yes
NGF	chr1:115828536-115880857	1.00828	13.1892	3.70939	0.00025	0.028037	yes
DGAT2	chr11:75479777-75512579	3.49679	44.0292	3.65436	0.00055	0.0459421	yes
LIPE	chr19:42905665-42931578	1.24231	15.4933	3.64055	5e-05	0.00931692	yes
CHIT1	chr1:203185206-203198860	2.51722	30.9961	3.62218	5e-05	0.00931692	yes
FAM107A	chr3:58549844-58563491	1.40489	17.1327	3.60822	0.0001	0.0145928	yes
LILRB5	chr19:54754269-54761167	1.22918	14.4778	3.55807	5e-05	0.00931692	yes
DARC	chr1:159173802-159176290	5.28518	60.9935	3.52863	0.00035	0.034465	yes
FGF18	chr5:170846666-170884630	0.82951	9.44579	3.50934	5e-05	0.00931692	yes
SLCO1B3	chr12:20963637-21069658	0.854396	9.17836	3.42526	0.00025	0.028037	yes
TNFRSF8	chr1:12123433-12204264	0.388403	4.12485	3.40872	0.00025	0.028037	yes
TWIST2	chr2:239756672-239795893	1.67446	17.7523	3.40624	5e-05	0.00931692	yes
LRRN4CL	chr11:62453873-62457371	1.14065	12.0542	3.40161	5e-05	0.00931692	yes
CBLN4	chr20:54572495-54580012	0.336636	3.49748	3.37706	0.0003	0.0315965	yes
WT1	chr11:32409321-32457081	0.843684	8.69495	3.3654	5e-05	0.00931692	yes
FCN1	chr9:137801430-137809806	2.3538	24.2198	3.36312	5e-05	0.00931692	yes
C17orf58	chr17:65987216-65989765	4.22272	40.1012	3.2474	0.0004	0.0364271	yes
CILP	chr15:65488336-65503840	2.14459	19.9134	3.21497	0.0003	0.0315965	yes
BDKRB1	chr14:96722558-96731100	6.19796	55.7788	3.16985	0.0003	0.0315965	yes
SELE	chr1:169691780-169703220	1.10806	9.82227	3.14802	0.00055	0.0459421	yes
RSPO3	chr6:127440047-127518184	0.745567	6.40275	3.10228	0.00035	0.034465	yes
NRN1	chr6:5998232-6007633	1.26873	10.6874	3.07446	5e-05	0.00931692	yes
FNDC5	chr1:33327868-33338082	0.454715	3.82575	3.07271	0.00015	0.0197478	yes
HSPB7	chr1:16340522-16345285	1.87799	15.5733	3.05181	0.0003	0.0315965	yes
CCL21	chr9:34709001-34710147	5.14912	42.1259	3.03231	0.0001	0.0145928	yes
CD209	chr19:7804880-7812464	0.665627	5.40735	3.02214	0.0001	0.0145928	yes
PDGFRL	chr8:17433941-17500642	5.1778	41.76	3.01171	0.0005	0.0435683	yes
TMEM88	chr17:7758383-7759417	5.74519	44.6208	2.95729	0.0002	0.024224	yes
PLAC9	chr10:81892257-81904784	13.2991	99.8457	2.90837	0.00015	0.0197478	yes
ADAMTSL1	chr9:18474078-18910947	0.689448	5.14214	2.89886	0.0002	0.024224	yes
OSR2	chr8:99956630-99964326	2.96013	21.9315	2.88927	5e-05	0.00931692	yes
GLT25D2	chr1:183904965-184006863	0.996087	7.21721	2.8571	5e-05	0.00931692	yes
CCL4	chr17:34431219-34433014	4.95275	35.6711	2.84845	0.00025	0.028037	yes
PCOLCE2	chr3:142536701-142608045	2.53745	17.9607	2.82339	0.0001	0.0145928	yes
AQP7	chr9:33384947-33402517	1.61288	11.383	2.81917	0.0004	0.0364271	yes
WNT10B	chr12:49359122-49365641	0.895079	5.87842	2.71534	0.00035	0.034465	yes
WBSCR17	chr7:70597788-71178584	0.746246	4.8541	2.70148	0.00045	0.0403733	yes
MT1G	chr16:56700652-56701977	14.1369	87.7088	2.63326	0.0004	0.0364271	yes
KCNIP2	chr10:103585730-103603677	1.72348	9.82443	2.51105	0.0004	0.0364271	yes
GALNTL1	chr14:69726680-69821190	1.50334	8.55695	2.50892	0.0004	0.0364271	yes
NLRP3	chr1:247579457-247612406	0.882588	4.99654	2.50112	0.00035	0.034465	yes
NAPSB	chr19:50837056-50848005	3.44004	18.8693	2.45555	0.0004	0.0364271	yes
ITM2A	chrX:78615880-78623049	3.21349	16.8274	2.3886	0.0005	0.0435683	yes
SLC19A3	chr2:228549925-228582745	1.76217	9.1559	2.37735	0.00035	0.034465	yes
FOLR2	chr11:71927818-71932994	12.9252	65.0858	2.33216	0.0002	0.024224	yes
ALPL	chr1:21835857-21904905	1.83363	9.00956	2.29676	0.00055	0.0459421	yes
IRF8	chr16:85932773-85956211	5.99601	28.4231	2.24499	5e-05	0.00931692	yes
DPP4	chr2:162848754-162931052	2.00428	8.36346	2.06101	0.0002	0.024224	yes
CMBL	chr5:10277706-10308168	3.6856	13.7323	1.89761	0.0001	0.0145928	yes
SLC6A20	chr3:45796940-45838035	3.82026	13.636	1.83568	0.0004	0.0364271	yes
SELPLG	chr12:109015679-109027670	11.5376	40.2985	1.80438	0.0001	0.0145928	yes
CSF3R	chr1:36931643-36948915	5.02053	15.6416	1.63948	0.00055	0.0459421	yes
ARHGAP4	chrX:153172829-153191714	13.3935	41.0104	1.61445	0.0004	0.0364271	yes
LEPREL1	chr3:189674516-189840226	29.4739	8.30273	-1.82778	0.0006	0.0487732	yes
FOXQ1	chr6:1312674-1314993	55.6457	15.0391	-1.88755	0.00015	0.0197478	yes
RIPK4	chr21:43159528-43187249	22.0194	5.8098	-1.92222	5e-05	0.00931692	yes
CADM4	chr19:44126521-44143991	13.5132	3.56383	-1.92286	0.0006	0.0487732	yes
CELSR2	chr1:109792640-109818378	5.48377	1.43839	-1.93071	0.00035	0.034465	yes
ABLIM2	chr4:7967036-8160559	11.4099	2.87254	-1.98988	0.00035	0.034465	yes
C7orf68	chr7:128095883-128098472	42.4871	10.0499	-2.07984	0.00055	0.0459421	yes
FAM176A	chr2:75719443-75796848	20.168	4.69446	-2.10304	0.0005	0.0435683	yes
AQP3	chr9:33441159-33447590	98.2046	21.5483	-2.18822	0.0003	0.0315965	yes
OSBP2	chr22:31090792-31303811	7.24749	1.55326	-2.22218	0.0002	0.024224	yes
VGF	chr7:100805789-100808852	13.8565	2.85121	-2.28091	0.00025	0.028037	yes
LYPD6B	chr2:149894980-150071772	20.6814	4.20176	-2.29927	0.0004	0.0364271	yes
COL4A5	chrX:107683153-107940775	8.35704	1.62171	-2.36547	5e-05	0.00931692	yes
TNC	chr9:117781853-117880536	21.5456	3.68222	-2.54874	5e-05	0.00931692	yes
CXCL6	chr4:74702272-74704477	18.2282	2.98145	-2.61209	0.00015	0.0197478	yes
CRLF1	chr19:18704034-18717660	9.4015	1.47278	-2.67435	0.0002	0.024224	yes
WNT10A	chr2:219745254-219758651	16.871	2.59242	-2.70218	0.00035	0.034465	yes
CPS1	chr2:211342405-211543831	3.67265	0.562825	-2.70606	0.00025	0.028037	yes
SMOC1	chr14:70346113-70499083	8.74236	1.32765	-2.71915	5e-05	0.00931692	yes
HIST2H2BE	chr1:149856009-149858232	43.4306	6.50003	-2.74019	0.00015	0.0197478	yes
CDKN2A	chr9:21967137-21994490	22.2292	3.26109	-2.76903	0.0004	0.0364271	yes
SPRR3	chr1:152974222-152976332	74.0201	10.3516	-2.83807	0.0001	0.0145928	yes
GJB5	chr1:35220720-35224112	23.0302	2.95307	-2.96324	0.0001	0.0145928	yes
UPK1B	chr3:118892424-118924000	38.4553	4.92355	-2.96541	0.0001	0.0145928	yes
SCEL	chr13:78109808-78219398	39.9106	4.86926	-3.035	0.0001	0.0145928	yes
TMPRSS13	chr11:117771355-117800168	5.91799	0.720624	-3.03779	0.0001	0.0145928	yes
PKP1	chr1:201252579-201302121	18.9007	2.29418	-3.04239	0.0002	0.024224	yes
DSG3	chr18:29027731-29058665	10.5096	1.24682	-3.07538	0.0005	0.0435683	yes
PPP2R2C	chr4:6322304-6565327	9.38735	1.10989	-3.0803	5e-05	0.00931692	yes
FGF19	chr11:69513005-69519106	25.7133	2.8822	-3.15727	5e-05	0.00931692	yes
SLC34A2	chr4:25657434-25680368	13.6262	1.49349	-3.18962	5e-05	0.00931692	yes
SYT12	chr11:66790189-66818334	11.7203	1.24258	-3.23759	5e-05	0.00931692	yes
KRT20	chr17:39032140-39041495	6.29492	0.66385	-3.24526	0.00025	0.028037	yes
UGT2B15,UGT2B17	chr4_ctg9_hap1:224703-248966	6.12874	0.62456	-3.29468	0.00015	0.0197478	yes
HP	chr16:72088507-72094955	15.7514	1.59349	-3.30522	0.0003	0.0315965	yes
KRT16	chr17:39766030-39769079	138.176	11.9325	-3.53355	5e-05	0.00931692	yes
TP63	chr3:189349215-189615068	5.38933	0.464065	-3.53771	5e-05	0.00931692	yes
LYPD3	chr19:43964945-43969831	54.4695	4.23166	-3.68615	5e-05	0.00931692	yes
ITIH2	chr10:7745235-7791483	8.7563	0.674861	-3.69766	5e-05	0.00931692	yes
GSDMC	chr8:130760441-130799134	5.78015	0.440493	-3.71391	0.00015	0.0197478	yes
MMP10	chr11:102641232-102651359	13.7236	1.01487	-3.75729	5e-05	0.00931692	yes
LTF	chr3:46477495-46506598	31.606	2.20422	-3.84186	5e-05	0.00931692	yes
EDN2	chr1:41944445-41950344	6.81885	0.473639	-3.84767	0.00015	0.0197478	yes
KRT6B	chr12:52840434-52845910	39.2909	2.39129	-4.03834	5e-05	0.00931692	yes
LYPD2	chr8:143831627-143833952	97.1072	5.48865	-4.14505	0.0006	0.0487732	yes
CLCA2	chr1:86889768-86922240	14.066	0.768297	-4.1944	0.0001	0.0145928	yes
FGFBP1	chr4:15937192-15939971	38.7037	2.0841	-4.21497	5e-05	0.00931692	yes
NXPH4	chr12:57610577-57620232	15.2801	0.770154	-4.31036	0.0001	0.0145928	yes
BNIPL	chr1:151009028-151020076	6.53966	0.328591	-4.31485	5e-05	0.00931692	yes
CPA4	chr7:129932973-129964020	5.54336	0.276482	-4.32551	5e-05	0.00931692	yes
LRAT	chr4:155665162-155674270	3.34504	0.16076	-4.37904	5e-05	0.00931692	yes
KRT81	chr12:52679696-52685299	6.8904	0.310561	-4.47164	0.0001	0.0145928	yes
MTRNR2L1	chr17:22022436-22023991	29.5137	1.21709	-4.59987	5e-05	0.00931692	yes
FAM84A	chr2:14772809-14780168	15.2109	0.618064	-4.62121	5e-05	0.00931692	yes
SPRR1B	chr1:153003678-153005376	243.847	9.48064	-4.68485	5e-05	0.00931692	yes
CTSL2	chr9:99791958-99801925	21.6752	0.832259	-4.70287	5e-05	0.00931692	yes
TNNT1	chr19:55644160-55660606	32.4742	1.22073	-4.73348	5e-05	0.00931692	yes
MMP13	chr11:102813720-102826463	11.08	0.391974	-4.82106	0.0001	0.0145928	yes
GJB6	chr13:20796100-20806534	22.8728	0.738887	-4.95214	5e-05	0.00931692	yes
SLAMF9	chr1:159921281-159924044	19.9382	0.632555	-4.9782	5e-05	0.00931692	yes
HAPLN1	chr5:82934016-83016896	9.55922	0.27039	-5.14378	5e-05	0.00931692	yes
FAT2	chr5:150883652-150948505	3.95202	0.110346	-5.16249	5e-05	0.00931692	yes
APCS	chr1:159557615-159558661	171.536	3.31453	-5.69356	5e-05	0.00931692	yes
SLITRK6	chr13:86366921-86373483	9.6354	0.145864	-6.04565	5e-05	0.00931692	yes
FGG	chr4:155525285-155533902	125.132	0.925436	-7.0791	5e-05	0.00931692	yes
CALB1	chr8:91070837-91095107	44.0833	0.286812	-7.26398	5e-05	0.00931692	yes
KRT5	chr12:52908358-52914243	289.844	0.882716	-8.35911	0.0001	0.0145928	yes
KRT14	chr17:39738530-39743147	111.009	0.221639	-8.96825	0.00025	0.028037	yes
