# Supplementary material for: Use of Angiotensin System Inhibitors Is Associated with Immune Activation and Longer Survival in Nonmetastatic Pancreatic Ductal Adenocarcinoma
Source: Oxford University Press journal article supplement (doi:10.1158/1078-0432.ccr-17-0256), 2017-06-09
Supplement: 10780432ccr170256-sup-178162_3_unknown_upload_4060981_lqh8lj.xlsx [file 10780432ccr170256-sup-178162_3_unknown_upload_4060981_lqh8lj.xlsx]

## Sheet: GO Biological processes up-reg
Supplementary Table 8: Complete results for GO analysis on differentially expressed genes comparing lisinopril vs. control PDAC tumors.
Analysis Type:	PANTHER Overrepresentation Test (release 20160715)
Annotation Version and Release Date:	GO Ontology database Released 2016-11-30
Analyzed List:	upload_1 (Homo sapiens)
Reference List:	Homo sapiens (all genes in database)
Bonferroni correction:	TRUE
Bonferroni count:	8330
GO biological process complete	Homo sapiens - REFLIST (20972)	upload_1 (80)	upload_1 (expected)	upload_1 (over/under)	upload_1 (fold Enrichment)	upload_1 (P-value)
defense response (GO:0006952)	1259	17	4.8	+	3.54	0.0374
cellular response to organic substance (GO:0071310)	1954	22	7.45	+	2.95	0.022
Unclassified (UNCLASSIFIED)	3900	5	14.88	-	0.34	0

## Sheet: GO Molecular function up-reg
Analysis Type:	PANTHER Overrepresentation Test (release 20160715)
Annotation Version and Release Date:	GO Ontology database Released 2016-11-30
Analyzed List:	upload_1 (Homo sapiens)
Reference List:	Homo sapiens (all genes in database)
Bonferroni correction:	TRUE
Bonferroni count:	2777
GO molecular function complete	Homo sapiens - REFLIST (20972)	upload_1 (80)	upload_1 (expected)	upload_1 (over/under)	upload_1 (fold Enrichment)	upload_1 (P-value)
Unclassified (UNCLASSIFIED)	3770	6	14.38	-	0.42	0

## Sheet: GO cellular component up-reg
Analysis Type:	PANTHER Overrepresentation Test (release 20160715)
Annotation Version and Release Date:	GO Ontology database Released 2016-11-30
Analyzed List:	upload_1 (Homo sapiens)
Reference List:	Homo sapiens (all genes in database)
Bonferroni correction:	TRUE
Bonferroni count:	1304
GO cellular component complete	Homo sapiens - REFLIST (20972)	upload_1 (80)	upload_1 (expected)	upload_1 (over/under)	upload_1 (fold Enrichment)	upload_1 (P-value)
lipid particle (GO:0005811)	67	5	0.26	+	19.56	0.00855
extracellular space (GO:0005615)	1436	18	5.48	+	3.29	0.00816
extracellular region (GO:0005576)	4564	42	17.41	+	2.41	2.28e-06
extracellular region part (GO:0044421)	3841	32	14.65	+	2.18	0.00654
Unclassified (UNCLASSIFIED)	2678	2	10.22	-	< 0.2	0

## Sheet: GO Biological proccesses down
Analysis Type:	PANTHER Overrepresentation Test (release 20160715)
Annotation Version and Release Date:	GO Ontology database Released 2016-11-30
Analyzed List:	upload_1 (Homo sapiens)
Reference List:	Homo sapiens (all genes in database)
Bonferroni correction:	TRUE
Bonferroni count:	8330
GO biological process complete	Homo sapiens - REFLIST (20972)	upload_1 (68)	upload_1 (expected)	upload_1 (over/under)	upload_1 (fold Enrichment)	upload_1 (P-value)
hair follicle morphogenesis (GO:0031069)	27	4	0.09	+	45.69	0.0174
epidermis morphogenesis (GO:0048730)	30	4	0.1	+	41.12	0.0264
hair cycle (GO:0042633)	85	6	0.28	+	21.77	0.00326
molting cycle (GO:0042303)	85	6	0.28	+	21.77	0.00326
epidermis development (GO:0008544)	259	12	0.84	+	14.29	4.02e-07
skin development (GO:0043588)	214	8	0.69	+	11.53	0.0042
epithelial cell differentiation (GO:0030855)	503	10	1.63	+	6.13	0.0428
epithelium development (GO:0060429)	924	16	3	+	5.34	0.000275
tissue development (GO:0009888)	1541	21	5	+	4.2	8.04e-05
Unclassified (UNCLASSIFIED)	3900	5	12.65	-	0.4	0

## Sheet: GO Molecular function down
Analysis Type:	PANTHER Overrepresentation Test (release 20160715)
Annotation Version and Release Date:	GO Ontology database Released 2016-11-30
Analyzed List:	upload_1 (Homo sapiens)
Reference List:	Homo sapiens (all genes in database)
Bonferroni correction:	TRUE
Bonferroni count:	2777
GO molecular function complete	Homo sapiens - REFLIST (20972)	upload_1 (68)	upload_1 (expected)	upload_1 (over/under)	upload_1 (fold Enrichment)	upload_1 (P-value)
structural molecule activity (GO:0005198)	790	13	2.56	+	5.08	0.00382
Unclassified (UNCLASSIFIED)	3770	9	12.22	-	0.74	0

## Sheet: GO cellular component down
Analysis Type:	PANTHER Overrepresentation Test (release 20160715)
Annotation Version and Release Date:	GO Ontology database Released 2016-11-30
Analyzed List:	upload_1 (Homo sapiens)
Reference List:	Homo sapiens (all genes in database)
Bonferroni correction:	TRUE
Bonferroni count:	1304
GO cellular component complete	Homo sapiens - REFLIST (20972)	upload_1 (68)	upload_1 (expected)	upload_1 (over/under)	upload_1 (fold Enrichment)	upload_1 (P-value)
intermediate filament (GO:0005882)	207	7	0.67	+	10.43	0.00681
intermediate filament cytoskeleton (GO:0045111)	250	7	0.81	+	8.64	0.0229
proteinaceous extracellular matrix (GO:0005578)	365	8	1.18	+	6.76	0.032
extracellular space (GO:0005615)	1436	21	4.66	+	4.51	3.63e-06
extracellular region part (GO:0044421)	3841	39	12.45	+	3.13	1.07e-09
extracellular region (GO:0005576)	4564	43	14.8	+	2.91	2.94e-10
Unclassified (UNCLASSIFIED)	2678	1	8.68	-	< 0.2	0

## Sheet: REACTOME_up
Supplementary Table 9: Complete results for REACTOME analysis on differentially expressed genes comparing lisinopril vs. control PDAC tumors.
Pathway identifier	Pathway name	#Entities found	#Entities total	Entities ratio	Entities pValue	Entities FDR	#Reactions found	#Reactions total	Reactions ratio	Species identifier	Species name	Submitted entities found	Mapped entities	Found reaction identifiers
R-HSA-73923	Lipid digestion, mobilization, and transport	8	151	0.0118636	1.76481e-05	0.00663567	15	111	0.0111056	9606	Homo sapiens	PNLIPRP1;LIPE;FABP4;PLIN1;CIDEC		R-HSA-163554;R-HSA-163489;R-HSA-163402;R-HSA-6784622;R-HSA-163432;R-HSA-163602;R-HSA-163539;R-HSA-8856630;R-HSA-163568;R-HSA-163418;R-HSA-192475;R-HSA-163416;R-HSA-5334794;R-HSA-163551;R-HSA-163549
R-HSA-163560	Hormone-sensitive lipase (HSL)-mediated triacylglycerol hydrolysis	4	31	0.00243558	9.00911e-05	0.0169371	12	13	0.00130065	9606	Homo sapiens	LIPE;FABP4;PLIN1		R-HSA-163554;R-HSA-163602;R-HSA-163539;R-HSA-163568;R-HSA-163489;R-HSA-163418;R-HSA-163402;R-HSA-163432;R-HSA-163416;R-HSA-5334794;R-HSA-163551;R-HSA-163549
R-HSA-381340	Transcriptional regulation of white adipocyte differentiation	5	104	0.00817096	0.00109435	0.136794	4	18	0.0018009	9606	Homo sapiens	WNT10B;FABP4;PLIN1		R-HSA-560491;R-HSA-560493;R-HSA-560510;R-HSA-381309
R-HSA-5173105	O-linked glycosylation	5	133	0.0104494	0.0031685	0.265601	3	26	0.0026013	9606	Homo sapiens	ADAMTS16;ADAMTSL1;WBSCR17;GALNTL1		R-HSA-5173005;R-HSA-5173192;R-HSA-913675
R-HSA-2855086	Ficolins bind to repetitive carbohydrate structures on the target cell surface	2	12	0.000942803	0.00366769	0.265601	2	3	0.00030015	9606	Homo sapiens	FCN1		R-HSA-2855054;R-HSA-2855125
R-HSA-166662	Lectin pathway of complement activation	2	13	0.00102137	0.00428389	0.265601	3	5	0.00050025	9606	Homo sapiens	FCN1		R-HSA-166726;R-HSA-2855054;R-HSA-2855125
R-HSA-5661231	Metallothioneins bind metals	2	16	0.00125707	0.0063968	0.30065	5	27	0.00270135	9606	Homo sapiens	MT1A;MT1G		R-HSA-5661219;R-HSA-5661217;R-HSA-5661230;R-HSA-5662618;R-HSA-5662617
R-HSA-5660526	Response to metal ions	2	16	0.00125707	0.0063968	0.30065	5	27	0.00270135	9606	Homo sapiens	MT1A;MT1G		R-HSA-5661219;R-HSA-5661217;R-HSA-5661230;R-HSA-5662618;R-HSA-5662617
R-HSA-1483166	Synthesis of PA	3	54	0.00424261	0.00768117	0.314928	2	14	0.0014007	9606	Homo sapiens	PLA2G1B;GPD1		R-HSA-75889;R-HSA-1602446
R-HSA-202733	Cell surface interactions at the vascular wall	4	114	0.00895663	0.0103677	0.383604	2	55	0.00550275	9606	Homo sapiens	SELPLG;SELE		R-HSA-2870221;R-HSA-202724
R-HSA-381426	Regulation of Insulin-like Growth Factor (IGF) transport and uptake by Insulin-like Growth Factor Binding Proteins (IGFBPs)	2	22	0.00172847	0.0117528	0.399597	1	13	0.00130065	9606	Homo sapiens	KLK1		R-HSA-381466
R-HSA-375276	Peptide ligand-binding receptors	5	191	0.0150063	0.0138948	0.416381	6	70	0.0070035	9606	Homo sapiens	DARC;CCL21;CCL4;PENK;BDKRB1		R-HSA-373061;R-HSA-373071;R-HSA-443978;R-HSA-374251;R-HSA-374331;R-HSA-374298
R-HSA-913709	O-linked glycosylation of mucins	3	74	0.00581395	0.0177949	0.416381	1	17	0.00170085	9606	Homo sapiens	WBSCR17;GALNTL1		R-HSA-913675
R-HSA-879518	Transport of organic anions	2	28	0.00219987	0.0185025	0.416381	3	8	0.0008004	9606	Homo sapiens	SLCO1B3		R-HSA-194083;R-HSA-879575;R-HSA-194079
R-HSA-5669034	TNFs bind their physiological receptors	2	30	0.00235701	0.0210397	0.416381	1	13	0.00130065	9606	Homo sapiens	TNFRSF8		R-HSA-8856189
R-HSA-205017	NFG and proNGF binds to p75NTR	1	3	0.000235701	0.0219148	0.416381	2	2	0.0002001	9606	Homo sapiens	NGF		R-HSA-193653;R-HSA-193642
R-HSA-5660686	Variant SLC6A20 contributes towards hyperglycinuria (HG) and iminoglycinuria (IG)	1	3	0.000235701	0.0219148	0.416381	1	1	0.00010005	9606	Homo sapiens	SLC6A20		R-HSA-5660694
R-HSA-5619101	Variant SLC6A20 contributes towards hyperglycinuria (HG) and iminoglycinuria (IG)	1	3	0.000235701	0.0219148	0.416381	1	1	0.00010005	9606	Homo sapiens	SLC6A20		R-HSA-5660694
R-HSA-432030	Transport of glycerol from adipocytes to the liver by Aquaporins	1	3	0.000235701	0.0219148	0.416381	1	2	0.0002001	9606	Homo sapiens	AQP7		R-HSA-432074
R-HSA-5619058	Defective SLCO1B3 causes hyperbilirubinemia, Rotor type (HBLRR)	1	4	0.000314268	0.0291136	0.451254	1	1	0.00010005	9606	Homo sapiens	SLCO1B3		R-HSA-5661198
R-HSA-174800	Chylomicron-mediated lipid transport	2	36	0.00282841	0.0294493	0.451254	1	20	0.002001	9606	Homo sapiens	CIDEC		R-HSA-6784622
R-HSA-159418	Recycling of bile acids and salts	2	37	0.00290698	0.0309616	0.451254	2	12	0.0012006	9606	Homo sapiens	SLCO1B3		R-HSA-194083;R-HSA-194079
R-HSA-5083635	Defective B3GALTL causes Peters-plus syndrome (PpS)	2	39	0.00306411	0.0340763	0.451254	1	1	0.00010005	9606	Homo sapiens	ADAMTS16;ADAMTSL1		R-HSA-6785565
R-HSA-167060	NGF processing	1	5	0.000392835	0.03626	0.451254	5	5	0.00050025	9606	Homo sapiens	NGF		R-HSA-167014;R-HSA-167047;R-HSA-187045;R-HSA-187035;R-HSA-187020
R-HSA-187042	TRKA activation by NGF	1	5	0.000392835	0.03626	0.451254	4	4	0.0004002	9606	Homo sapiens	NGF		R-HSA-166544;R-HSA-190065;R-HSA-166538;R-HSA-166542
R-HSA-198745	Signalling to STAT3	1	5	0.000392835	0.03626	0.451254	1	1	0.00010005	9606	Homo sapiens	NGF		R-HSA-198732
R-HSA-5173214	O-glycosylation of TSR domain-containing proteins	2	41	0.00322124	0.0373077	0.451254	2	2	0.0002001	9606	Homo sapiens	ADAMTS16;ADAMTSL1		R-HSA-5173005;R-HSA-5173192
R-HSA-205025	NADE modulates death signalling	1	6	0.000471402	0.0433543	0.451254	3	3	0.00030015	9606	Homo sapiens	NGF		R-HSA-193650;R-HSA-204981;R-HSA-205117
R-HSA-209563	Axonal growth stimulation	1	6	0.000471402	0.0433543	0.451254	1	2	0.0002001	9606	Homo sapiens	NGF		R-HSA-193646
R-HSA-193670	p75NTR negatively regulates cell cycle via SC1	1	6	0.000471402	0.0433543	0.451254	1	3	0.00030015	9606	Homo sapiens	NGF		R-HSA-193643
R-HSA-380108	Chemokine receptors bind chemokines	2	48	0.00377121	0.0494799	0.451254	3	18	0.0018009	9606	Homo sapiens	CCL21;CCL4		R-HSA-373061;R-HSA-373071;R-HSA-443978
R-HSA-420597	Nectin/Necl trans heterodimerization	1	7	0.000549969	0.050397	0.451254	3	8	0.0008004	9606	Homo sapiens	CADM3		R-HSA-420582;R-HSA-420586;R-HSA-420584
R-HSA-1839126	FGFR2 mutant receptor activation	2	49	0.00384978	0.0513219	0.451254	4	18	0.0018009	9606	Homo sapiens	MT1A;FGF18		R-HSA-2033486;R-HSA-8851710;R-HSA-2033472;R-HSA-2077424
R-HSA-193681	Ceramide signalling	1	8	0.000628536	0.0573884	0.451254	1	2	0.0002001	9606	Homo sapiens	NGF		R-HSA-193672
R-HSA-373076	Class A/1 (Rhodopsin-like receptors)	6	390	0.0306411	0.0692683	0.451254	7	137	0.0137069	9606	Homo sapiens	DARC;SUCNR1;CCL21;CCL4;PENK;BDKRB1		R-HSA-373061;R-HSA-3296244;R-HSA-373071;R-HSA-443978;R-HSA-374251;R-HSA-374331;R-HSA-374298
R-HSA-190371	FGFR3b ligand binding and activation	1	10	0.000785669	0.0712187	0.451254	2	2	0.0002001	9606	Homo sapiens	FGF18		R-HSA-190385;R-HSA-190263
R-HSA-1300644	Interaction With The Zona Pellucida	1	10	0.000785669	0.0712187	0.451254	1	1	0.00010005	9606	Homo sapiens	CHIT1		R-HSA-1297338
R-HSA-187015	Activation of TRKA receptors	1	10	0.000785669	0.0712187	0.451254	4	6	0.0006003	9606	Homo sapiens	NGF		R-HSA-166544;R-HSA-190065;R-HSA-166538;R-HSA-166542
R-HSA-5655253	Signaling by FGFR2 in disease	2	63	0.00494972	0.0794727	0.451254	14	28	0.0028014	9606	Homo sapiens	MT1A;FGF18		R-HSA-5654748;R-HSA-5655323;R-HSA-5655320;R-HSA-2077424;R-HSA-2033486;R-HSA-5655268;R-HSA-5655301;R-HSA-5655233;R-HSA-8851710;R-HSA-5655343;R-HSA-5655245;R-HSA-5655339;R-HSA-5655241;R-HSA-2033472
R-HSA-1483206	Glycerophospholipid biosynthesis	4	225	0.0176776	0.0858026	0.451254	8	135	0.0135068	9606	Homo sapiens	DGAT2;PLA2G1B;GPD1		R-HSA-75889;R-HSA-1602377;R-HSA-1602398;R-HSA-1602446;R-HSA-1602368;R-HSA-1602417;R-HSA-1602374;R-HSA-1482889
R-HSA-75109	Triglyceride Biosynthesis	3	142	0.0111565	0.0884427	0.451254	2	39	0.00390195	9606	Homo sapiens	DGAT2;GPD1		R-HSA-75889;R-HSA-549192
R-HSA-193697	p75NTR regulates axonogenesis	1	13	0.00102137	0.0915885	0.451254	1	7	0.00070035	9606	Homo sapiens	NGF		R-HSA-193646
R-HSA-418594	G alpha (i) signalling events	5	326	0.0256128	0.0942065	0.451254	3	8	0.0008004	9606	Homo sapiens	SUCNR1;CCL21;CCL4;PENK;BDKRB1		R-HSA-749454;R-HSA-749456;R-HSA-380073
R-HSA-5658623	FGFRL1 modulation of FGFR1 signaling	1	14	0.00109994	0.0982798	0.451254	1	2	0.0002001	9606	Homo sapiens	FGF18		R-HSA-5654511
R-HSA-196819	Vitamin B1 (thiamin) metabolism	1	14	0.00109994	0.0982798	0.451254	1	5	0.00050025	9606	Homo sapiens	SLC19A3		R-HSA-199626
R-HSA-209560	NF-kB is activated and signals survival	1	15	0.0011785	0.104922	0.451254	2	4	0.0004002	9606	Homo sapiens	NGF		R-HSA-193703;R-HSA-193705
R-HSA-1650814	Collagen biosynthesis and modifying enzymes	2	76	0.00597109	0.108901	0.451254	2	15	0.00150075	9606	Homo sapiens	GLT25D2;PCOLCE2		R-HSA-2002440;R-HSA-1981120
R-HSA-3906995	Diseases associated with O-glycosylation of proteins	2	76	0.00597109	0.108901	0.451254	1	9	0.00090045	9606	Homo sapiens	ADAMTS16;ADAMTSL1		R-HSA-6785565
R-HSA-209543	p75NTR recruits signalling complexes	1	16	0.00125707	0.111516	0.451254	9	9	0.00090045	9606	Homo sapiens	NGF		R-HSA-193665;R-HSA-193686;R-HSA-193684;R-HSA-193656;R-HSA-193641;R-HSA-193694;R-HSA-193647;R-HSA-209566;R-HSA-193695
R-HSA-1247673	Erythrocytes take up oxygen and release carbon dioxide	1	16	0.00125707	0.111516	0.451254	1	6	0.0006003	9606	Homo sapiens	HBA2;HBA1		R-HSA-1247668
R-HSA-190375	FGFR2c ligand binding and activation	1	17	0.00133564	0.118062	0.451254	2	2	0.0002001	9606	Homo sapiens	FGF18		R-HSA-190258;R-HSA-190413
R-HSA-205043	NRIF signals cell death from the nucleus	1	17	0.00133564	0.118062	0.451254	4	7	0.00070035	9606	Homo sapiens	NGF		R-HSA-204949;R-HSA-193669;R-HSA-205112;R-HSA-193677
R-HSA-190322	FGFR4 ligand binding and activation	1	17	0.00133564	0.118062	0.451254	2	4	0.0004002	9606	Homo sapiens	FGF18		R-HSA-190326;R-HSA-190265
R-HSA-1839130	Signaling by activated point mutants of FGFR3	1	17	0.00133564	0.118062	0.451254	2	6	0.0006003	9606	Homo sapiens	FGF18		R-HSA-2012074;R-HSA-2012073
R-HSA-5654227	Phospholipase C-mediated cascade; FGFR3	1	18	0.0014142	0.124561	0.451254	3	3	0.00030015	9606	Homo sapiens	FGF18		R-HSA-5654148;R-HSA-5654224;R-HSA-5654222
R-HSA-177504	Retrograde neurotrophin signalling	1	18	0.0014142	0.124561	0.451254	3	3	0.00030015	9606	Homo sapiens	NGF		R-HSA-177491;R-HSA-177479;R-HSA-177501
R-HSA-190372	FGFR3c ligand binding and activation	1	18	0.0014142	0.124561	0.451254	2	4	0.0004002	9606	Homo sapiens	FGF18		R-HSA-190388;R-HSA-190261
R-HSA-1482883	Acyl chain remodeling of DAG and TAG	1	18	0.0014142	0.124561	0.451254	1	8	0.0008004	9606	Homo sapiens	DGAT2		R-HSA-1482889
R-HSA-5654228	Phospholipase C-mediated cascade; FGFR4	1	19	0.00149277	0.131012	0.451254	3	3	0.00030015	9606	Homo sapiens	FGF18		R-HSA-5654151;R-HSA-5654163;R-HSA-5654169
R-HSA-73780	RNA Polymerase III Chain Elongation	1	19	0.00149277	0.131012	0.451254	3	3	0.00030015	9606	Homo sapiens	MT1A		R-HSA-113446;R-HSA-113705;R-HSA-113451
R-HSA-193639	p75NTR signals via NF-kB	1	19	0.00149277	0.131012	0.451254	11	13	0.00130065	9606	Homo sapiens	NGF		R-HSA-193665;R-HSA-193686;R-HSA-193703;R-HSA-193684;R-HSA-193656;R-HSA-193641;R-HSA-193705;R-HSA-193694;R-HSA-193647;R-HSA-209566;R-HSA-193695
R-HSA-190239	FGFR3 ligand binding and activation	1	19	0.00149277	0.131012	0.451254	4	6	0.0006003	9606	Homo sapiens	FGF18		R-HSA-190385;R-HSA-190263;R-HSA-190388;R-HSA-190261
R-HSA-844456	The NLRP3 inflammasome	1	19	0.00149277	0.131012	0.451254	7	17	0.00170085	9606	Homo sapiens	NLRP3		R-HSA-873951;R-HSA-1250272;R-HSA-844440;R-HSA-1296421;R-HSA-844612;R-HSA-844610;R-HSA-1306876
R-HSA-500792	GPCR ligand binding	7	573	0.0450189	0.131424	0.451254	8	161	0.0161081	9606	Homo sapiens	WNT10B;DARC;SUCNR1;CCL21;CCL4;PENK;BDKRB1		R-HSA-373061;R-HSA-3296244;R-HSA-373071;R-HSA-443978;R-HSA-374251;R-HSA-374331;R-HSA-374298;R-HSA-201708
R-HSA-6788467	IL-6-type cytokine receptor ligand interactions	1	20	0.00157134	0.137415	0.451254	4	17	0.00170085	9606	Homo sapiens	CNTFR		R-HSA-6783556;R-HSA-5696490;R-HSA-5696491;R-HSA-6783530
R-HSA-5654738	Signaling by FGFR2	2	88	0.00691389	0.138178	0.451254	30	45	0.00450225	9606	Homo sapiens	MT1A;FGF18		R-HSA-5654614;R-HSA-5654615;R-HSA-5654612;R-HSA-5654677;R-HSA-5654608;R-HSA-5654622;R-HSA-5654620;R-HSA-5654618;R-HSA-190413;R-HSA-5654406;R-HSA-5654407;R-HSA-5654404;R-HSA-5654402;R-HSA-5654147;R-HSA-6803838;R-HSA-5654159;R-HSA-5654607;R-HSA-6803836;R-HSA-5654157;R-HSA-5654605;R-HSA-5654603;R-HSA-5654729;R-HSA-6803527;R-HSA-6803523;R-HSA-5654399;R-HSA-5654397;R-HSA-190258;R-HSA-5654562;R-HSA-565…
R-HSA-556833	Metabolism of lipids and lipoproteins	14	1389	0.109129	0.142424	0.451254	26	888	0.0888444	9606	Homo sapiens	PNLIPRP1;LIPE;DGAT2;FABP4;PLA2G1B;GPD1;SLCO1B3;PLIN1;CIDEC		R-HSA-549192;R-HSA-1602398;R-HSA-163402;R-HSA-6784622;R-HSA-163602;R-HSA-1602377;R-HSA-163539;R-HSA-1602446;R-HSA-1602368;R-HSA-163418;R-HSA-192475;R-HSA-163416;R-HSA-5334794;R-HSA-163551;R-HSA-194079;R-HSA-1602374;R-HSA-163549;R-HSA-1482889;R-HSA-163554;R-HSA-194083;R-HSA-163489;R-HSA-1602417;R-HSA-163432;R-HSA-75889;R-HSA-8856630;R-HSA-163568
R-HSA-174824	Lipoprotein metabolism	2	90	0.00707102	0.143214	0.451254	1	77	0.00770385	9606	Homo sapiens	CIDEC		R-HSA-6784622
R-HSA-432047	Passive transport by Aquaporins	1	21	0.00164991	0.143773	0.451254	4	8	0.0008004	9606	Homo sapiens	AQP7		R-HSA-507871;R-HSA-507870;R-HSA-507869;R-HSA-507868
R-HSA-189085	Digestion of dietary carbohydrate	1	21	0.00164991	0.143773	0.451254	2	11	0.00110055	9606	Homo sapiens	AMY2A		R-HSA-188979;R-HSA-191114
R-HSA-1226099	Signaling by FGFR in disease	2	92	0.00722816	0.14829	0.451254	27	106	0.0106053	9606	Homo sapiens	MT1A;FGF18		R-HSA-5655315;R-HSA-5655262;R-HSA-5654748;R-HSA-5655323;R-HSA-5655320;R-HSA-2033486;R-HSA-5655301;R-HSA-5655233;R-HSA-5655247;R-HSA-5655244;R-HSA-5655245;R-HSA-5655243;R-HSA-5655241;R-HSA-2033472;R-HSA-5655285;R-HSA-5655295;R-HSA-5655289;R-HSA-2077424;R-HSA-5655270;R-HSA-5655268;R-HSA-2077420;R-HSA-2012074;R-HSA-2012073;R-HSA-8851710;R-HSA-5655343;R-HSA-5655277;R-HSA-5655339
R-HSA-4641263	Regulation of FZD by ubiquitination	1	22	0.00172847	0.150083	0.451254	3	6	0.0006003	9606	Homo sapiens	RSPO3		R-HSA-4641206;R-HSA-4641205;R-HSA-4641246
R-HSA-400511	Synthesis, secretion, and inactivation of Glucose-dependent Insulinotropic Polypeptide (GIP)	1	22	0.00172847	0.150083	0.451254	1	6	0.0006003	9606	Homo sapiens	DPP4		R-HSA-400513
R-HSA-73980	RNA Polymerase III Transcription Termination	1	23	0.00180704	0.156348	0.451254	2	2	0.0002001	9606	Homo sapiens	MT1A		R-HSA-113449;R-HSA-113454
R-HSA-167242	Abortive elongation of HIV-1 transcript in the absence of Tat	1	24	0.00188561	0.162567	0.451254	2	2	0.0002001	9606	Homo sapiens	MT1A		R-HSA-167147;R-HSA-167087
R-HSA-5654710	PI-3K cascade:FGFR3	1	24	0.00188561	0.162567	0.451254	3	7	0.00070035	9606	Homo sapiens	FGF18		R-HSA-5654640;R-HSA-5654705;R-HSA-5654637
R-HSA-5654704	SHC-mediated cascade:FGFR3	1	25	0.00196417	0.168741	0.451254	4	4	0.0004002	9606	Homo sapiens	FGF18		R-HSA-5654646;R-HSA-5654647;R-HSA-5654625;R-HSA-5654634
R-HSA-5654221	Phospholipase C-mediated cascade; FGFR2	1	25	0.00196417	0.168741	0.451254	3	3	0.00030015	9606	Homo sapiens	FGF18		R-HSA-5654147;R-HSA-5654159;R-HSA-5654157
R-HSA-5654720	PI-3K cascade:FGFR4	1	25	0.00196417	0.168741	0.451254	6	7	0.00070035	9606	Homo sapiens	FGF18		R-HSA-5654662;R-HSA-5654659;R-HSA-5654717;R-HSA-5654669;R-HSA-5654714;R-HSA-5654667
R-HSA-8851708	Signaling by FGFR2 IIIa TM	1	25	0.00196417	0.168741	0.451254	1	2	0.0002001	9606	Homo sapiens	MT1A		R-HSA-8851710
R-HSA-1482922	Acyl chain remodelling of PI	1	25	0.00196417	0.168741	0.451254	1	6	0.0006003	9606	Homo sapiens	PLA2G1B		R-HSA-1602377
R-HSA-425397	Transport of vitamins, nucleosides, and related molecules	2	100	0.00785669	0.168936	0.451254	3	33	0.00330165	9606	Homo sapiens	SLCO1B3		R-HSA-194083;R-HSA-879575;R-HSA-194079
R-HSA-1474290	Collagen formation	2	102	0.00801383	0.174173	0.451254	2	40	0.004002	9606	Homo sapiens	GLT25D2;PCOLCE2		R-HSA-2002440;R-HSA-1981120
R-HSA-5654706	FRS-mediated FGFR3 signaling	1	26	0.00204274	0.17487	0.451254	8	8	0.0008004	9606	Homo sapiens	FGF18		R-HSA-5654631;R-HSA-5654628;R-HSA-5654416;R-HSA-5654623;R-HSA-5654413;R-HSA-5654408;R-HSA-5654409;R-HSA-5654633
R-HSA-190241	FGFR2 ligand binding and activation	1	26	0.00204274	0.17487	0.451254	2	5	0.00050025	9606	Homo sapiens	FGF18		R-HSA-190258;R-HSA-190413
R-HSA-2033514	FGFR3 mutant receptor activation	1	26	0.00204274	0.17487	0.451254	3	9	0.00090045	9606	Homo sapiens	FGF18		R-HSA-2077420;R-HSA-2012074;R-HSA-2012073
R-HSA-1480926	O2/CO2 exchange in erythrocytes	1	26	0.00204274	0.17487	0.451254	2	13	0.00130065	9606	Homo sapiens	HBA2;HBA1		R-HSA-1247668;R-HSA-1237325
R-HSA-1237044	Erythrocytes take up carbon dioxide and release oxygen	1	26	0.00204274	0.17487	0.451254	1	7	0.00070035	9606	Homo sapiens	HBA2;HBA1		R-HSA-1237325
R-HSA-1482925	Acyl chain remodelling of PG	1	26	0.00204274	0.17487	0.451254	1	10	0.0010005	9606	Homo sapiens	PLA2G1B		R-HSA-1602368
R-HSA-5668541	TNFR2 non-canonical NF-kB pathway	2	104	0.00817096	0.179437	0.451254	1	43	0.00430215	9606	Homo sapiens	TNFRSF8		R-HSA-8856189
R-HSA-5654712	FRS-mediated FGFR4 signaling	1	27	0.00212131	0.180954	0.451254	8	8	0.0008004	9606	Homo sapiens	FGF18		R-HSA-5654422;R-HSA-5654663;R-HSA-5654418;R-HSA-5654658;R-HSA-5654655;R-HSA-5654653;R-HSA-5654651;R-HSA-5654664
R-HSA-77075	RNA Pol II CTD phosphorylation and interaction with CE	1	27	0.00212131	0.180954	0.451254	5	5	0.00050025	9606	Homo sapiens	MT1A		R-HSA-77073;R-HSA-113430;R-HSA-77069;R-HSA-77068;R-HSA-77071
R-HSA-167160	RNA Pol II CTD phosphorylation and interaction with CE	1	27	0.00212131	0.180954	0.451254	5	5	0.00050025	9606	Homo sapiens	MT1A		R-HSA-167153;R-HSA-167111;R-HSA-167098;R-HSA-167128;R-HSA-167133
R-HSA-76066	RNA Polymerase III Transcription Initiation From Type 2 Promoter	1	27	0.00212131	0.180954	0.451254	2	4	0.0004002	9606	Homo sapiens	MT1A		R-HSA-112150;R-HSA-83805
R-HSA-3238698	WNT ligand biogenesis and trafficking	1	28	0.00219987	0.186993	0.451254	8	12	0.0012006	9606	Homo sapiens	WNT10B		R-HSA-3247840;R-HSA-3238691;R-HSA-3247843;R-HSA-3247844;R-HSA-3238694;R-HSA-3781941;R-HSA-3247837;R-HSA-3781943
R-HSA-76071	RNA Polymerase III Transcription Initiation From Type 3 Promoter	1	28	0.00219987	0.186993	0.451254	2	4	0.0004002	9606	Homo sapiens	MT1A		R-HSA-112152;R-HSA-83803
R-HSA-76061	RNA Polymerase III Transcription Initiation From Type 1 Promoter	1	28	0.00219987	0.186993	0.451254	2	5	0.00050025	9606	Homo sapiens	MT1A		R-HSA-76056;R-HSA-76060
R-HSA-2033519	Activated point mutants of FGFR2	1	28	0.00219987	0.186993	0.451254	3	10	0.0010005	9606	Homo sapiens	FGF18		R-HSA-2033486;R-HSA-2033472;R-HSA-2077424
R-HSA-190236	Signaling by FGFR	2	107	0.00840666	0.187378	0.451254	80	138	0.0138069	9606	Homo sapiens	MT1A;FGF18		R-HSA-5654614;R-HSA-5654615;R-HSA-5654612;R-HSA-5654224;R-HSA-5654608;R-HSA-5654622;R-HSA-5654623;R-HSA-5654620;R-HSA-5654618;R-HSA-5654222;R-HSA-5654734;R-HSA-6803838;R-HSA-5654607;R-HSA-6803836;R-HSA-5654605;R-HSA-5654603;R-HSA-5654729;R-HSA-6803527;R-HSA-5654646;R-HSA-5654647;R-HSA-6803523;R-HSA-5654640;R-HSA-5654655;R-HSA-5654399;R-HSA-5654653;R-HSA-5654397;R-HSA-5654651;R-HSA-190258;R-HSA-56…
R-HSA-6803529	FGFR2 alternative splicing	1	29	0.00227844	0.192989	0.451254	4	4	0.0004002	9606	Homo sapiens	MT1A		R-HSA-6803527;R-HSA-6803523;R-HSA-6803838;R-HSA-6803836
R-HSA-5654719	SHC-mediated cascade:FGFR4	1	29	0.00227844	0.192989	0.451254	4	4	0.0004002	9606	Homo sapiens	FGF18		R-HSA-5654423;R-HSA-5654428;R-HSA-5654426;R-HSA-5654425
R-HSA-5621575	CD209 (DC-SIGN) signaling	1	29	0.00227844	0.192989	0.451254	4	11	0.00110055	9606	Homo sapiens	CD209		R-HSA-5621573;R-HSA-5621606;R-HSA-5621571;R-HSA-5621615
R-HSA-622312	Inflammasomes	1	29	0.00227844	0.192989	0.451254	7	27	0.00270135	9606	Homo sapiens	NLRP3		R-HSA-873951;R-HSA-1250272;R-HSA-844440;R-HSA-1296421;R-HSA-844612;R-HSA-844610;R-HSA-1306876
R-HSA-203927	MicroRNA (miRNA) biogenesis	1	29	0.00227844	0.192989	0.451254	1	7	0.00070035	9606	Homo sapiens	MT1A		R-HSA-203901
R-HSA-1483257	Phospholipid metabolism	4	311	0.0244343	0.198218	0.451254	8	201	0.0201101	9606	Homo sapiens	DGAT2;PLA2G1B;GPD1		R-HSA-75889;R-HSA-1602377;R-HSA-1602398;R-HSA-1602446;R-HSA-1602368;R-HSA-1602417;R-HSA-1602374;R-HSA-1482889
R-HSA-73772	RNA Polymerase I Promoter Escape	1	30	0.00235701	0.198941	0.451254	1	1	0.00010005	9606	Homo sapiens	MT1A		R-HSA-73769
R-HSA-5576894	Phase 1 - inactivation of fast Na+ channels	1	30	0.00235701	0.198941	0.451254	1	2	0.0002001	9606	Homo sapiens	KCNIP2		R-HSA-5577234
R-HSA-5654695	PI-3K cascade:FGFR2	1	31	0.00243558	0.204849	0.451254	6	7	0.00070035	9606	Homo sapiens	FGF18		R-HSA-5654614;R-HSA-5654612;R-HSA-5654622;R-HSA-5654620;R-HSA-5654701;R-HSA-5654697
R-HSA-1482801	Acyl chain remodelling of PS	1	31	0.00243558	0.204849	0.451254	1	8	0.0008004	9606	Homo sapiens	PLA2G1B		R-HSA-1602374
R-HSA-1474165	Reproduction	1	31	0.00243558	0.204849	0.451254	1	9	0.00090045	9606	Homo sapiens	CHIT1		R-HSA-1297338
R-HSA-1187000	Fertilization	1	31	0.00243558	0.204849	0.451254	1	9	0.00090045	9606	Homo sapiens	CHIT1		R-HSA-1297338
R-HSA-73863	RNA Polymerase I Transcription Termination	1	32	0.00251414	0.210714	0.451254	3	4	0.0004002	9606	Homo sapiens	MT1A		R-HSA-74993;R-HSA-74992;R-HSA-74994
R-HSA-5689901	Metalloprotease DUBs	1	32	0.00251414	0.210714	0.451254	1	6	0.0006003	9606	Homo sapiens	NLRP3		R-HSA-5691439
R-HSA-6783589	Interleukin-6 family signaling	1	32	0.00251414	0.210714	0.451254	4	36	0.0036018	9606	Homo sapiens	CNTFR		R-HSA-6783556;R-HSA-5696490;R-HSA-5696491;R-HSA-6783530
R-HSA-5654700	FRS-mediated FGFR2 signaling	1	33	0.00259271	0.216537	0.451254	8	8	0.0008004	9606	Homo sapiens	FGF18		R-HSA-5654615;R-HSA-5654608;R-HSA-5654399;R-HSA-5654607;R-HSA-5654605;R-HSA-5654397;R-HSA-5654618;R-HSA-5654603
R-HSA-5601884	PIWI-interacting RNA (piRNA) biogenesis	1	33	0.00259271	0.216537	0.451254	1	16	0.0016008	9606	Homo sapiens	MT1A		R-HSA-5601926
R-HSA-194068	Bile acid and bile salt metabolism	2	120	0.00942803	0.222285	0.451254	2	94	0.0094047	9606	Homo sapiens	SLCO1B3		R-HSA-194083;R-HSA-194079
R-HSA-167158	Formation of the HIV-1 Early Elongation Complex	1	34	0.00267128	0.222317	0.451254	5	5	0.00050025	9606	Homo sapiens	MT1A		R-HSA-167072;R-HSA-167089;R-HSA-167478;R-HSA-167083;R-HSA-167085
R-HSA-113418	Formation of the Early Elongation Complex	1	34	0.00267128	0.222317	0.451254	3	3	0.00030015	9606	Homo sapiens	MT1A		R-HSA-113402;R-HSA-112383;R-HSA-113407
R-HSA-5654708	Downstream signaling of activated FGFR3	1	34	0.00267128	0.222317	0.451254	18	22	0.0022011	9606	Homo sapiens	FGF18		R-HSA-5654646;R-HSA-5654647;R-HSA-5654224;R-HSA-5654640;R-HSA-5654416;R-HSA-5654705;R-HSA-5654623;R-HSA-5654631;R-HSA-5654148;R-HSA-5654628;R-HSA-5654625;R-HSA-5654222;R-HSA-5654637;R-HSA-5654413;R-HSA-5654634;R-HSA-5654408;R-HSA-5654409;R-HSA-5654633
R-HSA-5654732	Negative regulation of FGFR3 signaling	1	34	0.00267128	0.222317	0.451254	1	14	0.0014007	9606	Homo sapiens	FGF18		R-HSA-5654565
R-HSA-5654699	SHC-mediated cascade:FGFR2	1	35	0.00274984	0.228054	0.451254	4	4	0.0004002	9606	Homo sapiens	FGF18		R-HSA-5654406;R-HSA-5654407;R-HSA-5654404;R-HSA-5654402
R-HSA-5654716	Downstream signaling of activated FGFR4	1	35	0.00274984	0.228054	0.451254	21	22	0.0022011	9606	Homo sapiens	FGF18		R-HSA-5654422;R-HSA-5654423;R-HSA-5654418;R-HSA-5654163;R-HSA-5654655;R-HSA-5654428;R-HSA-5654717;R-HSA-5654653;R-HSA-5654714;R-HSA-5654426;R-HSA-5654651;R-HSA-5654169;R-HSA-5654425;R-HSA-5654662;R-HSA-5654151;R-HSA-5654663;R-HSA-5654658;R-HSA-5654659;R-HSA-5654669;R-HSA-5654667;R-HSA-5654664
R-HSA-418990	Adherens junctions interactions	1	35	0.00274984	0.228054	0.451254	4	16	0.0016008	9606	Homo sapiens	CADM3		R-HSA-420582;R-HSA-420592;R-HSA-420586;R-HSA-420584
R-HSA-5654733	Negative regulation of FGFR4 signaling	1	35	0.00274984	0.228054	0.451254	3	14	0.0014007	9606	Homo sapiens	FGF18		R-HSA-5654566;R-HSA-5654734;R-HSA-5654684
R-HSA-167243	Tat-mediated HIV elongation arrest and recovery	1	36	0.00282841	0.23375	0.451254	3	3	0.00030015	9606	Homo sapiens	MT1A		R-HSA-167090;R-HSA-167459;R-HSA-167148
R-HSA-167238	Pausing and recovery of Tat-mediated HIV elongation	1	36	0.00282841	0.23375	0.451254	2	2	0.0002001	9606	Homo sapiens	MT1A		R-HSA-167076;R-HSA-167150
R-HSA-72086	mRNA Capping	1	36	0.00282841	0.23375	0.451254	10	11	0.00110055	9606	Homo sapiens	MT1A		R-HSA-77073;R-HSA-77090;R-HSA-77077;R-HSA-77095;R-HSA-77078;R-HSA-77081;R-HSA-77083;R-HSA-77085;R-HSA-77069;R-HSA-77068
R-HSA-76046	RNA Polymerase III Transcription Initiation	1	36	0.00282841	0.23375	0.451254	6	13	0.00130065	9606	Homo sapiens	MT1A		R-HSA-112150;R-HSA-76056;R-HSA-112152;R-HSA-83803;R-HSA-83805;R-HSA-76060
R-HSA-392154	Nitric oxide stimulates guanylate cyclase	1	36	0.00282841	0.23375	0.451254	1	7	0.00070035	9606	Homo sapiens	NOS2		R-HSA-418436
R-HSA-167287	HIV elongation arrest and recovery	1	37	0.00290698	0.239405	0.451254	3	3	0.00030015	9606	Homo sapiens	MT1A		R-HSA-167284;R-HSA-167288;R-HSA-167481
R-HSA-167290	Pausing and recovery of HIV elongation	1	37	0.00290698	0.239405	0.451254	2	2	0.0002001	9606	Homo sapiens	MT1A		R-HSA-167282;R-HSA-167292
R-HSA-8853338	Signaling by FGFR3 point mutants in cancer	1	40	0.00314268	0.256121	0.451254	13	19	0.00190095	9606	Homo sapiens	FGF18		R-HSA-5655285;R-HSA-5655315;R-HSA-5655262;R-HSA-5655295;R-HSA-5655289;R-HSA-5655270;R-HSA-2077420;R-HSA-2012074;R-HSA-2012073;R-HSA-5655247;R-HSA-5655244;R-HSA-5655277;R-HSA-5655243
R-HSA-5655332	Signaling by FGFR3 in disease	1	40	0.00314268	0.256121	0.451254	13	28	0.0028014	9606	Homo sapiens	FGF18		R-HSA-5655285;R-HSA-5655315;R-HSA-5655262;R-HSA-5655295;R-HSA-5655289;R-HSA-5655270;R-HSA-2077420;R-HSA-2012074;R-HSA-2012073;R-HSA-5655247;R-HSA-5655244;R-HSA-5655277;R-HSA-5655243
R-HSA-1482788	Acyl chain remodelling of PC	1	40	0.00314268	0.256121	0.451254	1	9	0.00090045	9606	Homo sapiens	PLA2G1B		R-HSA-1602417
R-HSA-192456	Digestion of dietary lipid	1	40	0.00314268	0.256121	0.451254	1	13	0.00130065	9606	Homo sapiens	PNLIPRP1		R-HSA-192475
R-HSA-5654696	Downstream signaling of activated FGFR2	1	41	0.00322124	0.261612	0.451254	21	22	0.0022011	9606	Homo sapiens	FGF18		R-HSA-5654614;R-HSA-5654615;R-HSA-5654612;R-HSA-5654608;R-HSA-5654622;R-HSA-5654399;R-HSA-5654620;R-HSA-5654397;R-HSA-5654618;R-HSA-5654406;R-HSA-5654407;R-HSA-5654404;R-HSA-5654402;R-HSA-5654147;R-HSA-5654159;R-HSA-5654607;R-HSA-5654157;R-HSA-5654701;R-HSA-5654605;R-HSA-5654603;R-HSA-5654697
R-HSA-5654727	Negative regulation of FGFR2 signaling	1	41	0.00322124	0.261612	0.451254	3	14	0.0014007	9606	Homo sapiens	FGF18		R-HSA-5654677;R-HSA-5654562;R-HSA-5654729
R-HSA-1482839	Acyl chain remodelling of PE	1	42	0.00329981	0.267063	0.451254	1	9	0.00090045	9606	Homo sapiens	PLA2G1B		R-HSA-1602398
R-HSA-749476	RNA Polymerase III Abortive And Retractive Initiation	1	43	0.00337838	0.272474	0.451254	13	13	0.00130065	9606	Homo sapiens	MT1A		R-HSA-113442;R-HSA-113449;R-HSA-113705;R-HSA-113454;R-HSA-112149;R-HSA-112055;R-HSA-112150;R-HSA-112054;R-HSA-112153;R-HSA-112152;R-HSA-112155;R-HSA-76060;R-HSA-112156
R-HSA-74158	RNA Polymerase III Transcription	1	43	0.00337838	0.272474	0.451254	18	25	0.00250125	9606	Homo sapiens	MT1A		R-HSA-113442;R-HSA-113446;R-HSA-113449;R-HSA-113705;R-HSA-113451;R-HSA-113454;R-HSA-112149;R-HSA-112055;R-HSA-112150;R-HSA-112054;R-HSA-112153;R-HSA-76056;R-HSA-112152;R-HSA-83803;R-HSA-112155;R-HSA-83805;R-HSA-76060;R-HSA-112156
R-HSA-381771	Synthesis, secretion, and inactivation of Glucagon-like Peptide-1 (GLP-1)	1	43	0.00337838	0.272474	0.451254	1	6	0.0006003	9606	Homo sapiens	DPP4		R-HSA-400495
R-HSA-3769402	Deactivation of the beta-catenin transactivating complex	1	44	0.00345695	0.277845	0.451254	2	14	0.0014007	9606	Homo sapiens	SOX17		R-HSA-5665608;R-HSA-5626938
R-HSA-73779	RNA Polymerase II Transcription Pre-Initiation And Promoter Opening	1	46	0.00361408	0.288471	0.451254	3	5	0.00050025	9606	Homo sapiens	MT1A		R-HSA-75095;R-HSA-109639;R-HSA-109638
R-HSA-400508	Incretin synthesis, secretion, and inactivation	1	47	0.00369265	0.293725	0.451254	2	12	0.0012006	9606	Homo sapiens	DPP4		R-HSA-400513;R-HSA-400495
R-HSA-167021	PLC-gamma1 signalling	1	47	0.00369265	0.293725	0.451254	2	19	0.00190095	9606	Homo sapiens	NGF		R-HSA-167684;R-HSA-167674
R-HSA-167162	RNA Polymerase II HIV Promoter Escape	1	48	0.00377121	0.298942	0.451254	7	7	0.00070035	9606	Homo sapiens	MT1A		R-HSA-167474;R-HSA-167136;R-HSA-167121;R-HSA-167115;R-HSA-167113;R-HSA-167468;R-HSA-167117
R-HSA-73776	RNA Polymerase II Promoter Escape	1	48	0.00377121	0.298942	0.451254	5	5	0.00050025	9606	Homo sapiens	MT1A		R-HSA-75873;R-HSA-111264;R-HSA-76576;R-HSA-75850;R-HSA-75869
R-HSA-167161	HIV Transcription Initiation	1	48	0.00377121	0.298942	0.451254	4	4	0.0004002	9606	Homo sapiens	MT1A		R-HSA-167477;R-HSA-167130;R-HSA-167134;R-HSA-167118
R-HSA-75953	RNA Polymerase II Transcription Initiation	1	48	0.00377121	0.298942	0.451254	3	3	0.00030015	9606	Homo sapiens	MT1A		R-HSA-75861;R-HSA-75864;R-HSA-75866
R-HSA-167152	Formation of HIV elongation complex in the absence of HIV Tat	1	48	0.00377121	0.298942	0.451254	2	2	0.0002001	9606	Homo sapiens	MT1A		R-HSA-167077;R-HSA-167084
R-HSA-5619102	SLC transporter disorders	2	149	0.0117065	0.301334	0.451254	2	65	0.00650325	9606	Homo sapiens	SLCO1B3;SLC6A20		R-HSA-5660694;R-HSA-5661198
R-HSA-167200	Formation of HIV-1 elongation complex containing HIV-1 Tat	1	49	0.00384978	0.30412	0.451254	4	5	0.00050025	9606	Homo sapiens	MT1A		R-HSA-170706;R-HSA-170704;R-HSA-167191;R-HSA-167196
R-HSA-5625886	Activated PKN1 stimulates transcription of AR (androgen receptor) regulated genes KLK2 and KLK3	1	49	0.00384978	0.30412	0.451254	1	11	0.00110055	9606	Homo sapiens	KLK1		R-HSA-5625883
R-HSA-167169	HIV Transcription Elongation	1	50	0.00392835	0.30926	0.451254	14	15	0.00150075	9606	Homo sapiens	MT1A		R-HSA-167072;R-HSA-167147;R-HSA-167083;R-HSA-167087;R-HSA-167181;R-HSA-167085;R-HSA-170706;R-HSA-170704;R-HSA-167089;R-HSA-167478;R-HSA-167191;R-HSA-167192;R-HSA-167196;R-HSA-167197
R-HSA-167246	Tat-mediated elongation of the HIV-1 transcript	1	50	0.00392835	0.30926	0.451254	7	8	0.0008004	9606	Homo sapiens	MT1A		R-HSA-170706;R-HSA-170704;R-HSA-167191;R-HSA-167192;R-HSA-167196;R-HSA-167181;R-HSA-167197
R-HSA-5654743	Signaling by FGFR4	1	50	0.00392835	0.30926	0.451254	26	40	0.004002	9606	Homo sapiens	FGF18		R-HSA-5654422;R-HSA-5654423;R-HSA-5654418;R-HSA-5654163;R-HSA-5654684;R-HSA-5654428;R-HSA-5654426;R-HSA-5654169;R-HSA-5654425;R-HSA-5654662;R-HSA-5654151;R-HSA-5654663;R-HSA-5654658;R-HSA-5654659;R-HSA-5654734;R-HSA-5654669;R-HSA-5654667;R-HSA-5654664;R-HSA-5654655;R-HSA-5654717;R-HSA-5654653;R-HSA-5654714;R-HSA-5654651;R-HSA-5654566;R-HSA-190326;R-HSA-190265
R-HSA-73762	RNA Polymerase I Transcription Initiation	1	50	0.00392835	0.30926	0.451254	3	6	0.0006003	9606	Homo sapiens	MT1A		R-HSA-73865;R-HSA-73757;R-HSA-73758
R-HSA-3000480	Scavenging by Class A Receptors	1	50	0.00392835	0.30926	0.451254	2	10	0.0010005	9606	Homo sapiens	SCARA5		R-HSA-2187266;R-HSA-2299677
R-HSA-442660	Na+/Cl- dependent neurotransmitter transporters	1	50	0.00392835	0.30926	0.451254	1	15	0.00150075	9606	Homo sapiens	SLC6A20		R-HSA-352052
R-HSA-198203	PI3K/AKT activation	2	153	0.0120207	0.312205	0.451254	4	38	0.0038019	9606	Homo sapiens	FGF18;NGF		R-HSA-198211;R-HSA-2316434;R-HSA-198295;R-HSA-198315
R-HSA-76042	RNA Polymerase II Transcription Initiation And Promoter Clearance	1	51	0.00400691	0.314363	0.451254	9	9	0.00090045	9606	Homo sapiens	MT1A		R-HSA-75873;R-HSA-111264;R-HSA-76576;R-HSA-75861;R-HSA-75864;R-HSA-75866;R-HSA-75850;R-HSA-75949;R-HSA-75869
R-HSA-5654741	Signaling by FGFR3	1	52	0.00408548	0.319428	0.451254	23	42	0.0042021	9606	Homo sapiens	FGF18		R-HSA-5654646;R-HSA-5654647;R-HSA-5654224;R-HSA-5654640;R-HSA-5654416;R-HSA-5654705;R-HSA-5654623;R-HSA-5654631;R-HSA-5654148;R-HSA-5654628;R-HSA-5654565;R-HSA-190385;R-HSA-190263;R-HSA-190388;R-HSA-5654625;R-HSA-190261;R-HSA-5654222;R-HSA-5654637;R-HSA-5654413;R-HSA-5654634;R-HSA-5654408;R-HSA-5654409;R-HSA-5654633
R-HSA-6781823	Formation of TC-NER Pre-Incision Complex	1	56	0.00439975	0.339322	0.451254	7	7	0.00070035	9606	Homo sapiens	MT1A		R-HSA-6782069;R-HSA-6782004;R-HSA-6781840;R-HSA-6781824;R-HSA-6781867;R-HSA-6781818;R-HSA-6781833
R-HSA-72165	mRNA Splicing - Minor Pathway	1	56	0.00439975	0.339322	0.451254	5	5	0.00050025	9606	Homo sapiens	MT1A		R-HSA-75079;R-HSA-75081;R-HSA-75080;R-HSA-75083;R-HSA-75082
R-HSA-452723	Transcriptional regulation of pluripotent stem cells	1	56	0.00439975	0.339322	0.451254	5	35	0.00350175	9606	Homo sapiens	MT1A		R-HSA-452838;R-HSA-452894;R-HSA-480301;R-HSA-452392;R-HSA-480520
R-HSA-1222556	ROS, RNS production in response to bacteria	1	57	0.00447832	0.344205	0.451254	1	16	0.0016008	9606	Homo sapiens	NOS2		R-HSA-418436
R-HSA-112382	Formation of RNA Pol II elongation complex	1	61	0.00479258	0.363382	0.451254	2	2	0.0002001	9606	Homo sapiens	MT1A		R-HSA-112379;R-HSA-112381
R-HSA-73777	RNA Polymerase I Chain Elongation	1	61	0.00479258	0.363382	0.451254	1	1	0.00010005	9606	Homo sapiens	MT1A		R-HSA-74986
R-HSA-5654736	Signaling by FGFR1	1	61	0.00479258	0.363382	0.451254	1	47	0.00470235	9606	Homo sapiens	FGF18		R-HSA-5654511
R-HSA-75955	RNA Polymerase II Transcription Elongation	1	62	0.00487115	0.368089	0.451254	8	8	0.0008004	9606	Homo sapiens	MT1A		R-HSA-112385;R-HSA-113412;R-HSA-112379;R-HSA-113402;R-HSA-112381;R-HSA-112396;R-HSA-112383;R-HSA-113407
R-HSA-5250924	B-WICH complex positively regulates rRNA expression	1	62	0.00487115	0.368089	0.451254	3	3	0.00030015	9606	Homo sapiens	MT1A		R-HSA-5250930;R-HSA-5250947;R-HSA-5250938
R-HSA-193648	NRAGE signals death through JNK	1	63	0.00494972	0.372762	0.451254	3	7	0.00070035	9606	Homo sapiens	NGF		R-HSA-205115;R-HSA-204958;R-HSA-205132
R-HSA-166786	Creation of C4 and C2 activators	2	177	0.0139063	0.376483	0.451254	3	7	0.00070035	9606	Homo sapiens	FCN1		R-HSA-166726;R-HSA-2855054;R-HSA-2855125
R-HSA-352230	Amino acid transport across the plasma membrane	1	64	0.00502828	0.3774	0.451254	1	34	0.0034017	9606	Homo sapiens	SLC6A20		R-HSA-352052
R-HSA-421270	Cell-cell junction organization	1	65	0.00510685	0.382004	0.451254	4	19	0.00190095	9606	Homo sapiens	CADM3		R-HSA-420582;R-HSA-420592;R-HSA-420586;R-HSA-420584
R-HSA-168643	Nucleotide-binding domain, leucine rich repeat containing receptor (NLR) signaling pathways	1	65	0.00510685	0.382004	0.451254	7	44	0.0044022	9606	Homo sapiens	NLRP3		R-HSA-873951;R-HSA-1250272;R-HSA-844440;R-HSA-1296421;R-HSA-844612;R-HSA-844610;R-HSA-1306876
R-HSA-6782210	Gap-filling DNA repair synthesis and ligation in TC-NER	1	66	0.00518542	0.386575	0.451254	2	2	0.0002001	9606	Homo sapiens	MT1A		R-HSA-6782227;R-HSA-6782208
R-HSA-445717	Aquaporin-mediated transport	1	67	0.00526398	0.391112	0.451254	5	24	0.0024012	9606	Homo sapiens	AQP7		R-HSA-507871;R-HSA-507870;R-HSA-507869;R-HSA-507868;R-HSA-432074
R-HSA-168325	Viral Messenger RNA Synthesis	1	67	0.00526398	0.391112	0.451254	1	7	0.00070035	9606	Homo sapiens	MT1A		R-HSA-168326
R-HSA-6782135	Dual incision in TC-NER	1	68	0.00534255	0.395616	0.451254	6	6	0.0006003	9606	Homo sapiens	MT1A		R-HSA-6782131;R-HSA-6782211;R-HSA-6782224;R-HSA-6782141;R-HSA-6782204;R-HSA-6782138
R-HSA-166663	Initial triggering of complement	2	188	0.0147706	0.405167	0.451254	5	20	0.002001	9606	Homo sapiens	FCN1		R-HSA-166753;R-HSA-166726;R-HSA-2855054;R-HSA-166792;R-HSA-2855125
R-HSA-3781865	Diseases of glycosylation	2	190	0.0149277	0.410318	0.451254	1	58	0.0058029	9606	Homo sapiens	ADAMTS16;ADAMTSL1		R-HSA-6785565
R-HSA-1474244	Extracellular matrix organization	3	320	0.0251414	0.421883	0.451254	3	275	0.0275138	9606	Homo sapiens	ADAMTS16;GLT25D2;PCOLCE2		R-HSA-2002440;R-HSA-1592310;R-HSA-1981120
R-HSA-167172	Transcription of the HIV genome	1	78	0.00612822	0.438883	0.451254	44	45	0.00450225	9606	Homo sapiens	MT1A		R-HSA-167111;R-HSA-167115;R-HSA-167113;R-HSA-167118;R-HSA-167181;R-HSA-167117;R-HSA-170706;R-HSA-170704;R-HSA-167121;R-HSA-167191;R-HSA-167130;R-HSA-167192;R-HSA-167128;R-HSA-167134;R-HSA-167196;R-HSA-167197;R-HSA-167133;R-HSA-167459;R-HSA-167072;R-HSA-167136;R-HSA-167076;R-HSA-167077;R-HSA-167147;R-HSA-167083;R-HSA-167150;R-HSA-167087;R-HSA-167148;R-HSA-167084;R-HSA-167468;R-HSA-167085;R-HSA-167…
R-HSA-195721	Signaling by Wnt	3	329	0.0258485	0.439506	0.451254	13	153	0.0153077	9606	Homo sapiens	WNT10B;SOX17;RSPO3		R-HSA-3781941;R-HSA-3247837;R-HSA-3781943;R-HSA-5626938;R-HSA-4641206;R-HSA-3247840;R-HSA-3238691;R-HSA-3247843;R-HSA-4641205;R-HSA-3247844;R-HSA-3238694;R-HSA-4641246;R-HSA-5665608
R-HSA-204998	Cell death signalling via NRAGE, NRIF and NADE	1	79	0.00620679	0.443037	0.451254	10	17	0.00170085	9606	Homo sapiens	NGF		R-HSA-193650;R-HSA-204981;R-HSA-204949;R-HSA-193669;R-HSA-205115;R-HSA-205112;R-HSA-204958;R-HSA-205117;R-HSA-193677;R-HSA-205132
R-HSA-5625740	RHO GTPases activate PKNs	1	79	0.00620679	0.443037	0.451254	1	20	0.002001	9606	Homo sapiens	KLK1		R-HSA-5625883
R-HSA-5250913	Positive epigenetic regulation of rRNA expression	1	81	0.00636392	0.451254	0.451254	3	7	0.00070035	9606	Homo sapiens	MT1A		R-HSA-5250930;R-HSA-5250947;R-HSA-5250938
R-HSA-5578749	Transcriptional regulation by small RNAs	1	81	0.00636392	0.451254	0.451254	1	5	0.00050025	9606	Homo sapiens	MT1A		R-HSA-5578742
R-HSA-427413	NoRC negatively regulates rRNA expression	1	81	0.00636392	0.451254	0.451254	1	7	0.00070035	9606	Homo sapiens	MT1A		R-HSA-427366
R-HSA-73854	RNA Polymerase I Promoter Clearance	1	83	0.00652106	0.459352	0.459352	4	9	0.00090045	9606	Homo sapiens	MT1A		R-HSA-73865;R-HSA-73769;R-HSA-73757;R-HSA-73758
R-HSA-166658	Complement cascade	2	211	0.0165776	0.463023	0.463023	5	60	0.006003	9606	Homo sapiens	FCN1		R-HSA-166753;R-HSA-166726;R-HSA-2855054;R-HSA-166792;R-HSA-2855125
R-HSA-674695	RNA Polymerase II Pre-transcription Events	1	84	0.00659962	0.463356	0.463356	11	17	0.00170085	9606	Homo sapiens	MT1A		R-HSA-113409;R-HSA-75856;R-HSA-113411;R-HSA-75891;R-HSA-113429;R-HSA-113413;R-HSA-113414;R-HSA-75862;R-HSA-112392;R-HSA-112395;R-HSA-73946
R-HSA-6781827	Transcription-Coupled Nucleotide Excision Repair (TC-NER)	1	85	0.00667819	0.467331	0.467331	16	16	0.0016008	9606	Homo sapiens	MT1A		R-HSA-6782211;R-HSA-6781824;R-HSA-6782208;R-HSA-6781867;R-HSA-6781833;R-HSA-6782069;R-HSA-6782004;R-HSA-6782131;R-HSA-6782227;R-HSA-6781840;R-HSA-6782224;R-HSA-6782141;R-HSA-6782204;R-HSA-6781818;R-HSA-6782138;R-HSA-6782234
R-HSA-73864	RNA Polymerase I Transcription	1	86	0.00675676	0.471277	0.471277	8	14	0.0014007	9606	Homo sapiens	MT1A		R-HSA-74993;R-HSA-74992;R-HSA-74994;R-HSA-73865;R-HSA-73769;R-HSA-74986;R-HSA-73757;R-HSA-73758
R-HSA-1834949	Cytosolic sensors of pathogen-associated DNA	1	86	0.00675676	0.471277	0.471277	1	45	0.00450225	9606	Homo sapiens	MT1A		R-HSA-1964482
R-HSA-201681	TCF dependent signaling in response to WNT	2	215	0.0168919	0.472756	0.472756	5	71	0.00710355	9606	Homo sapiens	SOX17;RSPO3		R-HSA-4641206;R-HSA-4641205;R-HSA-4641246;R-HSA-5665608;R-HSA-5626938
R-HSA-2219530	Constitutive Signaling by Aberrant PI3K in Cancer	1	89	0.00699246	0.482942	0.482942	1	2	0.0002001	9606	Homo sapiens	FGF18		R-HSA-2400009
R-HSA-6796648	TP53 Regulates Transcription of DNA Repair Genes	1	89	0.00699246	0.482942	0.482942	3	17	0.00170085	9606	Homo sapiens	MT1A		R-HSA-6797606;R-HSA-6797712;R-HSA-6797616
R-HSA-6807505	RNA polymerase II transcribes snRNA genes	1	90	0.00707102	0.486773	0.486773	8	11	0.00110055	9606	Homo sapiens	MT1A		R-HSA-6814549;R-HSA-6814885;R-HSA-6814559;R-HSA-6810238;R-HSA-6810235;R-HSA-6814555;R-HSA-6814554;R-HSA-6810233
R-HSA-5250941	Negative epigenetic regulation of rRNA expression	1	90	0.00707102	0.486773	0.486773	1	12	0.0012006	9606	Homo sapiens	MT1A		R-HSA-427366
R-HSA-373080	Class B/2 (Secretin family receptors)	1	91	0.00714959	0.490577	0.490577	1	17	0.00170085	9606	Homo sapiens	WNT10B		R-HSA-201708
R-HSA-446728	Cell junction organization	1	92	0.00722816	0.494352	0.494352	4	35	0.00350175	9606	Homo sapiens	CADM3		R-HSA-420582;R-HSA-420592;R-HSA-420586;R-HSA-420584
R-HSA-1280215	Cytokine Signaling in Immune system	6	762	0.059868	0.496091	0.496091	10	350	0.0350175	9606	Homo sapiens	CNTFR;CSF3R;FGF18;TNFRSF8;IRF8		R-HSA-6783556;R-HSA-5672965;R-HSA-8854738;R-HSA-1015702;R-HSA-8856189;R-HSA-1031716;R-HSA-5696490;R-HSA-5696491;R-HSA-6783530;R-HSA-6787737
R-HSA-109704	PI3K Cascade	1	96	0.00754243	0.509179	0.509179	1	33	0.00330165	9606	Homo sapiens	FGF18		R-HSA-109699
R-HSA-2173782	Binding and Uptake of Ligands by Scavenger Receptors	2	236	0.0185418	0.522089	0.522089	7	32	0.0032016	9606	Homo sapiens	SCARA5;HBA2;HBA1		R-HSA-2168883;R-HSA-2187266;R-HSA-2168885;R-HSA-2168884;R-HSA-2230938;R-HSA-2168889;R-HSA-2299677
R-HSA-109582	Hemostasis	5	654	0.0513828	0.533157	0.533157	5	312	0.0312156	9606	Homo sapiens	SELPLG;NOS2;SELE		R-HSA-418436;R-HSA-481044;R-HSA-481010;R-HSA-2870221;R-HSA-202724
R-HSA-6811558	PI5P, PP2A and IER3 Regulate PI3K/AKT Signaling	1	105	0.00824953	0.540985	0.540985	1	7	0.00070035	9606	Homo sapiens	FGF18		R-HSA-2316434
R-HSA-5619115	Disorders of transmembrane transporters	2	245	0.0192489	0.542284	0.542284	2	87	0.00870435	9606	Homo sapiens	SLCO1B3;SLC6A20		R-HSA-5660694;R-HSA-5661198
R-HSA-193704	p75 NTR receptor-mediated signalling	1	107	0.00840666	0.547771	0.547771	26	49	0.00490245	9606	Homo sapiens	NGF		R-HSA-193665;R-HSA-193669;R-HSA-193672;R-HSA-193677;R-HSA-205132;R-HSA-193686;R-HSA-193684;R-HSA-204949;R-HSA-193694;R-HSA-209566;R-HSA-193695;R-HSA-204958;R-HSA-193703;R-HSA-193642;R-HSA-193643;R-HSA-193641;R-HSA-193705;R-HSA-193646;R-HSA-193647;R-HSA-193650;R-HSA-204981;R-HSA-193653;R-HSA-205115;R-HSA-193656;R-HSA-205112;R-HSA-205117
R-HSA-199418	Negative regulation of the PI3K/AKT network	1	114	0.00895663	0.57075	0.57075	1	10	0.0010005	9606	Homo sapiens	FGF18		R-HSA-2316434
R-HSA-211000	Gene Silencing by RNA	1	115	0.0090352	0.573937	0.573937	3	35	0.00350175	9606	Homo sapiens	MT1A		R-HSA-5601926;R-HSA-5578742;R-HSA-203901
R-HSA-5619507	Activation of HOX genes during differentiation	1	116	0.00911376	0.577101	0.577101	27	43	0.00430215	9606	Homo sapiens	MT1A		R-HSA-5617877;R-HSA-5617492;R-HSA-5617431;R-HSA-5621010;R-HSA-5617874;R-HSA-5617887;R-HSA-5617862;R-HSA-5617859;R-HSA-5617484;R-HSA-5617676;R-HSA-5693644;R-HSA-5617486;R-HSA-5617672;R-HSA-5617483;R-HSA-5617867;R-HSA-5621002;R-HSA-5617866;R-HSA-5617462;R-HSA-5617650;R-HSA-5617661;R-HSA-5617471;R-HSA-5617445;R-HSA-5617452;R-HSA-5617454;R-HSA-5617641;R-HSA-5617896;R-HSA-5617642
R-HSA-5617472	Activation of anterior HOX genes in hindbrain development during early embryogenesis	1	116	0.00911376	0.577101	0.577101	27	43	0.00430215	9606	Homo sapiens	MT1A		R-HSA-5617877;R-HSA-5617492;R-HSA-5617431;R-HSA-5621010;R-HSA-5617874;R-HSA-5617887;R-HSA-5617862;R-HSA-5617859;R-HSA-5617484;R-HSA-5617676;R-HSA-5693644;R-HSA-5617486;R-HSA-5617672;R-HSA-5617483;R-HSA-5617867;R-HSA-5621002;R-HSA-5617866;R-HSA-5617462;R-HSA-5617650;R-HSA-5617661;R-HSA-5617471;R-HSA-5617445;R-HSA-5617452;R-HSA-5617454;R-HSA-5617641;R-HSA-5617896;R-HSA-5617642
R-HSA-418346	Platelet homeostasis	1	118	0.0092709	0.583359	0.583359	1	29	0.00290145	9606	Homo sapiens	NOS2		R-HSA-418436
R-HSA-5696398	Nucleotide Excision Repair	1	119	0.00934947	0.586453	0.586453	16	36	0.0036018	9606	Homo sapiens	MT1A		R-HSA-6782211;R-HSA-6781824;R-HSA-6782208;R-HSA-6781867;R-HSA-6781833;R-HSA-6782069;R-HSA-6782004;R-HSA-6782131;R-HSA-6782227;R-HSA-6781840;R-HSA-6782224;R-HSA-6782141;R-HSA-6782204;R-HSA-6781818;R-HSA-6782138;R-HSA-6782234
R-HSA-2219528	PI3K/AKT Signaling in Cancer	1	120	0.00942803	0.589525	0.589525	1	21	0.00210105	9606	Homo sapiens	FGF18		R-HSA-2400009
R-HSA-170984	ARMS-mediated activation	2	272	0.0213702	0.599307	0.599307	6	44	0.0044022	9606	Homo sapiens	FGF18;NGF		R-HSA-169891;R-HSA-169904;R-HSA-169905;R-HSA-5672965;R-HSA-169895;R-HSA-169901
R-HSA-187706	Signalling to p38 via RIT and RIN	2	272	0.0213702	0.599307	0.599307	4	42	0.0042021	9606	Homo sapiens	FGF18;NGF		R-HSA-187698;R-HSA-187746;R-HSA-187697;R-HSA-5672965
R-HSA-504046	RNA Polymerase I, RNA Polymerase III, and Mitochondrial Transcription	1	124	0.0097423	0.601587	0.601587	26	42	0.0042021	9606	Homo sapiens	MT1A		R-HSA-73865;R-HSA-112149;R-HSA-112150;R-HSA-112153;R-HSA-76056;R-HSA-112152;R-HSA-83803;R-HSA-112155;R-HSA-73757;R-HSA-83805;R-HSA-76060;R-HSA-112156;R-HSA-73758;R-HSA-113442;R-HSA-113446;R-HSA-73769;R-HSA-113449;R-HSA-113705;R-HSA-113451;R-HSA-74986;R-HSA-113454;R-HSA-74993;R-HSA-74992;R-HSA-74994;R-HSA-112055;R-HSA-112054
R-HSA-170968	Frs2-mediated activation	2	274	0.0215273	0.603315	0.603315	6	45	0.00450225	9606	Homo sapiens	FGF18;NGF		R-HSA-170978;R-HSA-170979;R-HSA-170977;R-HSA-5672965;R-HSA-170964;R-HSA-170975
R-HSA-169893	Prolonged ERK activation events	2	276	0.0216845	0.607294	0.607294	11	50	0.0050025	9606	Homo sapiens	FGF18;NGF		R-HSA-170978;R-HSA-169891;R-HSA-170979;R-HSA-169904;R-HSA-169905;R-HSA-170977;R-HSA-5672965;R-HSA-169895;R-HSA-170964;R-HSA-170975;R-HSA-169901
R-HSA-2980736	Peptide hormone metabolism	1	126	0.00989943	0.607486	0.607486	2	53	0.00530265	9606	Homo sapiens	DPP4		R-HSA-400513;R-HSA-400495
R-HSA-535734	Fatty acid, triacylglycerol, and ketone body metabolism	3	424	0.0333124	0.609694	0.609694	2	151	0.0151076	9606	Homo sapiens	DGAT2;GPD1		R-HSA-75889;R-HSA-549192
R-HSA-167044	Signalling to RAS	2	278	0.0218416	0.611243	0.611243	4	49	0.00490245	9606	Homo sapiens	FGF18;NGF		R-HSA-167056;R-HSA-167217;R-HSA-5672965;R-HSA-167019
R-HSA-187687	Signalling to ERKs	2	287	0.0225487	0.628643	0.628643	17	63	0.00630315	9606	Homo sapiens	FGF18;NGF		R-HSA-187746;R-HSA-170978;R-HSA-169891;R-HSA-170979;R-HSA-170977;R-HSA-169895;R-HSA-167019;R-HSA-169901;R-HSA-187698;R-HSA-167056;R-HSA-169904;R-HSA-167217;R-HSA-169905;R-HSA-187697;R-HSA-5672965;R-HSA-170964;R-HSA-170975
R-HSA-449147	Signaling by Interleukins	3	436	0.0342552	0.628659	0.628659	7	218	0.0218109	9606	Homo sapiens	CNTFR;CSF3R;FGF18		R-HSA-6783556;R-HSA-5672965;R-HSA-8854738;R-HSA-5696490;R-HSA-5696491;R-HSA-6783530;R-HSA-6787737
R-HSA-114608	Platelet degranulation	1	137	0.0107637	0.638419	0.638419	2	11	0.00110055	9606	Homo sapiens	SELE		R-HSA-481044;R-HSA-481010
R-HSA-212165	Epigenetic regulation of gene expression	1	140	0.0109994	0.646428	0.646428	4	34	0.0034017	9606	Homo sapiens	MT1A		R-HSA-427366;R-HSA-5250930;R-HSA-5250947;R-HSA-5250938
R-HSA-909733	Interferon alpha/beta signaling	1	140	0.0109994	0.646428	0.646428	1	19	0.00190095	9606	Homo sapiens	IRF8		R-HSA-1015702
R-HSA-425407	SLC-mediated transmembrane transport	3	454	0.0356694	0.655923	0.655923	4	193	0.0193097	9606	Homo sapiens	SLCO1B3;SLC6A20		R-HSA-194083;R-HSA-352052;R-HSA-879575;R-HSA-194079
R-HSA-194840	Rho GTPase cycle	1	144	0.0113136	0.656835	0.656835	1	5	0.00050025	9606	Homo sapiens	ARHGAP4		R-HSA-194922
R-HSA-76005	Response to elevated platelet cytosolic Ca2+	1	144	0.0113136	0.656835	0.656835	2	14	0.0014007	9606	Homo sapiens	SELE		R-HSA-481044;R-HSA-481010
R-HSA-1500931	Cell-Cell communication	1	144	0.0113136	0.656835	0.656835	4	63	0.00630315	9606	Homo sapiens	CADM3		R-HSA-420582;R-HSA-420592;R-HSA-420586;R-HSA-420584
R-HSA-1474228	Degradation of the extracellular matrix	1	145	0.0113922	0.659389	0.659389	1	100	0.010005	9606	Homo sapiens	ADAMTS16		R-HSA-1592310
R-HSA-1257604	PIP3 activates AKT signaling	1	150	0.011785	0.671879	0.671879	1	33	0.00330165	9606	Homo sapiens	FGF18		R-HSA-2316434
R-HSA-1250342	PI3K events in ERBB4 signaling	1	150	0.011785	0.671879	0.671879	1	36	0.0036018	9606	Homo sapiens	FGF18		R-HSA-2316434
R-HSA-73857	RNA Polymerase II Transcription	1	151	0.0118636	0.674322	0.674322	36	48	0.0048024	9606	Homo sapiens	MT1A		R-HSA-113409;R-HSA-112385;R-HSA-113411;R-HSA-113413;R-HSA-113412;R-HSA-109639;R-HSA-113414;R-HSA-109638;R-HSA-112392;R-HSA-112395;R-HSA-75850;R-HSA-77069;R-HSA-77068;R-HSA-112396;R-HSA-77071;R-HSA-77073;R-HSA-75856;R-HSA-113429;R-HSA-75861;R-HSA-75095;R-HSA-75862;R-HSA-113430;R-HSA-75864;R-HSA-73946;R-HSA-75866;R-HSA-75869;R-HSA-75873;R-HSA-111264;R-HSA-76576;R-HSA-75949;R-HSA-75891;R-HSA-112379;…
R-HSA-5576891	Cardiac conduction	1	151	0.0118636	0.674322	0.674322	1	27	0.00270135	9606	Homo sapiens	KCNIP2		R-HSA-5577234
R-HSA-180292	GAB1 signalosome	1	153	0.0120207	0.679155	0.679155	1	46	0.0046023	9606	Homo sapiens	FGF18		R-HSA-2316434
R-HSA-162599	Late Phase of HIV Life Cycle	1	156	0.0122564	0.686271	0.686271	44	75	0.00750375	9606	Homo sapiens	MT1A		R-HSA-167111;R-HSA-167115;R-HSA-167113;R-HSA-167118;R-HSA-167181;R-HSA-167117;R-HSA-170706;R-HSA-170704;R-HSA-167121;R-HSA-167191;R-HSA-167130;R-HSA-167192;R-HSA-167128;R-HSA-167134;R-HSA-167196;R-HSA-167197;R-HSA-167133;R-HSA-167459;R-HSA-167072;R-HSA-167136;R-HSA-167076;R-HSA-167077;R-HSA-167147;R-HSA-167083;R-HSA-167150;R-HSA-167087;R-HSA-167148;R-HSA-167084;R-HSA-167468;R-HSA-167085;R-HSA-167…
R-HSA-425393	Transport of inorganic cations/anions and amino acids/oligopeptides	1	158	0.0124136	0.690927	0.690927	1	73	0.00730365	9606	Homo sapiens	SLC6A20		R-HSA-352052
R-HSA-6798695	Neutrophil degranulation	3	480	0.0377121	0.692768	0.692768	5	10	0.0010005	9606	Homo sapiens	FCN1;CHIT1;SELE		R-HSA-6798743;R-HSA-6800434;R-HSA-6798749;R-HSA-6798748;R-HSA-6798745
R-HSA-2404192	Signaling by Type 1 Insulin-like Growth Factor 1 Receptor (IGF1R)	2	325	0.0255343	0.695544	0.695544	3	84	0.0084042	9606	Homo sapiens	CILP;FGF18		R-HSA-109699;R-HSA-5672965;R-HSA-2404199
R-HSA-162587	HIV Life Cycle	1	168	0.0131992	0.713206	0.713206	44	112	0.0112056	9606	Homo sapiens	MT1A		R-HSA-167111;R-HSA-167115;R-HSA-167113;R-HSA-167118;R-HSA-167181;R-HSA-167117;R-HSA-170706;R-HSA-170704;R-HSA-167121;R-HSA-167191;R-HSA-167130;R-HSA-167192;R-HSA-167128;R-HSA-167134;R-HSA-167196;R-HSA-167197;R-HSA-167133;R-HSA-167459;R-HSA-167072;R-HSA-167136;R-HSA-167076;R-HSA-167077;R-HSA-167147;R-HSA-167083;R-HSA-167150;R-HSA-167087;R-HSA-167148;R-HSA-167084;R-HSA-167468;R-HSA-167085;R-HSA-167…
R-HSA-168273	Influenza Viral RNA Transcription and Replication	1	171	0.0134349	0.719574	0.719574	1	15	0.00150075	9606	Homo sapiens	MT1A		R-HSA-168326
R-HSA-2168880	Scavenging of heme from plasma	1	174	0.0136706	0.725802	0.725802	5	12	0.0012006	9606	Homo sapiens	HBA2;HBA1		R-HSA-2168883;R-HSA-2168885;R-HSA-2168884;R-HSA-2230938;R-HSA-2168889
R-HSA-877300	Interferon gamma signaling	1	176	0.0138278	0.729878	0.729878	1	15	0.00150075	9606	Homo sapiens	IRF8		R-HSA-1031716
R-HSA-72163	mRNA Splicing - Major Pathway	1	179	0.0140635	0.73588	0.73588	8	9	0.00090045	9606	Homo sapiens	MT1A		R-HSA-72160;R-HSA-72130;R-HSA-156661;R-HSA-72107;R-HSA-72139;R-HSA-72124;R-HSA-72143;R-HSA-72127
R-HSA-5621481	C-type lectin receptors (CLRs)	1	183	0.0143777	0.743677	0.743677	4	67	0.00670335	9606	Homo sapiens	CD209		R-HSA-5621573;R-HSA-5621606;R-HSA-5621571;R-HSA-5621615
R-HSA-168255	Influenza Life Cycle	1	183	0.0143777	0.743677	0.743677	1	52	0.0052026	9606	Homo sapiens	MT1A		R-HSA-168326
R-HSA-425366	Transport of glucose and other sugars, bile salts and organic acids, metal ions and amine compounds	1	189	0.0148492	0.754949	0.754949	1	75	0.00750375	9606	Homo sapiens	SLC6A20		R-HSA-352052
R-HSA-72172	mRNA Splicing	1	190	0.0149277	0.756779	0.756779	13	14	0.0014007	9606	Homo sapiens	MT1A		R-HSA-72160;R-HSA-72130;R-HSA-75079;R-HSA-75081;R-HSA-75080;R-HSA-72107;R-HSA-72139;R-HSA-75083;R-HSA-75082;R-HSA-72143;R-HSA-156661;R-HSA-72124;R-HSA-72127
R-HSA-1266738	Developmental Biology	7	1154	0.0906662	0.758904	0.758904	37	471	0.0471236	9606	Homo sapiens	WNT10B;FABP4;MT1A;FGF18;PLIN1		R-HSA-5617877;R-HSA-5617492;R-HSA-5617431;R-HSA-5621010;R-HSA-5617874;R-HSA-5617887;R-HSA-480520;R-HSA-5617862;R-HSA-5672965;R-HSA-5617859;R-HSA-452894;R-HSA-5617484;R-HSA-5617676;R-HSA-5693644;R-HSA-5617486;R-HSA-5617672;R-HSA-5617483;R-HSA-5617867;R-HSA-5621002;R-HSA-5617866;R-HSA-452838;R-HSA-5617462;R-HSA-560491;R-HSA-560493;R-HSA-5617650;R-HSA-5617661;R-HSA-5617471;R-HSA-480301;R-HSA-452392;…
R-HSA-168254	Influenza Infection	1	195	0.0153206	0.765729	0.765729	1	60	0.006003	9606	Homo sapiens	MT1A		R-HSA-168326
R-HSA-198933	Immunoregulatory interactions between a Lymphoid and a non-Lymphoid cell	2	377	0.0296197	0.770824	0.770824	2	41	0.00410205	9606	Homo sapiens	SELE;LILRB5		R-HSA-199043;R-HSA-199046
R-HSA-597592	Post-translational protein modification	6	1028	0.0807668	0.780008	0.780008	4	368	0.0368184	9606	Homo sapiens	ADAMTS16;ADAMTSL1;WBSCR17;GALNTL1;NLRP3		R-HSA-5173005;R-HSA-5173192;R-HSA-913675;R-HSA-5691439
R-HSA-397014	Muscle contraction	1	214	0.0168133	0.796866	0.796866	1	40	0.004002	9606	Homo sapiens	KCNIP2		R-HSA-5577234
R-HSA-196849	Metabolism of water-soluble vitamins and cofactors	1	214	0.0168133	0.796866	0.796866	1	120	0.012006	9606	Homo sapiens	SLC19A3		R-HSA-199626
R-HSA-1168372	Downstream signaling events of B Cell Receptor (BCR)	1	226	0.0177561	0.814383	0.814383	1	45	0.00450225	9606	Homo sapiens	FGF18		R-HSA-2316434
R-HSA-187037	NGF signalling via TRKA from the plasma membrane	2	426	0.0334695	0.826552	0.826552	31	143	0.0143072	9606	Homo sapiens	FGF18;NGF		R-HSA-198211;R-HSA-177479;R-HSA-167684;R-HSA-166538;R-HSA-166542;R-HSA-198732;R-HSA-177491;R-HSA-166544;R-HSA-167056;R-HSA-5672965;R-HSA-198295;R-HSA-170964;R-HSA-170975;R-HSA-177501;R-HSA-187746;R-HSA-170978;R-HSA-169891;R-HSA-170979;R-HSA-170977;R-HSA-169895;R-HSA-198315;R-HSA-167019;R-HSA-169901;R-HSA-187698;R-HSA-2316434;R-HSA-169904;R-HSA-190065;R-HSA-167217;R-HSA-169905;R-HSA-187697;R-HSA-1…
R-HSA-168256	Immune System	15	2461	0.193353	0.831081	0.831081	36	1208	0.12086	9606	Homo sapiens	FCN1;CNTFR;CSF3R;NOS2;SELE;LILRB5;CHIT1;MT1A;CD209;FGF18;TNFRSF8;IRF8;NLRP3		R-HSA-199043;R-HSA-418436;R-HSA-166726;R-HSA-199046;R-HSA-844612;R-HSA-166792;R-HSA-6783530;R-HSA-844610;R-HSA-5621573;R-HSA-873951;R-HSA-5672965;R-HSA-844440;R-HSA-6800434;R-HSA-8854738;R-HSA-5621571;R-HSA-1015702;R-HSA-1964482;R-HSA-6783556;R-HSA-166753;R-HSA-2855054;R-HSA-1031716;R-HSA-1306876;R-HSA-6798743;R-HSA-2316434;R-HSA-5621606;R-HSA-1250272;R-HSA-1296421;R-HSA-6798749;R-HSA-8856189;R-H…
R-HSA-416476	G alpha (q) signalling events	1	240	0.0188561	0.832939	0.832939	3	20	0.002001	9606	Homo sapiens	BDKRB1		R-HSA-749448;R-HSA-749452;R-HSA-379048
R-HSA-194315	Signaling by Rho GTPases	2	438	0.0344123	0.838224	0.838224	2	108	0.0108054	9606	Homo sapiens	KLK1;ARHGAP4		R-HSA-194922;R-HSA-5625883
R-HSA-71387	Metabolism of carbohydrates	2	442	0.0347266	0.841956	0.841956	3	234	0.0234117	9606	Homo sapiens	CHIT1;AMY2A		R-HSA-188979;R-HSA-191114;R-HSA-6786652
R-HSA-72203	Processing of Capped Intron-Containing Pre-mRNA	1	248	0.0194846	0.842705	0.842705	15	32	0.0032016	9606	Homo sapiens	MT1A		R-HSA-72160;R-HSA-72130;R-HSA-72103;R-HSA-75079;R-HSA-75081;R-HSA-75080;R-HSA-72107;R-HSA-72139;R-HSA-75083;R-HSA-75082;R-HSA-72143;R-HSA-156661;R-HSA-72124;R-HSA-72095;R-HSA-72127
R-HSA-162906	HIV Infection	1	253	0.0198774	0.84852	0.84852	44	155	0.0155078	9606	Homo sapiens	MT1A		R-HSA-167111;R-HSA-167115;R-HSA-167113;R-HSA-167118;R-HSA-167181;R-HSA-167117;R-HSA-170706;R-HSA-170704;R-HSA-167121;R-HSA-167191;R-HSA-167130;R-HSA-167192;R-HSA-167128;R-HSA-167134;R-HSA-167196;R-HSA-167197;R-HSA-167133;R-HSA-167459;R-HSA-167072;R-HSA-167136;R-HSA-167076;R-HSA-167077;R-HSA-167147;R-HSA-167083;R-HSA-167150;R-HSA-167087;R-HSA-167148;R-HSA-167084;R-HSA-167468;R-HSA-167085;R-HSA-167…
R-HSA-5663202	Diseases of signal transduction	2	464	0.0364551	0.861136	0.861136	28	297	0.0297149	9606	Homo sapiens	MT1A;FGF18		R-HSA-5655315;R-HSA-5655262;R-HSA-5654748;R-HSA-5655323;R-HSA-5655320;R-HSA-2033486;R-HSA-5655301;R-HSA-5655233;R-HSA-5655247;R-HSA-5655244;R-HSA-5655245;R-HSA-5655243;R-HSA-5655241;R-HSA-2033472;R-HSA-5655285;R-HSA-5655295;R-HSA-2400009;R-HSA-5655289;R-HSA-2077424;R-HSA-5655270;R-HSA-5655268;R-HSA-2077420;R-HSA-2012074;R-HSA-2012073;R-HSA-8851710;R-HSA-5655343;R-HSA-5655277;R-HSA-5655339
R-HSA-5673001	RAF/MAP kinase cascade	1	267	0.0209774	0.863694	0.863694	1	39	0.00390195	9606	Homo sapiens	FGF18		R-HSA-5672965
R-HSA-112412	SOS-mediated signalling	1	267	0.0209774	0.863694	0.863694	1	41	0.00410205	9606	Homo sapiens	FGF18		R-HSA-5672965
R-HSA-179812	GRB2 events in EGFR signaling	1	267	0.0209774	0.863694	0.863694	1	42	0.0042021	9606	Homo sapiens	FGF18		R-HSA-5672965
R-HSA-180336	SHC1 events in EGFR signaling	1	267	0.0209774	0.863694	0.863694	1	43	0.00430215	9606	Homo sapiens	FGF18		R-HSA-5672965
R-HSA-1250347	SHC1 events in ERBB4 signaling	1	267	0.0209774	0.863694	0.863694	1	43	0.00430215	9606	Homo sapiens	FGF18		R-HSA-5672965
R-HSA-372790	Signaling by GPCR	8	1478	0.116122	0.867023	0.867023	15	319	0.031916	9606	Homo sapiens	WNT10B;DARC;SUCNR1;CCL21;CCL4;PENK;FGF18;BDKRB1		R-HSA-373061;R-HSA-749448;R-HSA-749454;R-HSA-3296244;R-HSA-749452;R-HSA-373071;R-HSA-380073;R-HSA-443978;R-HSA-379048;R-HSA-374251;R-HSA-201708;R-HSA-5672965;R-HSA-749456;R-HSA-374331;R-HSA-374298
R-HSA-211945	Phase 1 - Functionalization of compounds	1	272	0.0213702	0.86874	0.86874	1	90	0.0090045	9606	Homo sapiens	CMBL		R-HSA-6786190
R-HSA-5684996	MAPK1/MAPK3 signaling	1	274	0.0215273	0.870706	0.870706	1	46	0.0046023	9606	Homo sapiens	FGF18		R-HSA-5672965
R-HSA-2586552	Signaling by Leptin	1	275	0.0216059	0.871679	0.871679	1	58	0.0058029	9606	Homo sapiens	FGF18		R-HSA-5672965
R-HSA-912526	Interleukin receptor SHC signaling	1	277	0.021763	0.873601	0.873601	1	45	0.00450225	9606	Homo sapiens	FGF18		R-HSA-5672965
R-HSA-1430728	Metabolism	21	3452	0.271213	0.878173	0.878173	38	2106	0.210705	9606	Homo sapiens	PNLIPRP1;DGAT2;AMY2A;PLA2G1B;HBA2;CMBL;HBA1;CIDEC;CHIT1;LIPE;FABP4;MT1A;SLCO1B3;GPD1;SLC19A3;MT1G;PLIN1		R-HSA-549192;R-HSA-1602398;R-HSA-191114;R-HSA-163402;R-HSA-6784622;R-HSA-199626;R-HSA-5662618;R-HSA-5662617;R-HSA-163602;R-HSA-1602377;R-HSA-163539;R-HSA-1602446;R-HSA-1602368;R-HSA-163418;R-HSA-192475;R-HSA-163416;R-HSA-5334794;R-HSA-163551;R-HSA-194079;R-HSA-1602374;R-HSA-1237325;R-HSA-163549;R-HSA-1482889;R-HSA-163554;R-HSA-194083;R-HSA-163489;R-HSA-1247668;R-HSA-1602417;R-HSA-6786190;R-HSA-16…
R-HSA-451927	Interleukin-2 signaling	1	284	0.022313	0.88011	0.88011	1	64	0.0064032	9606	Homo sapiens	FGF18		R-HSA-5672965
R-HSA-5218921	VEGFR2 mediated cell proliferation	1	285	0.0223916	0.881012	0.881012	1	51	0.00510255	9606	Homo sapiens	FGF18		R-HSA-5672965
R-HSA-5688426	Deubiquitination	1	286	0.0224701	0.881907	0.881907	1	76	0.0076038	9606	Homo sapiens	NLRP3		R-HSA-5691439
R-HSA-913531	Interferon Signaling	1	291	0.022863	0.886286	0.886286	2	50	0.0050025	9606	Homo sapiens	IRF8		R-HSA-1015702;R-HSA-1031716
R-HSA-8853659	RET signaling	1	292	0.0229415	0.887142	0.887142	1	63	0.00630315	9606	Homo sapiens	FGF18		R-HSA-5672965
R-HSA-512988	Interleukin-3, 5 and GM-CSF signaling	1	293	0.0230201	0.887992	0.887992	1	77	0.00770385	9606	Homo sapiens	FGF18		R-HSA-5672965
R-HSA-881907	Gastrin-CREB signalling pathway via PKC and MAPK	2	504	0.0395977	0.890697	0.890697	4	68	0.0068034	9606	Homo sapiens	FGF18;BDKRB1		R-HSA-5672965;R-HSA-749448;R-HSA-749452;R-HSA-379048
R-HSA-168249	Innate Immune System	8	1534	0.120522	0.892228	0.892228	24	686	0.0686343	9606	Homo sapiens	FCN1;CHIT1;MT1A;CD209;FGF18;NLRP3;SELE		R-HSA-166753;R-HSA-166726;R-HSA-2855054;R-HSA-844612;R-HSA-166792;R-HSA-844610;R-HSA-1306876;R-HSA-6798743;R-HSA-5621573;R-HSA-2316434;R-HSA-873951;R-HSA-5672965;R-HSA-5621606;R-HSA-1250272;R-HSA-844440;R-HSA-6800434;R-HSA-5621571;R-HSA-1296421;R-HSA-6798749;R-HSA-5621615;R-HSA-6798748;R-HSA-6798745;R-HSA-2855125;R-HSA-1964482
R-HSA-392499	Metabolism of proteins	9	1697	0.133328	0.893974	0.893974	7	648	0.0648324	9606	Homo sapiens	ADAMTS16;ADAMTSL1;DPP4;WBSCR17;KLK1;GALNTL1;NLRP3		R-HSA-5173005;R-HSA-5173192;R-HSA-913675;R-HSA-400513;R-HSA-5691439;R-HSA-400495;R-HSA-381466
R-HSA-196854	Metabolism of vitamins and cofactors	1	301	0.0236486	0.894567	0.894567	1	163	0.0163082	9606	Homo sapiens	SLC19A3		R-HSA-199626
R-HSA-375165	NCAM signaling for neurite out-growth	1	304	0.0238843	0.896933	0.896933	1	62	0.0062031	9606	Homo sapiens	FGF18		R-HSA-5672965
R-HSA-76002	Platelet activation, signaling and aggregation	1	305	0.0239629	0.89771	0.89771	2	114	0.0114057	9606	Homo sapiens	SELE		R-HSA-481044;R-HSA-481010
R-HSA-195258	RHO GTPase Effectors	1	307	0.0241201	0.899246	0.899246	1	103	0.0103052	9606	Homo sapiens	KLK1		R-HSA-5625883
R-HSA-382551	Transmembrane transport of small molecules	4	888	0.0697674	0.900481	0.900481	9	320	0.032016	9606	Homo sapiens	SLCO1B3;AQP7;SLC6A20		R-HSA-194083;R-HSA-352052;R-HSA-507871;R-HSA-507870;R-HSA-879575;R-HSA-507869;R-HSA-507868;R-HSA-432074;R-HSA-194079
R-HSA-166520	Signalling by NGF	2	520	0.0408548	0.900816	0.900816	62	197	0.0197099	9606	Homo sapiens	FGF18;NGF		R-HSA-193665;R-HSA-167047;R-HSA-167684;R-HSA-193669;R-HSA-166538;R-HSA-193672;R-HSA-166542;R-HSA-187020;R-HSA-193677;R-HSA-166544;R-HSA-167056;R-HSA-193686;R-HSA-198295;R-HSA-193684;R-HSA-204949;R-HSA-187035;R-HSA-193694;R-HSA-209566;R-HSA-193695;R-HSA-204958;R-HSA-169891;R-HSA-169895;R-HSA-193703;R-HSA-187045;R-HSA-198315;R-HSA-193705;R-HSA-169901;R-HSA-187698;R-HSA-2316434;R-HSA-169904;R-HSA-16…
R-HSA-2730905	Role of LAT2/NTAL/LAB on calcium mobilization	1	314	0.02467	0.904446	0.904446	1	40	0.004002	9606	Homo sapiens	FGF18		R-HSA-2316434
R-HSA-112399	IRS-mediated signalling	1	319	0.0250629	0.907997	0.907997	2	74	0.0074037	9606	Homo sapiens	FGF18		R-HSA-109699;R-HSA-5672965
R-HSA-74751	Insulin receptor signalling cascade	1	322	0.0252986	0.910064	0.910064	2	90	0.0090045	9606	Homo sapiens	FGF18		R-HSA-109699;R-HSA-5672965
R-HSA-2428928	IRS-related events triggered by IGF1R	1	323	0.0253771	0.910743	0.910743	2	77	0.00770385	9606	Homo sapiens	FGF18		R-HSA-109699;R-HSA-5672965
R-HSA-2428924	IGF1R signaling cascade	1	324	0.0254557	0.911417	0.911417	2	82	0.0082041	9606	Homo sapiens	FGF18		R-HSA-109699;R-HSA-5672965
R-HSA-5683057	MAPK family signaling cascades	1	324	0.0254557	0.911417	0.911417	1	86	0.0086043	9606	Homo sapiens	FGF18		R-HSA-5672965
R-HSA-73894	DNA Repair	1	346	0.0271842	0.925031	0.925031	16	305	0.0305153	9606	Homo sapiens	MT1A		R-HSA-6782211;R-HSA-6781824;R-HSA-6782208;R-HSA-6781867;R-HSA-6781833;R-HSA-6782069;R-HSA-6782004;R-HSA-6782131;R-HSA-6782227;R-HSA-6781840;R-HSA-6782224;R-HSA-6782141;R-HSA-6782204;R-HSA-6781818;R-HSA-6782138;R-HSA-6782234
R-HSA-74752	Signaling by Insulin receptor	1	347	0.0272627	0.925598	0.925598	2	99	0.00990495	9606	Homo sapiens	FGF18		R-HSA-109699;R-HSA-5672965
R-HSA-388396	GPCR downstream signaling	5	1124	0.0883092	0.925785	0.925785	6	64	0.0064032	9606	Homo sapiens	SUCNR1;CCL21;CCL4;PENK;BDKRB1		R-HSA-749448;R-HSA-749454;R-HSA-749452;R-HSA-749456;R-HSA-380073;R-HSA-379048
R-HSA-1433557	Signaling by SCF-KIT	1	367	0.0288341	0.936088	0.936088	2	108	0.0108054	9606	Homo sapiens	FGF18		R-HSA-2316434;R-HSA-5672965
R-HSA-4420097	VEGFA-VEGFR2 Pathway	1	372	0.0292269	0.938473	0.938473	1	115	0.0115058	9606	Homo sapiens	FGF18		R-HSA-5672965
R-HSA-1236394	Signaling by ERBB4	1	373	0.0293055	0.938939	0.938939	2	117	0.0117059	9606	Homo sapiens	FGF18		R-HSA-2316434;R-HSA-5672965
R-HSA-194138	Signaling by VEGF	1	381	0.029934	0.942546	0.942546	1	121	0.0121061	9606	Homo sapiens	FGF18		R-HSA-5672965
R-HSA-186763	Downstream signal transduction	1	389	0.0305625	0.945942	0.945942	2	105	0.0105053	9606	Homo sapiens	FGF18		R-HSA-2316434;R-HSA-5672965
R-HSA-983705	Signaling by the B Cell Receptor (BCR)	1	390	0.0306411	0.946352	0.946352	1	66	0.0066033	9606	Homo sapiens	FGF18		R-HSA-2316434
R-HSA-2424491	DAP12 signaling	1	392	0.0307982	0.947163	0.947163	2	106	0.0106053	9606	Homo sapiens	FGF18		R-HSA-2316434;R-HSA-5672965
R-HSA-177929	Signaling by EGFR	1	402	0.0315839	0.951042	0.951042	2	139	0.013907	9606	Homo sapiens	FGF18		R-HSA-2316434;R-HSA-5672965
R-HSA-2172127	DAP12 interactions	1	409	0.0321339	0.953587	0.953587	2	122	0.0122061	9606	Homo sapiens	FGF18		R-HSA-2316434;R-HSA-5672965
R-HSA-186797	Signaling by PDGF	1	420	0.0329981	0.957326	0.957326	2	117	0.0117059	9606	Homo sapiens	FGF18		R-HSA-2316434;R-HSA-5672965
R-HSA-162582	Signal Transduction	15	2884	0.226587	0.957746	0.957746	173	1836	0.183692	9606	Homo sapiens	WNT10B;SUCNR1;CCL21;KLK1;NGF;ARHGAP4;DARC;MT1A;SOX17;CILP;CCL4;PENK;FGF18;BDKRB1;RSPO3		R-HSA-5654614;R-HSA-5654615;R-HSA-5654612;R-HSA-167684;R-HSA-5654608;R-HSA-5654622;R-HSA-5654623;R-HSA-5654620;R-HSA-5654618;R-HSA-3781941;R-HSA-3781943;R-HSA-3238691;R-HSA-3238694;R-HSA-6803838;R-HSA-5654607;R-HSA-6803836;R-HSA-5654605;R-HSA-5654603;R-HSA-5665608;R-HSA-374298;R-HSA-6803527;R-HSA-5654646;R-HSA-5654647;R-HSA-6803523;R-HSA-5654640;R-HSA-5654655;R-HSA-5654399;R-HSA-5654653;R-HSA-565…
R-HSA-2871796	FCERI mediated MAPK activation	1	445	0.0349623	0.96475	0.96475	1	59	0.00590295	9606	Homo sapiens	FGF18		R-HSA-5672965
R-HSA-1643685	Disease	6	1472	0.115651	0.967531	0.967531	76	882	0.0882441	9606	Homo sapiens	ADAMTS16;ADAMTSL1;MT1A;SLCO1B3;FGF18;SLC6A20		R-HSA-168326;R-HSA-5655262;R-HSA-5654748;R-HSA-167181;R-HSA-167191;R-HSA-5655233;R-HSA-5655247;R-HSA-167192;R-HSA-5655244;R-HSA-5655245;R-HSA-5655243;R-HSA-167196;R-HSA-167197;R-HSA-5655241;R-HSA-167459;R-HSA-167072;R-HSA-5655285;R-HSA-167076;R-HSA-167077;R-HSA-167083;R-HSA-5655295;R-HSA-167087;R-HSA-2400009;R-HSA-167084;R-HSA-167468;R-HSA-167085;R-HSA-5655289;R-HSA-167090;R-HSA-167474;R-HSA-5655…
R-HSA-3700989	Transcriptional Regulation by TP53	1	484	0.0380264	0.973858	0.973858	3	256	0.0256128	9606	Homo sapiens	MT1A		R-HSA-6797606;R-HSA-6797712;R-HSA-6797616
R-HSA-5663205	Infectious disease	1	508	0.039912	0.978261	0.978261	45	311	0.0311156	9606	Homo sapiens	MT1A		R-HSA-168326;R-HSA-167111;R-HSA-167115;R-HSA-167113;R-HSA-167118;R-HSA-167181;R-HSA-167117;R-HSA-170706;R-HSA-170704;R-HSA-167121;R-HSA-167191;R-HSA-167130;R-HSA-167192;R-HSA-167128;R-HSA-167134;R-HSA-167196;R-HSA-167197;R-HSA-167133;R-HSA-167459;R-HSA-167072;R-HSA-167136;R-HSA-167076;R-HSA-167077;R-HSA-167147;R-HSA-167083;R-HSA-167150;R-HSA-167087;R-HSA-167148;R-HSA-167084;R-HSA-167468;R-HSA-167…
R-HSA-211859	Biological oxidations	1	523	0.0410905	0.980631	0.980631	1	175	0.0175088	9606	Homo sapiens	CMBL		R-HSA-6786190
R-HSA-2454202	Fc epsilon receptor (FCERI) signaling	1	564	0.0443118	0.985884	0.985884	2	135	0.0135068	9606	Homo sapiens	FGF18		R-HSA-2316434;R-HSA-5672965
R-HSA-5653656	Vesicle-mediated transport	2	859	0.067489	0.989042	0.989042	7	236	0.0236118	9606	Homo sapiens	SCARA5;HBA2;HBA1		R-HSA-2168883;R-HSA-2187266;R-HSA-2168885;R-HSA-2168884;R-HSA-2230938;R-HSA-2168889;R-HSA-2299677
R-HSA-422475	Axon guidance	1	598	0.046983	0.989149	0.989149	1	286	0.0286143	9606	Homo sapiens	FGF18		R-HSA-5672965
R-HSA-1280218	Adaptive Immune System	3	1148	0.0901948	0.992626	0.992626	3	262	0.0262131	9606	Homo sapiens	FGF18;SELE;LILRB5		R-HSA-199043;R-HSA-2316434;R-HSA-199046
R-HSA-212436	Generic Transcription Pathway	1	1042	0.0818668	0.999674	0.999674	3	352	0.0352176	9606	Homo sapiens	MT1A		R-HSA-6797606;R-HSA-6797712;R-HSA-6797616
R-HSA-74160	Gene Expression	1	2118	0.166405	1	1	102	781	0.0781391	9606	Homo sapiens	MT1A		R-HSA-113409;R-HSA-112385;R-HSA-113411;R-HSA-113413;R-HSA-113412;R-HSA-113414;R-HSA-112392;R-HSA-112395;R-HSA-77069;R-HSA-77068;R-HSA-112396;R-HSA-77071;R-HSA-77073;R-HSA-113429;R-HSA-77077;R-HSA-112149;R-HSA-113430;R-HSA-77078;R-HSA-112150;R-HSA-77081;R-HSA-112153;R-HSA-76056;R-HSA-112152;R-HSA-6810238;R-HSA-77083;R-HSA-112155;R-HSA-77085;R-HSA-73757;R-HSA-6810235;R-HSA-76060;R-HSA-112156;R-HSA-…

## Sheet: REACTOME_down
Pathway identifier	Pathway name	#Entities found	#Entities total	Entities ratio	Entities pValue	Entities FDR	#Reactions found	#Reactions total	Reactions ratio	Species identifier	Species name	Submitted entities found	Mapped entities	Found reaction identifiers
R-HSA-6805567	Keratinization	30	218	0.0171276	1.11022e-16	2.04281e-14	15	32	0.0032016	9606	Homo sapiens	SPRR3;KRT81;KRT16;KRT14;PKP1;KRT5;DSG3;KRT20;KRT6B;SPRR1B		R-HSA-6814695;R-HSA-6805573;R-HSA-6806629;R-HSA-6814734;R-HSA-6814764;R-HSA-6805546;R-HSA-6810357;R-HSA-6806613;R-HSA-6811539;R-HSA-6814387;R-HSA-6806610;R-HSA-6809393;R-HSA-6809663;R-HSA-6814298;R-HSA-6810937
R-HSA-6809371	Formation of the cornified envelope	30	130	0.0102137	1.11022e-16	2.04281e-14	8	25	0.00250125	9606	Homo sapiens	SPRR3;KRT81;KRT16;KRT14;PKP1;KRT5;DSG3;KRT20;KRT6B;SPRR1B		R-HSA-6814695;R-HSA-6810357;R-HSA-6811539;R-HSA-6814387;R-HSA-6814734;R-HSA-6814764;R-HSA-6814298;R-HSA-6810937
R-HSA-1266738	Developmental Biology	37	1154	0.0906662	1.12665e-12	1.37452e-10	53	471	0.0471236	9606	Homo sapiens	SPRR3;KRT81;FGG;KRT5;KRT20;HIST2H2BE;ABLIM2;KRT16;FGF19;KRT14;COL4A5;PKP1;DSG3;KRT6B;SPRR1B		R-HSA-5617877;R-HSA-6814695;R-HSA-5617492;R-HSA-6806629;R-HSA-5617874;R-HSA-5617887;R-HSA-6810357;R-HSA-5617862;R-HSA-5617859;R-HSA-5617484;R-HSA-5693644;R-HSA-5617486;R-HSA-5617483;R-HSA-5617867;R-HSA-5617866;R-HSA-6805573;R-HSA-5617650;R-HSA-5617661;R-HSA-6806613;R-HSA-6806610;R-HSA-418865;R-HSA-5617641;R-HSA-5617896;R-HSA-6814298;R-HSA-5617642;R-HSA-5617431;R-HSA-5672980;R-HSA-5672978;R-HSA-56…
R-HSA-1442490	Collagen degradation	7	69	0.00542112	2.8559e-06	0.000262743	16	34	0.0034017	9606	Homo sapiens	MMP13;COL4A5;MMP10;CTSL2		R-HSA-2471621;R-HSA-1564117;R-HSA-1474197;R-HSA-1564179;R-HSA-1564184;R-HSA-1564120;R-HSA-2168046;R-HSA-1454822;R-HSA-2485111;R-HSA-1454757;R-HSA-1564164;R-HSA-1474213;R-HSA-2484882;R-HSA-1564142;R-HSA-2168923;R-HSA-2537499
R-HSA-2559580	Oxidative Stress Induced Senescence	8	111	0.00872093	6.65522e-06	0.000485831	12	38	0.0038019	9606	Homo sapiens	CDKN2A;HIST2H2BE		R-HSA-3222593;R-HSA-3229089;R-HSA-182594;R-HSA-3223200;R-HSA-6804998;R-HSA-3229138;R-HSA-6804996;R-HSA-3240295;R-HSA-3209111;R-HSA-3209114;R-HSA-3229102;R-HSA-3209151
R-HSA-1592389	Activation of Matrix Metalloproteinases	5	35	0.00274984	1.58149e-05	0.000846213	14	27	0.00270135	9606	Homo sapiens	MMP13;MMP10;CTSL2		R-HSA-1602488;R-HSA-1602458;R-HSA-1604731;R-HSA-1604763;R-HSA-1604732;R-HSA-1604752;R-HSA-1604690;R-HSA-1592371;R-HSA-1592436;R-HSA-1604712;R-HSA-1592297;R-HSA-1592362;R-HSA-1604741;R-HSA-1604359
R-HSA-2022090	Assembly of collagen fibrils and other multimeric structures	6	60	0.00471402	1.62733e-05	0.000846213	3	25	0.00250125	9606	Homo sapiens	MMP13;COL4A5;MMP10;CTSL2		R-HSA-2213200;R-HSA-2213207;R-HSA-2396234
R-HSA-1474244	Extracellular matrix organization	12	320	0.0251414	2.50502e-05	0.00115231	81	275	0.0275138	9606	Homo sapiens	MMP13;FGG;TNC;COL4A5;LEPREL1;HAPLN1;MMP10;CTSL2		R-HSA-114560;R-HSA-2002460;R-HSA-1602458;R-HSA-216064;R-HSA-4086205;R-HSA-1474197;R-HSA-1604763;R-HSA-1564179;R-HSA-3791295;R-HSA-216069;R-HSA-216068;R-HSA-1604752;R-HSA-1564184;R-HSA-216082;R-HSA-2424246;R-HSA-1566981;R-HSA-1564164;R-HSA-3791149;R-HSA-1566979;R-HSA-2327733;R-HSA-2327738;R-HSA-1604741;R-HSA-2533944;R-HSA-3814820;R-HSA-1604359;R-HSA-1602488;R-HSA-2022073;R-HSA-4084501;R-HSA-145478…
R-HSA-2559585	Oncogene Induced Senescence	5	41	0.00322124	3.34699e-05	0.00125397	10	17	0.00170085	9606	Homo sapiens	CDKN2A		R-HSA-182594;R-HSA-6804998;R-HSA-6804996;R-HSA-3209109;R-HSA-3209111;R-HSA-3200023;R-HSA-3209096;R-HSA-3209114;R-HSA-3209098;R-HSA-3209151
R-HSA-1474290	Collagen formation	7	102	0.00801383	3.48325e-05	0.00125397	13	40	0.004002	9606	Homo sapiens	MMP13;COL4A5;LEPREL1;MMP10;CTSL2		R-HSA-1650808;R-HSA-2002460;R-HSA-2022073;R-HSA-2089971;R-HSA-2396234;R-HSA-1981104;R-HSA-2213200;R-HSA-2213207;R-HSA-1981128;R-HSA-1980233;R-HSA-1981157;R-HSA-1981120;R-HSA-2002401
R-HSA-1474228	Degradation of the extracellular matrix	8	145	0.0113922	4.42271e-05	0.00145949	48	100	0.010005	9606	Homo sapiens	MMP13;COL4A5;MMP10;CTSL2		R-HSA-1602458;R-HSA-1564117;R-HSA-4086205;R-HSA-1474197;R-HSA-1604763;R-HSA-1564179;R-HSA-3791295;R-HSA-1604752;R-HSA-1604690;R-HSA-2534248;R-HSA-1564184;R-HSA-1564120;R-HSA-2168046;R-HSA-1454791;R-HSA-2485111;R-HSA-1566981;R-HSA-1564164;R-HSA-3791149;R-HSA-1566979;R-HSA-1592270;R-HSA-1604741;R-HSA-2533944;R-HSA-3814820;R-HSA-1604359;R-HSA-2471621;R-HSA-1602488;R-HSA-1592314;R-HSA-1604731;R-HSA-1…
R-HSA-204174	Regulation of pyruvate dehydrogenase (PDH) complex	4	24	0.00188561	6.44532e-05	0.0019336	1	2	0.0002001	9606	Homo sapiens	PKP1		R-HSA-203946
R-HSA-2559583	Cellular Senescence	8	196	0.0153991	0.000342232	0.00958248	23	87	0.00870435	9606	Homo sapiens	CDKN2A;HIST2H2BE		R-HSA-3790137;R-HSA-182594;R-HSA-6804998;R-HSA-3857305;R-HSA-3229138;R-HSA-6804996;R-HSA-3209109;R-HSA-3857308;R-HSA-3209111;R-HSA-3200023;R-HSA-3209114;R-HSA-3790130;R-HSA-3209151;R-HSA-3788745;R-HSA-3222593;R-HSA-3229089;R-HSA-3223200;R-HSA-3788748;R-HSA-3785711;R-HSA-3240295;R-HSA-3209096;R-HSA-3209098;R-HSA-3229102
R-HSA-70268	Pyruvate metabolism	4	46	0.00361408	0.000751064	0.0195277	1	11	0.00110055	9606	Homo sapiens	PKP1		R-HSA-203946
R-HSA-171306	Packaging Of Telomere Ends	3	34	0.00267128	0.00341011	0.0721259	2	2	0.0002001	9606	Homo sapiens	HIST2H2BE		R-HSA-181450;R-HSA-176700
R-HSA-73728	RNA Polymerase I Promoter Opening	3	34	0.00267128	0.00341011	0.0721259	1	2	0.0002001	9606	Homo sapiens	HIST2H2BE		R-HSA-73718
R-HSA-5362517	Signaling by Retinoic Acid	4	70	0.00549969	0.00343457	0.0721259	1	21	0.00210105	9606	Homo sapiens	PKP1		R-HSA-203946
R-HSA-351906	Apoptotic cleavage of cell adhesion proteins	2	11	0.000864236	0.00428327	0.0776296	2	10	0.0010005	9606	Homo sapiens	PKP1;DSG3		R-HSA-201595;R-HSA-201631
R-HSA-446107	Type I hemidesmosome assembly	2	11	0.000864236	0.00428327	0.0776296	1	6	0.0006003	9606	Homo sapiens	KRT14;KRT5		R-HSA-446077
R-HSA-5334118	DNA methylation	3	37	0.00290698	0.00431276	0.0776296	7	7	0.00070035	9606	Homo sapiens	HIST2H2BE		R-HSA-5334097;R-HSA-5334160;R-HSA-5334099;R-HSA-5334179;R-HSA-5334164;R-HSA-5334151;R-HSA-5334152
R-HSA-190861	Gap junction assembly	3	39	0.00306411	0.00498764	0.0847899	4	16	0.0016008	9606	Homo sapiens	GJB6;GJB5		R-HSA-451056;R-HSA-190682;R-HSA-190698;R-HSA-190687
R-HSA-977225	Amyloid fiber formation	4	82	0.00644249	0.00597461	0.0955937	6	28	0.0028014	9606	Homo sapiens	APCS;CALB1;HIST2H2BE;LTF		R-HSA-976734;R-HSA-977224;R-HSA-976723;R-HSA-977136;R-HSA-976817;R-HSA-8932599
R-HSA-71406	Pyruvate metabolism and Citric Acid (TCA) cycle	4	87	0.00683532	0.00732518	0.109664	1	29	0.00290145	9606	Homo sapiens	PKP1		R-HSA-203946
R-HSA-212300	PRC2 methylates histones and DNA	3	45	0.00353551	0.00737935	0.109664	4	4	0.0004002	9606	Homo sapiens	HIST2H2BE		R-HSA-212263;R-HSA-212222;R-HSA-212269;R-HSA-212252
R-HSA-427359	SIRT1 negatively regulates rRNA Expression	3	46	0.00361408	0.00783318	0.109664	3	5	0.00050025	9606	Homo sapiens	HIST2H2BE		R-HSA-427527;R-HSA-427514;R-HSA-427528
R-HSA-2559582	Senescence-Associated Secretory Phenotype (SASP)	4	89	0.00699246	0.00791739	0.110843	7	22	0.0022011	9606	Homo sapiens	CDKN2A;HIST2H2BE		R-HSA-3788745;R-HSA-3790137;R-HSA-182594;R-HSA-3857305;R-HSA-3788748;R-HSA-3857308;R-HSA-3790130
R-HSA-5625886	Activated PKN1 stimulates transcription of AR (androgen receptor) regulated genes KLK2 and KLK3	3	49	0.00384978	0.00929202	0.117734	8	11	0.00110055	9606	Homo sapiens	HIST2H2BE		R-HSA-5625797;R-HSA-5625796;R-HSA-5625774;R-HSA-5625870;R-HSA-5625849;R-HSA-5625784;R-HSA-5625848;R-HSA-5625883
R-HSA-427389	ERCC6 (CSB) and EHMT2 (G9a) positively regulate rRNA expression	3	49	0.00384978	0.00929202	0.117734	2	4	0.0004002	9606	Homo sapiens	HIST2H2BE		R-HSA-427383;R-HSA-427336
R-HSA-190828	Gap junction trafficking	3	50	0.00392835	0.00981116	0.117734	4	20	0.002001	9606	Homo sapiens	GJB6;GJB5		R-HSA-451056;R-HSA-190682;R-HSA-190698;R-HSA-190687
R-HSA-157858	Gap junction trafficking and regulation	3	54	0.00424261	0.0120547	0.13915	4	24	0.0024012	9606	Homo sapiens	GJB6;GJB5		R-HSA-451056;R-HSA-190682;R-HSA-190698;R-HSA-190687
R-HSA-2299718	Condensation of Prophase Chromosomes	3	55	0.00432118	0.0126577	0.13915	8	10	0.0010005	9606	Homo sapiens	HIST2H2BE		R-HSA-2245218;R-HSA-2288097;R-HSA-2301205;R-HSA-2294580;R-HSA-2172678;R-HSA-2294600;R-HSA-2294590;R-HSA-2294574
R-HSA-606279	Deposition of new CENPA-containing nucleosomes at the centromere	3	55	0.00432118	0.0126577	0.13915	2	4	0.0004002	9606	Homo sapiens	HIST2H2BE		R-HSA-606287;R-HSA-606289
R-HSA-774815	Nucleosome assembly	3	55	0.00432118	0.0126577	0.13915	2	4	0.0004002	9606	Homo sapiens	HIST2H2BE		R-HSA-606287;R-HSA-606289
R-HSA-5693571	Nonhomologous End-Joining (NHEJ)	3	57	0.00447832	0.013915	0.13915	4	13	0.00130065	9606	Homo sapiens	HIST2H2BE		R-HSA-5686900;R-HSA-5686704;R-HSA-5693599;R-HSA-5686685
R-HSA-912446	Meiotic recombination	3	60	0.00471402	0.0159296	0.149722	4	8	0.0008004	9606	Homo sapiens	HIST2H2BE		R-HSA-912458;R-HSA-912503;R-HSA-912496;R-HSA-1214188
R-HSA-3214847	HATs acetylate histones	4	110	0.00864236	0.0160962	0.149722	3	15	0.00150075	9606	Homo sapiens	HIST2H2BE		R-HSA-3662335;R-HSA-3697008;R-HSA-3318415
R-HSA-73777	RNA Polymerase I Chain Elongation	3	61	0.00479258	0.0166357	0.149722	1	1	0.00010005	9606	Homo sapiens	HIST2H2BE		R-HSA-74986
R-HSA-5250924	B-WICH complex positively regulates rRNA expression	3	62	0.00487115	0.0173592	0.156233	1	3	0.00030015	9606	Homo sapiens	HIST2H2BE		R-HSA-5250938
R-HSA-3214815	HDACs deacetylate histones	3	63	0.00494972	0.0181	0.1629	4	4	0.0004002	9606	Homo sapiens	HIST2H2BE		R-HSA-3777129;R-HSA-3782637;R-HSA-3782655;R-HSA-3769447
R-HSA-1221632	Meiotic synapsis	3	63	0.00494972	0.0181	0.1629	4	6	0.0006003	9606	Homo sapiens	HIST2H2BE		R-HSA-912408;R-HSA-912470;R-HSA-912467;R-HSA-912450
R-HSA-5693565	Recruitment and ATM-mediated phosphorylation of repair and signaling proteins at DNA double strand breaks	3	66	0.00518542	0.0204269	0.163415	29	35	0.00350175	9606	Homo sapiens	HIST2H2BE		R-HSA-5683735;R-HSA-5682967;R-HSA-69891;R-HSA-5682965;R-HSA-5683986;R-HSA-5682588;R-HSA-5683930;R-HSA-5682586;R-HSA-5683801;R-HSA-5682629;R-HSA-5683077;R-HSA-5693583;R-HSA-5683405;R-HSA-5682992;R-HSA-5693566;R-HSA-5683967;R-HSA-5683964;R-HSA-5683384;R-HSA-5683385;R-HSA-5682598;R-HSA-5682983;R-HSA-5693602;R-HSA-5693536;R-HSA-5683425;R-HSA-5682607;R-HSA-5682863;R-HSA-5693551;R-HSA-5693549;R-HSA-568…
R-HSA-201722	Formation of the beta-catenin:TCF transactivating complex	3	66	0.00518542	0.0204269	0.163415	2	13	0.00130065	9606	Homo sapiens	HIST2H2BE		R-HSA-3364026;R-HSA-3451147
R-HSA-2559586	DNA Damage/Telomere Stress Induced Senescence	3	72	0.00565682	0.0255522	0.180786	1	18	0.0018009	9606	Homo sapiens	HIST2H2BE		R-HSA-3785711
R-HSA-5619045	Defective SLC34A2 causes pulmonary alveolar microlithiasis (PALM)	1	3	0.000235701	0.0258265	0.180786	1	1	0.00010005	9606	Homo sapiens	SLC34A2		R-HSA-5651697
R-HSA-5687583	Defective SLC34A2 causes pulmonary alveolar microlithiasis (PALM)	1	3	0.000235701	0.0258265	0.180786	1	1	0.00010005	9606	Homo sapiens	SLC34A2		R-HSA-5687585
R-HSA-190827	Transport of connexins along the secretory pathway	1	3	0.000235701	0.0258265	0.180786	1	2	0.0002001	9606	Homo sapiens	GJB6		R-HSA-190698
R-HSA-190704	Oligomerization of connexins into connexons	1	3	0.000235701	0.0258265	0.180786	1	3	0.00030015	9606	Homo sapiens	GJB6		R-HSA-190687
R-HSA-5693606	DNA Double Strand Break Response	3	74	0.00581395	0.0274003	0.191802	29	44	0.0044022	9606	Homo sapiens	HIST2H2BE		R-HSA-5683735;R-HSA-5682967;R-HSA-69891;R-HSA-5682965;R-HSA-5683986;R-HSA-5682588;R-HSA-5683930;R-HSA-5682586;R-HSA-5683801;R-HSA-5682629;R-HSA-5683077;R-HSA-5693583;R-HSA-5683405;R-HSA-5682992;R-HSA-5693566;R-HSA-5683967;R-HSA-5683964;R-HSA-5683384;R-HSA-5683385;R-HSA-5682598;R-HSA-5682983;R-HSA-5693602;R-HSA-5693536;R-HSA-5683425;R-HSA-5682607;R-HSA-5682863;R-HSA-5693551;R-HSA-5693549;R-HSA-568…
R-HSA-157579	Telomere Maintenance	3	76	0.00597109	0.029318	0.205226	2	23	0.00230115	9606	Homo sapiens	HIST2H2BE		R-HSA-181450;R-HSA-176700
R-HSA-3000178	ECM proteoglycans	3	78	0.00612822	0.0313051	0.206492	5	22	0.0022011	9606	Homo sapiens	TNC;COL4A5;HAPLN1		R-HSA-2424246;R-HSA-2681681;R-HSA-2681667;R-HSA-2318623;R-HSA-2465883
R-HSA-5625740	RHO GTPases activate PKNs	3	79	0.00620679	0.0323246	0.206492	8	20	0.002001	9606	Homo sapiens	HIST2H2BE		R-HSA-5625797;R-HSA-5625796;R-HSA-5625774;R-HSA-5625870;R-HSA-5625849;R-HSA-5625784;R-HSA-5625848;R-HSA-5625883
R-HSA-427413	NoRC negatively regulates rRNA expression	3	81	0.00636392	0.0344154	0.206492	3	7	0.00070035	9606	Homo sapiens	HIST2H2BE		R-HSA-5227490;R-HSA-433672;R-HSA-427337
R-HSA-5250913	Positive epigenetic regulation of rRNA expression	3	81	0.00636392	0.0344154	0.206492	3	7	0.00070035	9606	Homo sapiens	HIST2H2BE		R-HSA-427383;R-HSA-5250938;R-HSA-427336
R-HSA-5578749	Transcriptional regulation by small RNAs	3	81	0.00636392	0.0344154	0.206492	1	5	0.00050025	9606	Homo sapiens	HIST2H2BE		R-HSA-5578742
R-HSA-69473	G2/M DNA damage checkpoint	3	81	0.00636392	0.0344154	0.206492	2	12	0.0012006	9606	Homo sapiens	HIST2H2BE		R-HSA-5683735;R-HSA-69891
R-HSA-73854	RNA Polymerase I Promoter Clearance	3	83	0.00652106	0.0365748	0.219449	1	9	0.00090045	9606	Homo sapiens	HIST2H2BE		R-HSA-73718
R-HSA-73864	RNA Polymerase I Transcription	3	86	0.00675676	0.0399417	0.23965	2	14	0.0014007	9606	Homo sapiens	HIST2H2BE		R-HSA-73718;R-HSA-74986
R-HSA-216083	Integrin cell surface interactions	3	87	0.00683532	0.0410978	0.246587	9	55	0.00550275	9606	Homo sapiens	FGG;TNC;COL4A5		R-HSA-114560;R-HSA-216082;R-HSA-216064;R-HSA-4539779;R-HSA-265426;R-HSA-216069;R-HSA-216068;R-HSA-216040;R-HSA-2327695
R-HSA-111465	Apoptotic cleavage of cellular proteins	2	38	0.00298554	0.0439245	0.24829	2	36	0.0036018	9606	Homo sapiens	PKP1;DSG3		R-HSA-201595;R-HSA-201631
R-HSA-5250941	Negative epigenetic regulation of rRNA expression	3	90	0.00707102	0.0446669	0.24829	6	12	0.0012006	9606	Homo sapiens	HIST2H2BE		R-HSA-427527;R-HSA-427514;R-HSA-5227490;R-HSA-433672;R-HSA-427528;R-HSA-427337
R-HSA-5693607	Processing of DNA double-strand break ends	3	90	0.00707102	0.0446669	0.24829	2	17	0.00170085	9606	Homo sapiens	HIST2H2BE		R-HSA-5684071;R-HSA-5684052
R-HSA-1500620	Meiosis	3	94	0.00738529	0.0496579	0.24829	8	14	0.0014007	9606	Homo sapiens	HIST2H2BE		R-HSA-912408;R-HSA-912458;R-HSA-912503;R-HSA-912470;R-HSA-912496;R-HSA-912467;R-HSA-1214188;R-HSA-912450
R-HSA-1307965	betaKlotho-mediated ligand binding	1	6	0.000471402	0.0509919	0.254959	2	2	0.0002001	9606	Homo sapiens	FGF19		R-HSA-1307955;R-HSA-1307963
R-HSA-427589	Type II Na+/Pi cotransporters	1	6	0.000471402	0.0509919	0.254959	1	2	0.0002001	9606	Homo sapiens	SLC34A2		R-HSA-427656
R-HSA-73886	Chromosome Maintenance	3	104	0.00817096	0.0632638	0.316319	4	27	0.00270135	9606	Homo sapiens	HIST2H2BE		R-HSA-606287;R-HSA-606289;R-HSA-181450;R-HSA-176700
R-HSA-380108	Chemokine receptors bind chemokines	2	48	0.00377121	0.0663053	0.331527	2	18	0.0018009	9606	Homo sapiens	CXCL6		R-HSA-373813;R-HSA-373791
R-HSA-427652	Sodium-coupled phosphate cotransporters	1	8	0.000628536	0.0674098	0.337049	1	3	0.00030015	9606	Homo sapiens	SLC34A2		R-HSA-427656
R-HSA-211000	Gene Silencing by RNA	3	115	0.0090352	0.079999	0.37988	1	35	0.00350175	9606	Homo sapiens	HIST2H2BE		R-HSA-5578742
R-HSA-5617472	Activation of anterior HOX genes in hindbrain development during early embryogenesis	3	116	0.00911376	0.0816075	0.37988	31	43	0.00430215	9606	Homo sapiens	HIST2H2BE		R-HSA-5617877;R-HSA-5617492;R-HSA-5617431;R-HSA-5617874;R-HSA-5621010;R-HSA-6810159;R-HSA-6810158;R-HSA-5617887;R-HSA-5617862;R-HSA-5617859;R-HSA-6810161;R-HSA-5617676;R-HSA-5617484;R-HSA-5693644;R-HSA-5617486;R-HSA-5617672;R-HSA-5617483;R-HSA-5617867;R-HSA-5621002;R-HSA-5617866;R-HSA-5617462;R-HSA-5617650;R-HSA-5617661;R-HSA-5617471;R-HSA-5617445;R-HSA-5617452;R-HSA-5617454;R-HSA-5617641;R-HSA-6…
R-HSA-5619507	Activation of HOX genes during differentiation	3	116	0.00911376	0.0816075	0.37988	31	43	0.00430215	9606	Homo sapiens	HIST2H2BE		R-HSA-5617877;R-HSA-5617492;R-HSA-5617431;R-HSA-5617874;R-HSA-5621010;R-HSA-6810159;R-HSA-6810158;R-HSA-5617887;R-HSA-5617862;R-HSA-5617859;R-HSA-6810161;R-HSA-5617676;R-HSA-5617484;R-HSA-5693644;R-HSA-5617486;R-HSA-5617672;R-HSA-5617483;R-HSA-5617867;R-HSA-5621002;R-HSA-5617866;R-HSA-5617462;R-HSA-5617650;R-HSA-5617661;R-HSA-5617471;R-HSA-5617445;R-HSA-5617452;R-HSA-5617454;R-HSA-5617641;R-HSA-6…
R-HSA-139915	Activation of PUMA and translocation to mitochondria	1	10	0.000785669	0.0835462	0.37988	2	5	0.00050025	9606	Homo sapiens	TP63		R-HSA-139913;R-HSA-4331340
R-HSA-75153	Apoptotic execution phase	2	55	0.00432118	0.0837612	0.37988	2	54	0.0054027	9606	Homo sapiens	PKP1;DSG3		R-HSA-201595;R-HSA-201631
R-HSA-2262752	Cellular responses to stress	8	522	0.0410119	0.0866035	0.37988	23	206	0.0206103	9606	Homo sapiens	CDKN2A;HIST2H2BE		R-HSA-3790137;R-HSA-182594;R-HSA-6804998;R-HSA-3857305;R-HSA-3229138;R-HSA-6804996;R-HSA-3209109;R-HSA-3857308;R-HSA-3209111;R-HSA-3200023;R-HSA-3209114;R-HSA-3790130;R-HSA-3209151;R-HSA-3788745;R-HSA-3222593;R-HSA-3229089;R-HSA-3223200;R-HSA-3788748;R-HSA-3785711;R-HSA-3240295;R-HSA-3209096;R-HSA-3209098;R-HSA-3229102
R-HSA-504046	RNA Polymerase I, RNA Polymerase III, and Mitochondrial Transcription	3	124	0.0097423	0.0949701	0.37988	2	42	0.0042021	9606	Homo sapiens	HIST2H2BE		R-HSA-73718;R-HSA-74986
R-HSA-5693567	HDR through Homologous Recombination (HR) or Single Strand Annealing (SSA)	3	124	0.0097423	0.0949701	0.37988	2	42	0.0042021	9606	Homo sapiens	HIST2H2BE		R-HSA-5684071;R-HSA-5684052
R-HSA-2179392	EGFR Transactivation by Gastrin	1	12	0.000942803	0.0994058	0.397623	2	6	0.0006003	9606	Homo sapiens	MMP10		R-HSA-2179413;R-HSA-2179402
R-HSA-3000171	Non-integrin membrane-ECM interactions	2	61	0.00479258	0.0996988	0.398795	2	22	0.0022011	9606	Homo sapiens	TNC;COL4A5		R-HSA-2681694;R-HSA-2327738
R-HSA-5693538	Homology Directed Repair	3	130	0.0102137	0.105543	0.422171	2	50	0.0050025	9606	Homo sapiens	HIST2H2BE		R-HSA-5684071;R-HSA-5684052
R-HSA-5689880	Ub-specific processing proteases	4	206	0.0161848	0.106566	0.426264	2	40	0.004002	9606	Homo sapiens	HIST2H2BE		R-HSA-5690080;R-HSA-5696960
R-HSA-6799990	Metal sequestration by antimicrobial proteins	1	13	0.00102137	0.107233	0.428933	1	5	0.00050025	9606	Homo sapiens	LTF		R-HSA-1222491
R-HSA-68875	Mitotic Prophase	3	132	0.0103708	0.109166	0.436113	8	33	0.00330165	9606	Homo sapiens	HIST2H2BE		R-HSA-2245218;R-HSA-2288097;R-HSA-2301205;R-HSA-2294580;R-HSA-2172678;R-HSA-2294600;R-HSA-2294590;R-HSA-2294574
R-HSA-190377	FGFR2b ligand binding and activation	1	14	0.00109994	0.114993	0.436113	2	3	0.00030015	9606	Homo sapiens	FGFBP1		R-HSA-5656070;R-HSA-190260
R-HSA-2214320	Anchoring fibril formation	1	15	0.0011785	0.122687	0.436113	1	4	0.0004002	9606	Homo sapiens	COL4A5		R-HSA-2396234
R-HSA-1428517	The citric acid (TCA) cycle and respiratory electron transport	4	218	0.0171276	0.123862	0.436113	1	58	0.0058029	9606	Homo sapiens	PKP1		R-HSA-203946
R-HSA-212165	Epigenetic regulation of gene expression	3	140	0.0109994	0.12413	0.436113	20	34	0.0034017	9606	Homo sapiens	HIST2H2BE		R-HSA-5334097;R-HSA-427527;R-HSA-5334160;R-HSA-5334099;R-HSA-212263;R-HSA-5334164;R-HSA-5250938;R-HSA-5227490;R-HSA-212269;R-HSA-433672;R-HSA-427528;R-HSA-427336;R-HSA-427337;R-HSA-427383;R-HSA-5334179;R-HSA-5334151;R-HSA-5334152;R-HSA-427514;R-HSA-212222;R-HSA-212252
R-HSA-1679131	Trafficking and processing of endosomal TLR	1	16	0.00125707	0.130314	0.436113	1	7	0.00070035	9606	Homo sapiens	CTSL2		R-HSA-1678981
R-HSA-190322	FGFR4 ligand binding and activation	1	17	0.00133564	0.137875	0.436113	4	4	0.0004002	9606	Homo sapiens	FGF19		R-HSA-1307955;R-HSA-190326;R-HSA-1307963;R-HSA-190265
R-HSA-6804759	Regulation of TP53 Activity through Association with Co-factors	1	17	0.00133564	0.137875	0.436113	2	11	0.00110055	9606	Homo sapiens	TP63		R-HSA-6799761;R-HSA-6799777
R-HSA-1222449	Mtb iron assimilation by chelation	1	17	0.00133564	0.137875	0.436113	1	8	0.0008004	9606	Homo sapiens	LTF		R-HSA-1222641
R-HSA-3232118	SUMOylation of transcription factors	1	17	0.00133564	0.137875	0.436113	1	9	0.00090045	9606	Homo sapiens	CDKN2A		R-HSA-2997706
R-HSA-1650814	Collagen biosynthesis and modifying enzymes	2	76	0.00597109	0.142632	0.436113	10	15	0.00150075	9606	Homo sapiens	COL4A5;LEPREL1		R-HSA-1650808;R-HSA-2002460;R-HSA-1981128;R-HSA-1980233;R-HSA-2022073;R-HSA-1981157;R-HSA-2089971;R-HSA-1981120;R-HSA-1981104;R-HSA-2002401
R-HSA-6803211	TP53 Regulates Transcription of Death Receptors and Ligands	1	18	0.0014142	0.145371	0.436113	2	7	0.00070035	9606	Homo sapiens	TP63		R-HSA-6799815;R-HSA-6800001
R-HSA-5687613	Diseases associated with surfactant metabolism	1	18	0.0014142	0.145371	0.436113	1	7	0.00070035	9606	Homo sapiens	SLC34A2		R-HSA-5687585
R-HSA-69481	G2/M Checkpoints	3	154	0.0120993	0.151959	0.44918	2	24	0.0024012	9606	Homo sapiens	HIST2H2BE		R-HSA-5683735;R-HSA-69891
R-HSA-5654228	Phospholipase C-mediated cascade; FGFR4	1	19	0.00149277	0.152803	0.44918	3	3	0.00030015	9606	Homo sapiens	FGF19		R-HSA-5654151;R-HSA-5654163;R-HSA-5654169
R-HSA-418885	DCC mediated attractive signaling	1	19	0.00149277	0.152803	0.44918	1	12	0.0012006	9606	Homo sapiens	ABLIM2		R-HSA-418865
R-HSA-354194	GRB2:SOS provides linkage to MAPK signaling for Integrins	1	20	0.00157134	0.16017	0.44918	2	2	0.0002001	9606	Homo sapiens	FGG		R-HSA-354165;R-HSA-354087
R-HSA-6788467	IL-6-type cytokine receptor ligand interactions	1	20	0.00157134	0.16017	0.44918	4	17	0.00170085	9606	Homo sapiens	CRLF1		R-HSA-6783670;R-HSA-6783556;R-HSA-5696490;R-HSA-6783530
R-HSA-6803207	TP53 Regulates Transcription of Caspase Activators and Caspases	1	20	0.00157134	0.16017	0.44918	2	17	0.00170085	9606	Homo sapiens	TP63		R-HSA-6798082;R-HSA-6798081
R-HSA-432047	Passive transport by Aquaporins	1	21	0.00164991	0.167474	0.44918	4	8	0.0008004	9606	Homo sapiens	AQP3		R-HSA-507871;R-HSA-507870;R-HSA-507869;R-HSA-507868
R-HSA-372708	p130Cas linkage to MAPK signaling for integrins	1	22	0.00172847	0.174715	0.44918	3	3	0.00030015	9606	Homo sapiens	FGG		R-HSA-372693;R-HSA-372705;R-HSA-372697
R-HSA-190872	Transport of connexons to the plasma membrane	1	22	0.00172847	0.174715	0.44918	1	3	0.00030015	9606	Homo sapiens	GJB6		R-HSA-451056
R-HSA-5693532	DNA Double-Strand Break Repair	3	167	0.0131207	0.179395	0.44918	35	107	0.0107054	9606	Homo sapiens	HIST2H2BE		R-HSA-5683735;R-HSA-5682967;R-HSA-69891;R-HSA-5684052;R-HSA-5682965;R-HSA-5683986;R-HSA-5693599;R-HSA-5682588;R-HSA-5686685;R-HSA-5683930;R-HSA-5682586;R-HSA-5683801;R-HSA-5682629;R-HSA-5683077;R-HSA-5693583;R-HSA-5683405;R-HSA-5686900;R-HSA-5686704;R-HSA-5682992;R-HSA-5693566;R-HSA-5683967;R-HSA-5683964;R-HSA-5683384;R-HSA-5683385;R-HSA-5682598;R-HSA-5682983;R-HSA-5684071;R-HSA-5693602;R-HSA-569…
R-HSA-3247509	Chromatin modifying enzymes	4	254	0.019956	0.182048	0.44918	7	83	0.00830415	9606	Homo sapiens	HIST2H2BE		R-HSA-3777129;R-HSA-3782637;R-HSA-3782655;R-HSA-3662335;R-HSA-3697008;R-HSA-3318415;R-HSA-3769447
R-HSA-4839726	Chromatin organization	4	254	0.019956	0.182048	0.44918	7	83	0.00830415	9606	Homo sapiens	HIST2H2BE		R-HSA-3777129;R-HSA-3782637;R-HSA-3782655;R-HSA-3662335;R-HSA-3697008;R-HSA-3318415;R-HSA-3769447
R-HSA-446728	Cell junction organization	2	92	0.00722816	0.191784	0.44918	1	35	0.00350175	9606	Homo sapiens	KRT14;KRT5		R-HSA-446077
R-HSA-5654720	PI-3K cascade:FGFR4	1	25	0.00196417	0.196066	0.44918	6	7	0.00070035	9606	Homo sapiens	FGF19		R-HSA-5654662;R-HSA-5654659;R-HSA-5654717;R-HSA-5654669;R-HSA-5654714;R-HSA-5654667
R-HSA-140875	Common Pathway of Fibrin Clot Formation	1	25	0.00196417	0.196066	0.44918	4	27	0.00270135	9606	Homo sapiens	FGG		R-HSA-140851;R-HSA-140599;R-HSA-140842;R-HSA-140840
R-HSA-190241	FGFR2 ligand binding and activation	1	26	0.00204274	0.20306	0.44918	2	5	0.00050025	9606	Homo sapiens	FGFBP1		R-HSA-5656070;R-HSA-190260
R-HSA-109581	Apoptosis	3	179	0.0140635	0.205822	0.44918	4	122	0.0122061	9606	Homo sapiens	PKP1;DSG3;TP63		R-HSA-201595;R-HSA-139913;R-HSA-201631;R-HSA-4331340
R-HSA-5654712	FRS-mediated FGFR4 signaling	1	27	0.00212131	0.209994	0.44918	8	8	0.0008004	9606	Homo sapiens	FGF19		R-HSA-5654422;R-HSA-5654663;R-HSA-5654418;R-HSA-5654658;R-HSA-5654655;R-HSA-5654653;R-HSA-5654651;R-HSA-5654664
R-HSA-3238698	WNT ligand biogenesis and trafficking	1	28	0.00219987	0.216869	0.44918	8	12	0.0012006	9606	Homo sapiens	WNT10A		R-HSA-3247840;R-HSA-3238691;R-HSA-3247843;R-HSA-3247844;R-HSA-3238694;R-HSA-3781941;R-HSA-3247837;R-HSA-3781943
R-HSA-6803205	TP53 regulates transcription of several additional cell death genes whose specific roles in p53-dependent apoptosis remain uncertain	1	28	0.00219987	0.216869	0.44918	4	19	0.00190095	9606	Homo sapiens	TP63		R-HSA-6799462;R-HSA-6800836;R-HSA-6799441;R-HSA-6800816
R-HSA-2453864	Retinoid cycle disease events	1	28	0.00219987	0.216869	0.44918	1	16	0.0016008	9606	Homo sapiens	LRAT		R-HSA-2466710
R-HSA-2474795	Diseases associated with visual transduction	1	28	0.00219987	0.216869	0.44918	1	17	0.00170085	9606	Homo sapiens	LRAT		R-HSA-2466710
R-HSA-5654719	SHC-mediated cascade:FGFR4	1	29	0.00227844	0.223684	0.44918	4	4	0.0004002	9606	Homo sapiens	FGF19		R-HSA-5654423;R-HSA-5654428;R-HSA-5654426;R-HSA-5654425
R-HSA-3000170	Syndecan interactions	1	29	0.00227844	0.223684	0.44918	1	15	0.00150075	9606	Homo sapiens	TNC		R-HSA-2681694
R-HSA-5357801	Programmed Cell Death	3	187	0.014692	0.223915	0.44918	4	135	0.0135068	9606	Homo sapiens	PKP1;DSG3;TP63		R-HSA-201595;R-HSA-139913;R-HSA-201631;R-HSA-4331340
R-HSA-69620	Cell Cycle Checkpoints	3	188	0.0147706	0.226199	0.44918	2	58	0.0058029	9606	Homo sapiens	HIST2H2BE		R-HSA-5683735;R-HSA-69891
R-HSA-375276	Peptide ligand-binding receptors	3	191	0.0150063	0.233079	0.44918	3	70	0.0070035	9606	Homo sapiens	CXCL6;EDN2		R-HSA-373813;R-HSA-388560;R-HSA-373791
R-HSA-3000157	Laminin interactions	1	31	0.00243558	0.237138	0.44918	3	15	0.00150075	9606	Homo sapiens	COL4A5		R-HSA-2328145;R-HSA-2426450;R-HSA-4084501
R-HSA-5686938	Regulation of TLR by endogenous ligand	1	31	0.00243558	0.237138	0.44918	1	12	0.0012006	9606	Homo sapiens	FGG		R-HSA-8870678
R-HSA-190236	Signaling by FGFR	2	107	0.00840666	0.239557	0.44918	30	138	0.0138069	9606	Homo sapiens	FGFBP1;FGF19		R-HSA-5654422;R-HSA-5654423;R-HSA-5654418;R-HSA-5654163;R-HSA-5654428;R-HSA-5654684;R-HSA-5654426;R-HSA-5654169;R-HSA-5654425;R-HSA-5654662;R-HSA-5656070;R-HSA-5654151;R-HSA-5654663;R-HSA-5654658;R-HSA-5654659;R-HSA-5654734;R-HSA-5654669;R-HSA-5654667;R-HSA-5654664;R-HSA-1307955;R-HSA-1307963;R-HSA-5654655;R-HSA-5654717;R-HSA-5654653;R-HSA-5654714;R-HSA-5654651;R-HSA-5654566;R-HSA-190326;R-HSA-19…
R-HSA-5688426	Deubiquitination	4	286	0.0224701	0.239937	0.44918	2	76	0.0076038	9606	Homo sapiens	HIST2H2BE		R-HSA-5690080;R-HSA-5696960
R-HSA-70635	Urea cycle	1	32	0.00251414	0.243779	0.44918	1	8	0.0008004	9606	Homo sapiens	CPS1		R-HSA-70555
R-HSA-6783589	Interleukin-6 family signaling	1	32	0.00251414	0.243779	0.44918	4	36	0.0036018	9606	Homo sapiens	CRLF1		R-HSA-6783670;R-HSA-6783556;R-HSA-5696490;R-HSA-6783530
R-HSA-6803204	TP53 Regulates Transcription of Genes Involved in Cytochrome C Release	1	33	0.00259271	0.250362	0.44918	4	25	0.00250125	9606	Homo sapiens	TP63		R-HSA-3700984;R-HSA-139913;R-HSA-3700981;R-HSA-4331340
R-HSA-5654716	Downstream signaling of activated FGFR4	1	35	0.00274984	0.263358	0.44918	21	22	0.0022011	9606	Homo sapiens	FGF19		R-HSA-5654422;R-HSA-5654423;R-HSA-5654418;R-HSA-5654163;R-HSA-5654655;R-HSA-5654428;R-HSA-5654717;R-HSA-5654653;R-HSA-5654714;R-HSA-5654426;R-HSA-5654651;R-HSA-5654169;R-HSA-5654425;R-HSA-5654662;R-HSA-5654151;R-HSA-5654663;R-HSA-5654658;R-HSA-5654659;R-HSA-5654669;R-HSA-5654667;R-HSA-5654664
R-HSA-5654733	Negative regulation of FGFR4 signaling	1	35	0.00274984	0.263358	0.44918	3	14	0.0014007	9606	Homo sapiens	FGF19		R-HSA-5654566;R-HSA-5654734;R-HSA-5654684
R-HSA-114452	Activation of BH3-only proteins	1	36	0.00282841	0.269772	0.44918	2	19	0.00190095	9606	Homo sapiens	TP63		R-HSA-139913;R-HSA-4331340
R-HSA-354192	Integrin alphaIIb beta3 signaling	1	38	0.00298554	0.282434	0.44918	15	24	0.0024012	9606	Homo sapiens	FGG		R-HSA-354149;R-HSA-429415;R-HSA-354087;R-HSA-372705;R-HSA-429441;R-HSA-354124;R-HSA-377644;R-HSA-377641;R-HSA-377640;R-HSA-377643;R-HSA-372693;R-HSA-354165;R-HSA-354066;R-HSA-372697;R-HSA-354073
R-HSA-201681	TCF dependent signaling in response to WNT	3	215	0.0168919	0.28924	0.44918	2	71	0.00710355	9606	Homo sapiens	HIST2H2BE		R-HSA-3364026;R-HSA-3451147
R-HSA-390522	Striated Muscle Contraction	1	40	0.00314268	0.294879	0.44918	4	4	0.0004002	9606	Homo sapiens	TNNT1		R-HSA-390597;R-HSA-390598;R-HSA-390593;R-HSA-390595
R-HSA-69231	Cyclin D associated events in G1	1	42	0.00329981	0.30711	0.44918	2	11	0.00110055	9606	Homo sapiens	CDKN2A		R-HSA-182594;R-HSA-69213
R-HSA-69236	G1 Phase	1	42	0.00329981	0.30711	0.44918	2	11	0.00110055	9606	Homo sapiens	CDKN2A		R-HSA-182594;R-HSA-69213
R-HSA-140877	Formation of Fibrin Clot (Clotting Cascade)	1	42	0.00329981	0.30711	0.44918	4	53	0.00530265	9606	Homo sapiens	FGG		R-HSA-140851;R-HSA-140599;R-HSA-140842;R-HSA-140840
R-HSA-6804757	Regulation of TP53 Degradation	1	42	0.00329981	0.30711	0.44918	2	30	0.0030015	9606	Homo sapiens	CDKN2A		R-HSA-6804998;R-HSA-6804996
R-HSA-419037	NCAM1 interactions	1	44	0.00345695	0.319131	0.44918	1	10	0.0010005	9606	Homo sapiens	COL4A5		R-HSA-375151
R-HSA-195721	Signaling by Wnt	4	329	0.0258485	0.32309	0.44918	10	153	0.0153077	9606	Homo sapiens	WNT10A;HIST2H2BE		R-HSA-3247840;R-HSA-3238691;R-HSA-3247843;R-HSA-3247844;R-HSA-3238694;R-HSA-3364026;R-HSA-3781941;R-HSA-3247837;R-HSA-3781943;R-HSA-3451147
R-HSA-6806003	Regulation of TP53 Expression and Degradation	1	45	0.00353551	0.325064	0.44918	2	35	0.00350175	9606	Homo sapiens	CDKN2A		R-HSA-6804998;R-HSA-6804996
R-HSA-6802948	Signaling by high-kinase activity BRAF mutants	1	46	0.00361408	0.330945	0.44918	4	6	0.0006003	9606	Homo sapiens	FGG		R-HSA-6802912;R-HSA-6802911;R-HSA-6802910;R-HSA-6803227
R-HSA-6802946	Signaling by moderate kinase activity BRAF mutants	1	47	0.00369265	0.336776	0.44918	4	7	0.00070035	9606	Homo sapiens	FGG		R-HSA-6802919;R-HSA-6802914;R-HSA-6803230;R-HSA-6802921
R-HSA-5674135	MAP2K and MAPK activation	1	47	0.00369265	0.336776	0.44918	4	8	0.0008004	9606	Homo sapiens	FGG		R-HSA-5672980;R-HSA-5672978;R-HSA-5672972;R-HSA-5672973
R-HSA-6802955	Paradoxical activation of RAF signaling by kinase inactive BRAF	1	48	0.00377121	0.342556	0.44918	4	7	0.00070035	9606	Homo sapiens	FGG		R-HSA-6802918;R-HSA-6803234;R-HSA-6802943;R-HSA-6802942
R-HSA-156588	Glucuronidation	1	49	0.00384978	0.348287	0.44918	1	8	0.0008004	9606	Homo sapiens	UGT2B15		R-HSA-174931
R-HSA-109606	Intrinsic Pathway for Apoptosis	1	49	0.00384978	0.348287	0.44918	2	46	0.0046023	9606	Homo sapiens	TP63		R-HSA-139913;R-HSA-4331340
R-HSA-2132295	MHC class II antigen presentation	2	142	0.0111565	0.351673	0.44918	3	23	0.00230115	9606	Homo sapiens	CTSL2		R-HSA-2130706;R-HSA-2130504;R-HSA-2130349
R-HSA-5654743	Signaling by FGFR4	1	50	0.00392835	0.353967	0.44918	28	40	0.004002	9606	Homo sapiens	FGF19		R-HSA-5654422;R-HSA-5654423;R-HSA-5654418;R-HSA-5654163;R-HSA-5654428;R-HSA-5654684;R-HSA-5654426;R-HSA-5654169;R-HSA-5654425;R-HSA-5654662;R-HSA-5654151;R-HSA-5654663;R-HSA-5654658;R-HSA-5654659;R-HSA-5654734;R-HSA-5654669;R-HSA-5654667;R-HSA-5654664;R-HSA-1307955;R-HSA-1307963;R-HSA-5654655;R-HSA-5654717;R-HSA-5654653;R-HSA-5654714;R-HSA-5654651;R-HSA-5654566;R-HSA-190326;R-HSA-190265
R-HSA-373752	Netrin-1 signaling	1	50	0.00392835	0.353967	0.44918	1	31	0.00310155	9606	Homo sapiens	ABLIM2		R-HSA-418865
R-HSA-1500931	Cell-Cell communication	2	144	0.0113136	0.357964	0.44918	1	63	0.00630315	9606	Homo sapiens	KRT14;KRT5		R-HSA-446077
R-HSA-432040	Vasopressin regulates renal water homeostasis via Aquaporins	1	51	0.00400691	0.359599	0.44918	1	14	0.0014007	9606	Homo sapiens	AQP3		R-HSA-445714
R-HSA-5423646	Aflatoxin activation and detoxification	1	51	0.00400691	0.359599	0.44918	1	17	0.00170085	9606	Homo sapiens	CPS1		R-HSA-5433074
R-HSA-76009	Platelet Aggregation (Plug Formation)	1	52	0.00408548	0.365182	0.44918	15	27	0.00270135	9606	Homo sapiens	FGG		R-HSA-354149;R-HSA-429415;R-HSA-354087;R-HSA-372705;R-HSA-429441;R-HSA-354124;R-HSA-377644;R-HSA-377641;R-HSA-377640;R-HSA-377643;R-HSA-372693;R-HSA-354165;R-HSA-354066;R-HSA-372697;R-HSA-354073
R-HSA-5683826	Surfactant metabolism	1	52	0.00408548	0.365182	0.44918	1	26	0.0026013	9606	Homo sapiens	SLC34A2		R-HSA-427656
R-HSA-2453902	The canonical retinoid cycle in rods (twilight vision)	1	56	0.00439975	0.387036	0.44918	1	23	0.00230115	9606	Homo sapiens	LRAT		R-HSA-2453855
R-HSA-6802949	Signaling by RAS mutants	1	57	0.00447832	0.392382	0.44918	4	8	0.0008004	9606	Homo sapiens	FGG		R-HSA-6803233;R-HSA-6802926;R-HSA-6802925;R-HSA-6802922
R-HSA-1222556	ROS, RNS production in response to bacteria	1	57	0.00447832	0.392382	0.44918	1	16	0.0016008	9606	Homo sapiens	LTF		R-HSA-1222491
R-HSA-6794361	Interactions of neurexins and neuroligins at synapses	1	60	0.00471402	0.408145	0.44918	1	19	0.00190095	9606	Homo sapiens	SYT12		R-HSA-6794348
R-HSA-445717	Aquaporin-mediated transport	1	67	0.00526398	0.443365	0.44918	5	24	0.0024012	9606	Homo sapiens	AQP3		R-HSA-445714;R-HSA-507871;R-HSA-507870;R-HSA-507869;R-HSA-507868
R-HSA-6802952	Signaling by BRAF and RAF fusions	1	68	0.00534255	0.448224	0.44918	4	5	0.00050025	9606	Homo sapiens	FGG		R-HSA-6802935;R-HSA-6802934;R-HSA-6802933;R-HSA-6802932
R-HSA-2168880	Scavenging of heme from plasma	2	174	0.0136706	0.44918	0.44918	4	12	0.0012006	9606	Homo sapiens	HP		R-HSA-2168883;R-HSA-2168885;R-HSA-2230938;R-HSA-2168889
R-HSA-70895	Branched-chain amino acid catabolism	1	69	0.00542112	0.453041	0.453041	1	26	0.0026013	9606	Homo sapiens	PKP1		R-HSA-5693148
R-HSA-5633007	Regulation of TP53 Activity	2	177	0.0139063	0.457916	0.457916	4	98	0.0098049	9606	Homo sapiens	CDKN2A;TP63		R-HSA-6804998;R-HSA-6804996;R-HSA-6799761;R-HSA-6799777
R-HSA-1222499	Response of Mtb to phagocytosis	1	72	0.00565682	0.467243	0.467243	1	32	0.0032016	9606	Homo sapiens	LTF		R-HSA-1222641
R-HSA-1222352	Latent infection of Homo sapiens with Mycobacterium tuberculosis	1	72	0.00565682	0.467243	0.467243	1	32	0.0032016	9606	Homo sapiens	LTF		R-HSA-1222641
R-HSA-168898	Toll-Like Receptors Cascades	2	181	0.0142206	0.469441	0.469441	2	161	0.0161081	9606	Homo sapiens	FGG;CTSL2		R-HSA-8870678;R-HSA-1678981
R-HSA-975634	Retinoid metabolism and transport	1	75	0.00589252	0.481079	0.481079	2	27	0.00270135	9606	Homo sapiens	LRAT		R-HSA-975608;R-HSA-2404137
R-HSA-6794362	Protein-protein interactions at synapses	1	76	0.00597109	0.485612	0.485612	1	27	0.00270135	9606	Homo sapiens	SYT12		R-HSA-6794348
R-HSA-375165	NCAM signaling for neurite out-growth	3	304	0.0238843	0.496289	0.496289	6	62	0.0062031	9606	Homo sapiens	FGF19;FGG;COL4A5		R-HSA-5672980;R-HSA-5672965;R-HSA-5672978;R-HSA-375151;R-HSA-5672972;R-HSA-5672973
R-HSA-3108214	SUMOylation of DNA damage response and repair proteins	1	79	0.00620679	0.498976	0.498976	1	24	0.0024012	9606	Homo sapiens	CDKN2A		R-HSA-4568846
R-HSA-195258	RHO GTPase Effectors	3	307	0.0241201	0.502842	0.502842	8	103	0.0103052	9606	Homo sapiens	HIST2H2BE		R-HSA-5625797;R-HSA-5625796;R-HSA-5625774;R-HSA-5625870;R-HSA-5625849;R-HSA-5625784;R-HSA-5625848;R-HSA-5625883
R-HSA-5633008	TP53 Regulates Transcription of Cell Death Genes	1	83	0.00652106	0.51626	0.51626	12	68	0.0068034	9606	Homo sapiens	TP63		R-HSA-3700984;R-HSA-6799815;R-HSA-6799462;R-HSA-6800836;R-HSA-6798082;R-HSA-6798081;R-HSA-6799441;R-HSA-6800001;R-HSA-6800816;R-HSA-139913;R-HSA-3700981;R-HSA-4331340
R-HSA-6802957	Oncogenic MAPK signaling	1	84	0.00659962	0.520488	0.520488	20	34	0.0034017	9606	Homo sapiens	FGG		R-HSA-6802919;R-HSA-6802918;R-HSA-6802914;R-HSA-6803234;R-HSA-6803233;R-HSA-6802912;R-HSA-6802926;R-HSA-6802925;R-HSA-6802922;R-HSA-6802921;R-HSA-6802935;R-HSA-6802934;R-HSA-6802933;R-HSA-6802932;R-HSA-6802911;R-HSA-6802943;R-HSA-6802910;R-HSA-6803230;R-HSA-6802942;R-HSA-6803227
R-HSA-68886	M Phase	3	319	0.0250629	0.528618	0.528618	8	63	0.00630315	9606	Homo sapiens	HIST2H2BE		R-HSA-2245218;R-HSA-2288097;R-HSA-2301205;R-HSA-2294580;R-HSA-2172678;R-HSA-2294600;R-HSA-2294590;R-HSA-2294574
R-HSA-5654738	Signaling by FGFR2	1	88	0.00691389	0.537037	0.537037	2	45	0.00450225	9606	Homo sapiens	FGFBP1		R-HSA-5656070;R-HSA-190260
R-HSA-5683057	MAPK family signaling cascades	3	324	0.0254557	0.539142	0.539142	6	86	0.0086043	9606	Homo sapiens	FGF19;FGG;MMP10		R-HSA-5672980;R-HSA-5672965;R-HSA-5672978;R-HSA-5672972;R-HSA-5672973;R-HSA-5687099
R-HSA-2219530	Constitutive Signaling by Aberrant PI3K in Cancer	1	89	0.00699246	0.541084	0.541084	1	2	0.0002001	9606	Homo sapiens	FGF19		R-HSA-2400009
R-HSA-373080	Class B/2 (Secretin family receptors)	1	91	0.00714959	0.549075	0.549075	1	17	0.00170085	9606	Homo sapiens	WNT10A		R-HSA-201708
R-HSA-6806667	Metabolism of fat-soluble vitamins	1	94	0.00738529	0.560804	0.560804	2	43	0.00430215	9606	Homo sapiens	LRAT		R-HSA-975608;R-HSA-2404137
R-HSA-109704	PI3K Cascade	1	96	0.00754243	0.568455	0.568455	1	33	0.00330165	9606	Homo sapiens	FGF19		R-HSA-109699
R-HSA-1236977	Endosomal/Vacuolar pathway	1	99	0.00777813	0.579684	0.579684	1	4	0.0004002	9606	Homo sapiens	CTSL2		R-HSA-1236948
R-HSA-73894	DNA Repair	3	346	0.0271842	0.583832	0.583832	35	305	0.0305153	9606	Homo sapiens	HIST2H2BE		R-HSA-5683735;R-HSA-5682967;R-HSA-69891;R-HSA-5684052;R-HSA-5682965;R-HSA-5683986;R-HSA-5693599;R-HSA-5682588;R-HSA-5686685;R-HSA-5683930;R-HSA-5682586;R-HSA-5683801;R-HSA-5682629;R-HSA-5683077;R-HSA-5693583;R-HSA-5683405;R-HSA-5686900;R-HSA-5686704;R-HSA-5682992;R-HSA-5693566;R-HSA-5683967;R-HSA-5683964;R-HSA-5683384;R-HSA-5683385;R-HSA-5682598;R-HSA-5682983;R-HSA-5684071;R-HSA-5693602;R-HSA-569…
R-HSA-3108232	SUMO E3 ligases SUMOylate target proteins	1	103	0.00809239	0.594206	0.594206	2	46	0.0046023	9606	Homo sapiens	CDKN2A		R-HSA-2997706;R-HSA-4568846
R-HSA-6811558	PI5P, PP2A and IER3 Regulate PI3K/AKT Signaling	1	105	0.00824953	0.60128	0.60128	1	7	0.00070035	9606	Homo sapiens	FGF19		R-HSA-2316434
R-HSA-5687128	MAPK6/MAPK4 signaling	1	105	0.00824953	0.60128	0.60128	1	40	0.004002	9606	Homo sapiens	MMP10		R-HSA-5687099
R-HSA-6798695	Neutrophil degranulation	4	480	0.0377121	0.606253	0.606253	4	10	0.0010005	9606	Homo sapiens	HP;PKP1;KRT5;LTF		R-HSA-6800434;R-HSA-6798749;R-HSA-6800426;R-HSA-6798745
R-HSA-2173782	Binding and Uptake of Ligands by Scavenger Receptors	2	236	0.0185418	0.612104	0.612104	4	32	0.0032016	9606	Homo sapiens	HP		R-HSA-2168883;R-HSA-2168885;R-HSA-2230938;R-HSA-2168889
R-HSA-2990846	SUMOylation	1	112	0.0087995	0.625089	0.625089	2	55	0.00550275	9606	Homo sapiens	CDKN2A		R-HSA-2997706;R-HSA-4568846
R-HSA-199418	Negative regulation of the PI3K/AKT network	1	114	0.00895663	0.631629	0.631629	1	10	0.0010005	9606	Homo sapiens	FGF19		R-HSA-2316434
R-HSA-881907	Gastrin-CREB signalling pathway via PKC and MAPK	4	504	0.0395977	0.644668	0.644668	10	68	0.0068034	9606	Homo sapiens	EDN2;FGF19;FGG;MMP10		R-HSA-5672980;R-HSA-5672965;R-HSA-749448;R-HSA-2179413;R-HSA-5672978;R-HSA-749452;R-HSA-5672972;R-HSA-2179402;R-HSA-5672973;R-HSA-379048
R-HSA-2672351	Stimuli-sensing channels	1	120	0.00942803	0.650578	0.650578	4	24	0.0024012	9606	Homo sapiens	CLCA2		R-HSA-2744361;R-HSA-5333671;R-HSA-2744242;R-HSA-2684901
R-HSA-2219528	PI3K/AKT Signaling in Cancer	1	120	0.00942803	0.650578	0.650578	1	21	0.00210105	9606	Homo sapiens	FGF19		R-HSA-2400009
R-HSA-6803157	Antimicrobial peptides	1	122	0.00958517	0.656678	0.656678	2	57	0.00570285	9606	Homo sapiens	LTF		R-HSA-6810643;R-HSA-1222491
R-HSA-373076	Class A/1 (Rhodopsin-like receptors)	3	390	0.0306411	0.664688	0.664688	3	137	0.0137069	9606	Homo sapiens	CXCL6;EDN2		R-HSA-373813;R-HSA-388560;R-HSA-373791
R-HSA-5628897	TP53 Regulates Metabolic Genes	1	125	0.00982087	0.665629	0.665629	2	34	0.0034017	9606	Homo sapiens	TP63		R-HSA-5632386;R-HSA-5632393
R-HSA-5673001	RAF/MAP kinase cascade	2	267	0.0209774	0.678855	0.678855	5	39	0.00390195	9606	Homo sapiens	FGF19;FGG		R-HSA-5672980;R-HSA-5672965;R-HSA-5672978;R-HSA-5672972;R-HSA-5672973
R-HSA-112412	SOS-mediated signalling	2	267	0.0209774	0.678855	0.678855	5	41	0.00410205	9606	Homo sapiens	FGF19;FGG		R-HSA-5672980;R-HSA-5672965;R-HSA-5672978;R-HSA-5672972;R-HSA-5672973
R-HSA-179812	GRB2 events in EGFR signaling	2	267	0.0209774	0.678855	0.678855	5	42	0.0042021	9606	Homo sapiens	FGF19;FGG		R-HSA-5672980;R-HSA-5672965;R-HSA-5672978;R-HSA-5672972;R-HSA-5672973
R-HSA-180336	SHC1 events in EGFR signaling	2	267	0.0209774	0.678855	0.678855	5	43	0.00430215	9606	Homo sapiens	FGF19;FGG		R-HSA-5672980;R-HSA-5672965;R-HSA-5672978;R-HSA-5672972;R-HSA-5672973
R-HSA-1250347	SHC1 events in ERBB4 signaling	2	267	0.0209774	0.678855	0.678855	5	43	0.00430215	9606	Homo sapiens	FGF19;FGG		R-HSA-5672980;R-HSA-5672965;R-HSA-5672978;R-HSA-5672972;R-HSA-5672973
R-HSA-69278	Cell Cycle, Mitotic	4	532	0.0417976	0.686327	0.686327	10	293	0.0293147	9606	Homo sapiens	CDKN2A;HIST2H2BE		R-HSA-2245218;R-HSA-182594;R-HSA-2288097;R-HSA-2301205;R-HSA-2294580;R-HSA-2172678;R-HSA-2294600;R-HSA-69213;R-HSA-2294590;R-HSA-2294574
R-HSA-187706	Signalling to p38 via RIT and RIN	2	272	0.0213702	0.688709	0.688709	5	42	0.0042021	9606	Homo sapiens	FGF19;FGG		R-HSA-5672980;R-HSA-5672965;R-HSA-5672978;R-HSA-5672972;R-HSA-5672973
R-HSA-170984	ARMS-mediated activation	2	272	0.0213702	0.688709	0.688709	5	44	0.0044022	9606	Homo sapiens	FGF19;FGG		R-HSA-5672980;R-HSA-5672965;R-HSA-5672978;R-HSA-5672972;R-HSA-5672973
R-HSA-170968	Frs2-mediated activation	2	274	0.0215273	0.692582	0.692582	5	45	0.00450225	9606	Homo sapiens	FGF19;FGG		R-HSA-5672980;R-HSA-5672965;R-HSA-5672978;R-HSA-5672972;R-HSA-5672973
R-HSA-5684996	MAPK1/MAPK3 signaling	2	274	0.0215273	0.692582	0.692582	5	46	0.0046023	9606	Homo sapiens	FGF19;FGG		R-HSA-5672980;R-HSA-5672965;R-HSA-5672978;R-HSA-5672972;R-HSA-5672973
R-HSA-2586552	Signaling by Leptin	2	275	0.0216059	0.694503	0.694503	5	58	0.0058029	9606	Homo sapiens	FGF19;FGG		R-HSA-5672980;R-HSA-5672965;R-HSA-5672978;R-HSA-5672972;R-HSA-5672973
R-HSA-169893	Prolonged ERK activation events	2	276	0.0216845	0.696415	0.696415	5	50	0.0050025	9606	Homo sapiens	FGF19;FGG		R-HSA-5672980;R-HSA-5672965;R-HSA-5672978;R-HSA-5672972;R-HSA-5672973
R-HSA-912526	Interleukin receptor SHC signaling	2	277	0.021763	0.698317	0.698317	5	45	0.00450225	9606	Homo sapiens	FGF19;FGG		R-HSA-5672980;R-HSA-5672965;R-HSA-5672978;R-HSA-5672972;R-HSA-5672973
R-HSA-114608	Platelet degranulation	1	137	0.0107637	0.69918	0.69918	1	11	0.00110055	9606	Homo sapiens	FGG		R-HSA-481007
R-HSA-167044	Signalling to RAS	2	278	0.0218416	0.700209	0.700209	5	49	0.00490245	9606	Homo sapiens	FGF19;FGG		R-HSA-5672980;R-HSA-5672965;R-HSA-5672978;R-HSA-5672972;R-HSA-5672973
R-HSA-451927	Interleukin-2 signaling	2	284	0.022313	0.711359	0.711359	5	64	0.0064032	9606	Homo sapiens	FGF19;FGG		R-HSA-5672980;R-HSA-5672965;R-HSA-5672978;R-HSA-5672972;R-HSA-5672973
R-HSA-351202	Metabolism of polyamines	1	142	0.0111565	0.712155	0.712155	1	38	0.0038019	9606	Homo sapiens	CPS1		R-HSA-70555
R-HSA-186797	Signaling by PDGF	3	420	0.0329981	0.713013	0.713013	7	117	0.0117059	9606	Homo sapiens	FGF19;FGG;COL4A5		R-HSA-2316434;R-HSA-5672980;R-HSA-382054;R-HSA-5672965;R-HSA-5672978;R-HSA-5672972;R-HSA-5672973
R-HSA-5218921	VEGFR2 mediated cell proliferation	2	285	0.0223916	0.713183	0.713183	5	51	0.00510255	9606	Homo sapiens	FGF19;FGG		R-HSA-5672980;R-HSA-5672965;R-HSA-5672978;R-HSA-5672972;R-HSA-5672973
R-HSA-187687	Signalling to ERKs	2	287	0.0225487	0.716804	0.716804	5	63	0.00630315	9606	Homo sapiens	FGF19;FGG		R-HSA-5672980;R-HSA-5672965;R-HSA-5672978;R-HSA-5672972;R-HSA-5672973
R-HSA-76005	Response to elevated platelet cytosolic Ca2+	1	144	0.0113136	0.717188	0.717188	1	14	0.0014007	9606	Homo sapiens	FGG		R-HSA-481007
R-HSA-453279	Mitotic G1-G1/S phases	1	146	0.0114708	0.722134	0.722134	2	55	0.00550275	9606	Homo sapiens	CDKN2A		R-HSA-182594;R-HSA-69213
R-HSA-8853659	RET signaling	2	292	0.0229415	0.725689	0.725689	5	63	0.00630315	9606	Homo sapiens	FGF19;FGG		R-HSA-5672980;R-HSA-5672965;R-HSA-5672978;R-HSA-5672972;R-HSA-5672973
R-HSA-512988	Interleukin-3, 5 and GM-CSF signaling	2	293	0.0230201	0.727438	0.727438	5	77	0.00770385	9606	Homo sapiens	FGF19;FGG		R-HSA-5672980;R-HSA-5672965;R-HSA-5672978;R-HSA-5672972;R-HSA-5672973
R-HSA-5619102	SLC transporter disorders	1	149	0.0117065	0.729392	0.729392	1	65	0.00650325	9606	Homo sapiens	SLC34A2		R-HSA-5651697
R-HSA-1257604	PIP3 activates AKT signaling	1	150	0.011785	0.73177	0.73177	1	33	0.00330165	9606	Homo sapiens	FGF19		R-HSA-2316434
R-HSA-1250342	PI3K events in ERBB4 signaling	1	150	0.011785	0.73177	0.73177	1	36	0.0036018	9606	Homo sapiens	FGF19		R-HSA-2316434
R-HSA-73923	Lipid digestion, mobilization, and transport	1	151	0.0118636	0.734126	0.734126	1	111	0.0111056	9606	Homo sapiens	C7orf68		R-HSA-8858270
R-HSA-449147	Signaling by Interleukins	3	436	0.0342552	0.736537	0.736537	9	218	0.0218109	9606	Homo sapiens	FGF19;FGG;CRLF1		R-HSA-6783670;R-HSA-5672980;R-HSA-6783556;R-HSA-5672965;R-HSA-5672978;R-HSA-5672972;R-HSA-5672973;R-HSA-5696490;R-HSA-6783530
R-HSA-198203	PI3K/AKT activation	1	153	0.0120207	0.738779	0.738779	1	38	0.0038019	9606	Homo sapiens	FGF19		R-HSA-2316434
R-HSA-180292	GAB1 signalosome	1	153	0.0120207	0.738779	0.738779	1	46	0.0046023	9606	Homo sapiens	FGF19		R-HSA-2316434
R-HSA-194315	Signaling by Rho GTPases	3	438	0.0344123	0.739369	0.739369	8	108	0.0108054	9606	Homo sapiens	HIST2H2BE		R-HSA-5625797;R-HSA-5625796;R-HSA-5625774;R-HSA-5625870;R-HSA-5625849;R-HSA-5625784;R-HSA-5625848;R-HSA-5625883
R-HSA-500792	GPCR ligand binding	4	573	0.0450189	0.74102	0.74102	4	161	0.0161081	9606	Homo sapiens	CXCL6;WNT10A;EDN2		R-HSA-373813;R-HSA-388560;R-HSA-373791;R-HSA-201708
R-HSA-425393	Transport of inorganic cations/anions and amino acids/oligopeptides	1	158	0.0124136	0.750059	0.750059	1	73	0.00730365	9606	Homo sapiens	SLC34A2		R-HSA-427656
R-HSA-173623	Classical antibody-mediated complement activation	1	165	0.0129635	0.765045	0.765045	1	2	0.0002001	9606	Homo sapiens	APCS		R-HSA-173626
R-HSA-2187338	Visual phototransduction	1	165	0.0129635	0.765045	0.765045	3	88	0.0088044	9606	Homo sapiens	LRAT		R-HSA-975608;R-HSA-2453855;R-HSA-2404137
R-HSA-112399	IRS-mediated signalling	2	319	0.0250629	0.769718	0.769718	6	74	0.0074037	9606	Homo sapiens	FGF19;FGG		R-HSA-109699;R-HSA-5672980;R-HSA-5672965;R-HSA-5672978;R-HSA-5672972;R-HSA-5672973
R-HSA-422475	Axon guidance	4	598	0.046983	0.770707	0.770707	7	286	0.0286143	9606	Homo sapiens	ABLIM2;FGF19;FGG;COL4A5		R-HSA-5672980;R-HSA-5672965;R-HSA-5672978;R-HSA-418865;R-HSA-375151;R-HSA-5672972;R-HSA-5672973
R-HSA-5663202	Diseases of signal transduction	3	464	0.0364551	0.774053	0.774053	22	297	0.0297149	9606	Homo sapiens	FGF19;FGG;LRAT		R-HSA-6802919;R-HSA-6802918;R-HSA-6802914;R-HSA-6803234;R-HSA-6803233;R-HSA-6802912;R-HSA-6802926;R-HSA-6802925;R-HSA-2400009;R-HSA-6802922;R-HSA-6802921;R-HSA-6802935;R-HSA-6802934;R-HSA-6802933;R-HSA-2466710;R-HSA-6802932;R-HSA-6802911;R-HSA-6802943;R-HSA-6802910;R-HSA-6803230;R-HSA-6802942;R-HSA-6803227
R-HSA-74751	Insulin receptor signalling cascade	2	322	0.0252986	0.774215	0.774215	6	90	0.0090045	9606	Homo sapiens	FGF19;FGG		R-HSA-109699;R-HSA-5672980;R-HSA-5672965;R-HSA-5672978;R-HSA-5672972;R-HSA-5672973
R-HSA-2428928	IRS-related events triggered by IGF1R	2	323	0.0253771	0.775697	0.775697	6	77	0.00770385	9606	Homo sapiens	FGF19;FGG		R-HSA-109699;R-HSA-5672980;R-HSA-5672965;R-HSA-5672978;R-HSA-5672972;R-HSA-5672973
R-HSA-2428924	IGF1R signaling cascade	2	324	0.0254557	0.77717	0.77717	6	82	0.0082041	9606	Homo sapiens	FGF19;FGG		R-HSA-109699;R-HSA-5672980;R-HSA-5672965;R-HSA-5672978;R-HSA-5672972;R-HSA-5672973
R-HSA-2404192	Signaling by Type 1 Insulin-like Growth Factor 1 Receptor (IGF1R)	2	325	0.0255343	0.778635	0.778635	6	84	0.0084042	9606	Homo sapiens	FGF19;FGG		R-HSA-109699;R-HSA-5672980;R-HSA-5672965;R-HSA-5672978;R-HSA-5672972;R-HSA-5672973
R-HSA-418594	G alpha (i) signalling events	2	326	0.0256128	0.780092	0.780092	3	8	0.0008004	9606	Homo sapiens	CXCL6		R-HSA-749454;R-HSA-749456;R-HSA-380073
R-HSA-166786	Creation of C4 and C2 activators	1	177	0.0139063	0.788692	0.788692	1	7	0.00070035	9606	Homo sapiens	APCS		R-HSA-173626
R-HSA-166663	Initial triggering of complement	1	188	0.0147706	0.808289	0.808289	1	20	0.002001	9606	Homo sapiens	APCS		R-HSA-173626
R-HSA-74752	Signaling by Insulin receptor	2	347	0.0272627	0.808816	0.808816	6	99	0.00990495	9606	Homo sapiens	FGF19;FGG		R-HSA-109699;R-HSA-5672980;R-HSA-5672965;R-HSA-5672978;R-HSA-5672972;R-HSA-5672973
R-HSA-1640170	Cell Cycle	4	644	0.0505971	0.818379	0.818379	24	382	0.0382191	9606	Homo sapiens	CDKN2A;HIST2H2BE		R-HSA-2245218;R-HSA-182594;R-HSA-5683735;R-HSA-69891;R-HSA-2288097;R-HSA-606287;R-HSA-2172678;R-HSA-912458;R-HSA-181450;R-HSA-2294600;R-HSA-2294574;R-HSA-912450;R-HSA-912408;R-HSA-2301205;R-HSA-2294580;R-HSA-606289;R-HSA-912503;R-HSA-912470;R-HSA-69213;R-HSA-2294590;R-HSA-912496;R-HSA-912467;R-HSA-176700;R-HSA-1214188
R-HSA-1236975	Antigen processing-Cross presentation	1	203	0.0159491	0.832139	0.832139	1	21	0.00210105	9606	Homo sapiens	CTSL2		R-HSA-1236948
R-HSA-1433557	Signaling by SCF-KIT	2	367	0.0288341	0.833046	0.833046	6	108	0.0108054	9606	Homo sapiens	FGF19;FGG		R-HSA-2316434;R-HSA-5672980;R-HSA-5672965;R-HSA-5672978;R-HSA-5672972;R-HSA-5672973
R-HSA-4420097	VEGFA-VEGFR2 Pathway	2	372	0.0292269	0.838659	0.838659	5	115	0.0115058	9606	Homo sapiens	FGF19;FGG		R-HSA-5672980;R-HSA-5672965;R-HSA-5672978;R-HSA-5672972;R-HSA-5672973
R-HSA-1236394	Signaling by ERBB4	2	373	0.0293055	0.839761	0.839761	6	117	0.0117059	9606	Homo sapiens	FGF19;FGG		R-HSA-2316434;R-HSA-5672980;R-HSA-5672965;R-HSA-5672978;R-HSA-5672972;R-HSA-5672973
R-HSA-166658	Complement cascade	1	211	0.0165776	0.843631	0.843631	1	60	0.006003	9606	Homo sapiens	APCS		R-HSA-173626
R-HSA-397014	Muscle contraction	1	214	0.0168133	0.847737	0.847737	4	40	0.004002	9606	Homo sapiens	TNNT1		R-HSA-390597;R-HSA-390598;R-HSA-390593;R-HSA-390595
R-HSA-194138	Signaling by VEGF	2	381	0.029934	0.848338	0.848338	5	121	0.0121061	9606	Homo sapiens	FGF19;FGG		R-HSA-5672980;R-HSA-5672965;R-HSA-5672978;R-HSA-5672972;R-HSA-5672973
R-HSA-5668914	Diseases of metabolism	1	218	0.0171276	0.853046	0.853046	1	95	0.00950475	9606	Homo sapiens	SLC34A2		R-HSA-5687585
R-HSA-186763	Downstream signal transduction	2	389	0.0305625	0.8565	0.8565	6	105	0.0105053	9606	Homo sapiens	FGF19;FGG		R-HSA-2316434;R-HSA-5672980;R-HSA-5672965;R-HSA-5672978;R-HSA-5672972;R-HSA-5672973
R-HSA-2424491	DAP12 signaling	2	392	0.0307982	0.859457	0.859457	6	106	0.0106053	9606	Homo sapiens	FGF19;FGG		R-HSA-2316434;R-HSA-5672980;R-HSA-5672965;R-HSA-5672978;R-HSA-5672972;R-HSA-5672973
R-HSA-1168372	Downstream signaling events of B Cell Receptor (BCR)	1	226	0.0177561	0.863118	0.863118	1	45	0.00450225	9606	Homo sapiens	FGF19		R-HSA-2316434
R-HSA-177929	Signaling by EGFR	2	402	0.0315839	0.86892	0.86892	6	139	0.013907	9606	Homo sapiens	FGF19;FGG		R-HSA-2316434;R-HSA-5672980;R-HSA-5672965;R-HSA-5672978;R-HSA-5672972;R-HSA-5672973
R-HSA-983712	Ion channel transport	1	236	0.0185418	0.874752	0.874752	4	43	0.00430215	9606	Homo sapiens	CLCA2		R-HSA-2744361;R-HSA-5333671;R-HSA-2744242;R-HSA-2684901
R-HSA-2172127	DAP12 interactions	2	409	0.0321339	0.875195	0.875195	6	122	0.0122061	9606	Homo sapiens	FGF19;FGG		R-HSA-2316434;R-HSA-5672980;R-HSA-5672965;R-HSA-5672978;R-HSA-5672972;R-HSA-5672973
R-HSA-5653656	Vesicle-mediated transport	5	859	0.067489	0.876091	0.876091	8	236	0.0236118	9606	Homo sapiens	GJB6;GJB5;HP		R-HSA-2168883;R-HSA-2168885;R-HSA-451056;R-HSA-190682;R-HSA-2230938;R-HSA-2168889;R-HSA-190698;R-HSA-190687
R-HSA-416476	G alpha (q) signalling events	1	240	0.0188561	0.879126	0.879126	3	20	0.002001	9606	Homo sapiens	EDN2		R-HSA-749448;R-HSA-749452;R-HSA-379048
R-HSA-5619115	Disorders of transmembrane transporters	1	245	0.0192489	0.884382	0.884382	1	87	0.00870435	9606	Homo sapiens	SLC34A2		R-HSA-5651697
R-HSA-187037	NGF signalling via TRKA from the plasma membrane	2	426	0.0334695	0.88931	0.88931	6	143	0.0143072	9606	Homo sapiens	FGF19;FGG		R-HSA-2316434;R-HSA-5672980;R-HSA-5672965;R-HSA-5672978;R-HSA-5672972;R-HSA-5672973
R-HSA-156580	Phase II conjugation	1	262	0.0205845	0.900612	0.900612	1	68	0.0068034	9606	Homo sapiens	UGT2B15		R-HSA-174931
R-HSA-2871796	FCERI mediated MAPK activation	2	445	0.0349623	0.903341	0.903341	5	59	0.00590295	9606	Homo sapiens	FGF19;FGG		R-HSA-5672980;R-HSA-5672965;R-HSA-5672978;R-HSA-5672972;R-HSA-5672973
R-HSA-199991	Membrane Trafficking	3	631	0.0495757	0.917192	0.917192	4	204	0.0204102	9606	Homo sapiens	GJB6;GJB5		R-HSA-451056;R-HSA-190682;R-HSA-190698;R-HSA-190687
R-HSA-3700989	Transcriptional Regulation by TP53	2	484	0.0380264	0.927135	0.927135	18	256	0.0256128	9606	Homo sapiens	CDKN2A;TP63		R-HSA-3700984;R-HSA-6799815;R-HSA-6804998;R-HSA-6799462;R-HSA-6804996;R-HSA-6800836;R-HSA-6798082;R-HSA-6799777;R-HSA-6798081;R-HSA-6800001;R-HSA-139913;R-HSA-3700981;R-HSA-4331340;R-HSA-6799761;R-HSA-6799441;R-HSA-6800816;R-HSA-5632386;R-HSA-5632393
R-HSA-196854	Metabolism of vitamins and cofactors	1	301	0.0236486	0.929809	0.929809	2	163	0.0163082	9606	Homo sapiens	LRAT		R-HSA-975608;R-HSA-2404137
R-HSA-76002	Platelet activation, signaling and aggregation	1	305	0.0239629	0.932273	0.932273	16	114	0.0114057	9606	Homo sapiens	FGG		R-HSA-354149;R-HSA-429415;R-HSA-354087;R-HSA-372705;R-HSA-429441;R-HSA-481007;R-HSA-354124;R-HSA-377644;R-HSA-377641;R-HSA-377640;R-HSA-377643;R-HSA-372693;R-HSA-354165;R-HSA-354066;R-HSA-372697;R-HSA-354073
R-HSA-2730905	Role of LAT2/NTAL/LAB on calcium mobilization	1	314	0.02467	0.937508	0.937508	1	40	0.004002	9606	Homo sapiens	FGF19		R-HSA-2316434
R-HSA-166520	Signalling by NGF	2	520	0.0408548	0.944131	0.944131	6	197	0.0197099	9606	Homo sapiens	FGF19;FGG		R-HSA-2316434;R-HSA-5672980;R-HSA-5672965;R-HSA-5672978;R-HSA-5672972;R-HSA-5672973
R-HSA-211859	Biological oxidations	2	523	0.0410905	0.945365	0.945365	2	175	0.0175088	9606	Homo sapiens	CPS1;UGT2B15		R-HSA-5433074;R-HSA-174931
R-HSA-597592	Post-translational protein modification	5	1028	0.0807668	0.950738	0.950738	4	368	0.0368184	9606	Homo sapiens	CDKN2A;HIST2H2BE		R-HSA-5690080;R-HSA-5696960;R-HSA-2997706;R-HSA-4568846
R-HSA-2454202	Fc epsilon receptor (FCERI) signaling	2	564	0.0443118	0.959845	0.959845	6	135	0.0135068	9606	Homo sapiens	FGF19;FGG		R-HSA-2316434;R-HSA-5672980;R-HSA-5672965;R-HSA-5672978;R-HSA-5672972;R-HSA-5672973
R-HSA-162582	Signal Transduction	18	2884	0.226587	0.962885	0.962885	88	1836	0.183692	9606	Homo sapiens	CXCL6;FGFBP1;WNT10A;EDN2;FGF19;FGG;COL4A5;PKP1;LRAT;MMP10;HIST2H2BE		R-HSA-109699;R-HSA-749448;R-HSA-749454;R-HSA-749452;R-HSA-429441;R-HSA-3364026;R-HSA-3781941;R-HSA-2404137;R-HSA-3781943;R-HSA-5625797;R-HSA-5625796;R-HSA-3238691;R-HSA-3238694;R-HSA-354066;R-HSA-5654734;R-HSA-373791;R-HSA-749456;R-HSA-354073;R-HSA-1307955;R-HSA-354087;R-HSA-1307963;R-HSA-203946;R-HSA-5654655;R-HSA-377644;R-HSA-5654653;R-HSA-380073;R-HSA-5625849;R-HSA-377641;R-HSA-5625848;R-HSA-5…
R-HSA-168249	Innate Immune System	8	1534	0.120522	0.964682	0.964682	15	686	0.0686343	9606	Homo sapiens	APCS;FGF19;FGG;HP;PKP1;KRT5;CTSL2;LTF		R-HSA-5672980;R-HSA-5672978;R-HSA-1222491;R-HSA-6800426;R-HSA-2316434;R-HSA-8870678;R-HSA-5672965;R-HSA-6810643;R-HSA-6800434;R-HSA-173626;R-HSA-6798749;R-HSA-5672972;R-HSA-5672973;R-HSA-1678981;R-HSA-6798745
R-HSA-1280215	Cytokine Signaling in Immune system	3	762	0.059868	0.965313	0.965313	9	350	0.0350175	9606	Homo sapiens	FGF19;FGG;CRLF1		R-HSA-6783670;R-HSA-5672980;R-HSA-6783556;R-HSA-5672965;R-HSA-5672978;R-HSA-5672972;R-HSA-5672973;R-HSA-5696490;R-HSA-6783530
R-HSA-392499	Metabolism of proteins	9	1697	0.133328	0.967992	0.967992	11	648	0.0648324	9606	Homo sapiens	SLC34A2;APCS;CALB1;CDKN2A;HIST2H2BE;LTF		R-HSA-976734;R-HSA-5690080;R-HSA-5696960;R-HSA-977224;R-HSA-2997706;R-HSA-4568846;R-HSA-976723;R-HSA-427656;R-HSA-977136;R-HSA-976817;R-HSA-8932599
R-HSA-983705	Signaling by the B Cell Receptor (BCR)	1	390	0.0306411	0.968392	0.968392	1	66	0.0066033	9606	Homo sapiens	FGF19		R-HSA-2316434
R-HSA-112316	Neuronal System	1	410	0.0322124	0.973601	0.973601	1	151	0.0151076	9606	Homo sapiens	SYT12		R-HSA-6794348
R-HSA-71291	Metabolism of amino acids and derivatives	2	629	0.0494186	0.975597	0.975597	2	246	0.0246123	9606	Homo sapiens	CPS1;PKP1		R-HSA-70555;R-HSA-5693148
R-HSA-372790	Signaling by GPCR	7	1478	0.116122	0.978628	0.978628	17	319	0.031916	9606	Homo sapiens	CXCL6;WNT10A;EDN2;FGF19;FGG;MMP10		R-HSA-5672980;R-HSA-749448;R-HSA-5672978;R-HSA-749454;R-HSA-749452;R-HSA-2179402;R-HSA-380073;R-HSA-379048;R-HSA-201708;R-HSA-373813;R-HSA-5672965;R-HSA-2179413;R-HSA-388560;R-HSA-373791;R-HSA-5672972;R-HSA-749456;R-HSA-5672973
R-HSA-425407	SLC-mediated transmembrane transport	1	454	0.0356694	0.982255	0.982255	1	193	0.0193097	9606	Homo sapiens	SLC34A2		R-HSA-427656
R-HSA-983169	Class I MHC mediated antigen processing & presentation	1	478	0.037555	0.98572	0.98572	1	44	0.0044022	9606	Homo sapiens	CTSL2		R-HSA-1236948
R-HSA-382551	Transmembrane transport of small molecules	3	888	0.0697674	0.98575	0.98575	10	320	0.032016	9606	Homo sapiens	SLC34A2;CLCA2;AQP3		R-HSA-2744361;R-HSA-445714;R-HSA-5333671;R-HSA-507871;R-HSA-507870;R-HSA-507869;R-HSA-507868;R-HSA-2744242;R-HSA-2684901;R-HSA-427656
R-HSA-5663205	Infectious disease	1	508	0.039912	0.989123	0.989123	1	311	0.0311156	9606	Homo sapiens	LTF		R-HSA-1222641
R-HSA-109582	Hemostasis	1	654	0.0513828	0.997135	0.997135	20	312	0.0312156	9606	Homo sapiens	FGG		R-HSA-354149;R-HSA-429415;R-HSA-354087;R-HSA-372705;R-HSA-429441;R-HSA-481007;R-HSA-140842;R-HSA-354124;R-HSA-377644;R-HSA-140840;R-HSA-377641;R-HSA-377640;R-HSA-377643;R-HSA-372693;R-HSA-354165;R-HSA-140851;R-HSA-140599;R-HSA-354066;R-HSA-372697;R-HSA-354073
R-HSA-1643685	Disease	5	1472	0.115651	0.997184	0.997184	25	882	0.0882441	9606	Homo sapiens	SLC34A2;FGF19;FGG;LRAT;LTF		R-HSA-6802919;R-HSA-6802918;R-HSA-6802914;R-HSA-6803234;R-HSA-6803233;R-HSA-6802912;R-HSA-6802926;R-HSA-6802925;R-HSA-6802922;R-HSA-6802921;R-HSA-6802935;R-HSA-6802934;R-HSA-6802933;R-HSA-6802932;R-HSA-6802943;R-HSA-6802942;R-HSA-1222641;R-HSA-5651697;R-HSA-2400009;R-HSA-2466710;R-HSA-5687585;R-HSA-6802911;R-HSA-6802910;R-HSA-6803230;R-HSA-6803227
R-HSA-388396	GPCR downstream signaling	3	1124	0.0883092	0.997589	0.997589	6	64	0.0064032	9606	Homo sapiens	CXCL6;EDN2		R-HSA-749448;R-HSA-749454;R-HSA-749452;R-HSA-749456;R-HSA-380073;R-HSA-379048
R-HSA-1280218	Adaptive Immune System	3	1148	0.0901948	0.998002	0.998002	5	262	0.0262131	9606	Homo sapiens	FGF19;CTSL2		R-HSA-2316434;R-HSA-2130706;R-HSA-1236948;R-HSA-2130504;R-HSA-2130349
R-HSA-168256	Immune System	10	2461	0.193353	0.999118	0.999118	23	1208	0.12086	9606	Homo sapiens	APCS;FGF19;FGG;HP;PKP1;KRT5;CRLF1;CTSL2;LTF		R-HSA-5672980;R-HSA-6783556;R-HSA-5672978;R-HSA-1236948;R-HSA-2130504;R-HSA-1222491;R-HSA-6783530;R-HSA-6800426;R-HSA-2130349;R-HSA-6783670;R-HSA-2316434;R-HSA-8870678;R-HSA-2130706;R-HSA-5672965;R-HSA-6810643;R-HSA-6800434;R-HSA-173626;R-HSA-6798749;R-HSA-5672972;R-HSA-5672973;R-HSA-5696490;R-HSA-1678981;R-HSA-6798745
R-HSA-212436	Generic Transcription Pathway	2	1042	0.0818668	0.999169	0.999169	18	352	0.0352176	9606	Homo sapiens	CDKN2A;TP63		R-HSA-3700984;R-HSA-6799815;R-HSA-6804998;R-HSA-6799462;R-HSA-6804996;R-HSA-6800836;R-HSA-6798082;R-HSA-6799777;R-HSA-6798081;R-HSA-6800001;R-HSA-139913;R-HSA-3700981;R-HSA-4331340;R-HSA-6799761;R-HSA-6799441;R-HSA-6800816;R-HSA-5632386;R-HSA-5632393
R-HSA-74160	Gene Expression	5	2118	0.166405	0.999981	0.999981	41	781	0.0781391	9606	Homo sapiens	CDKN2A;HIST2H2BE;TP63		R-HSA-5334097;R-HSA-3700984;R-HSA-427527;R-HSA-5334160;R-HSA-6799462;R-HSA-5334099;R-HSA-5334164;R-HSA-6799777;R-HSA-139913;R-HSA-3700981;R-HSA-433672;R-HSA-427528;R-HSA-427336;R-HSA-4331340;R-HSA-427337;R-HSA-5334151;R-HSA-6800816;R-HSA-5632386;R-HSA-5334152;R-HSA-5632393;R-HSA-212252;R-HSA-6799815;R-HSA-6804998;R-HSA-5578742;R-HSA-6804996;R-HSA-6800836;R-HSA-212263;R-HSA-6798082;R-HSA-6798081;R…
R-HSA-556833	Metabolism of lipids and lipoproteins	1	1389	0.109129	0.999997	0.999997	1	888	0.0888444	9606	Homo sapiens	C7orf68		R-HSA-8858270
R-HSA-1430728	Metabolism	10	3452	0.271213	0.999999	0.999999	8	2106	0.210705	9606	Homo sapiens	CPS1;UGT2B15;PKP1;LRAT;C7orf68		R-HSA-5433074;R-HSA-174931;R-HSA-975608;R-HSA-8858270;R-HSA-203946;R-HSA-70555;R-HSA-5693148;R-HSA-2404137
