# Supplementary material for: Use of Angiotensin System Inhibitors Is Associated with Immune Activation and Longer Survival in Nonmetastatic Pancreatic Ductal Adenocarcinoma
Source: Oxford University Press journal article supplement (doi:10.1158/1078-0432.ccr-17-0256), 2017-06-09
Supplement: 10780432ccr170256-sup-178162_3_unknown_upload_4060984_tqh8tm.xlsx [file 10780432ccr170256-sup-178162_3_unknown_upload_4060984_tqh8tm.xlsx]

## Sheet: Sheet1
Supplementary Table 12A: Adjusted Analysis with Multivariate Model on TCGA PDAC dataset to test for independent factors.
		HR	95% CI	p value
Age	inc 1y	1.02	0.996 - 1.044	0.103
Size	inc 1cm	1.058	0.911 - 1.228	0.461
Site	Non-head	2.951	1.269 - 6.866	0.012
	Head
Margin	-	1.255	0.754 - 2.087	0.382
	+
LNR	0	1.449	1.054 - 1.992	0.022
	<= 0.2
	>0.2
Grade	1 & 2	1.678	1.174 - 2.399	0.005
	3 & 4
RT	-	0.534	0.285 - 0.998	0.049
	+
Chemo	-	0.313	0.179 - 0.547	<0.001
	+
ASI inhibited gene expression level	low	1.787	1.310 - 2.437	<0.001
	mid
	high
Supplementary Table 12B: Log-Rank analysis of ASI upregulated genes in TCGA cohorts
Pairwise Comparisons		Log Rank (Mantel-Cox)
	low		intermediate		high
	Chi-Square	Sig.	Chi-Square	Sig.	Chi-Square	Sig.
low			1.364	0.243	3.066	0.08
intermediate	1.364	0.243			0.25	0.617
high	3.066	0.08	0.25	0.617
Supplementary Table 12C: Log-Rank analysis of ASI upregulated genes in UNC cohorts
Pairwise Comparisons		Log Rank (Mantel-Cox)
	low		intermediate		high
	Chi-Square	Sig.	Chi-Square	Sig.	Chi-Square	Sig.
low			0.022	0.883	0.01	0.922
intermediate	0.022	0.883			0.044	0.834
high	0.01	0.922	0.044	0.834
